# Supplementary material for: Polyunsaturated fatty acid production by Yarrowia lipolytica employing designed myxobacterial PUFA synthases
Source: PubMed Central journal article supplement (PMC6731297; doi:10.1038/s41467-019-12025-8), 2019-09-06
Supplement: 41467_2019_12025_MOESM1_ESM.pdf [file 41467_2019_12025_MOESM1_ESM.pdf]

## **Supplementary Information**

**Polyunsaturated fatty acid production by *Yarrowia lipolytica* employing  
designed myxobacterial PUFA synthases**

**Gemperlein et al.**

## Supplementary Notes

Besides the first codon optimization strategy, which was applied for the design of the gene sequences in gene cluster C1\_V1, we aimed at testing the effect of an alternative gene optimization approach on recombinant LC-PUFA production in *Y. lipolytica*. Thereby, the transfer of the course of the codon usage along the message from the prokaryotic donor to the eukaryotic acceptor was regarded as the simplest formalism of codon adaptation with a high plausibility. Hence, the sequence of the *pfa* gene cluster version C1\_V2 (**Fig. 2a**), encoding the DPA/DHA-type PUFA synthase from *A. fasciculatus*, was designed towards a formally improved translational elongation via a “codon harmonization” resembling strategy, where the course of the local codon adaptation index along the native mRNA of the source species was imitated in the target host species (e.g., a less well-adapted and thus assumed to be rather slowly translated region in the native sequence was replaced by a rarer one in the target and *vice versa*). Especially, rare codons should be conserved, as it has been shown that they have an important role for the production of functional proteins, potentially in the regulation of the rate of protein synthesis and of the earliest steps of protein folding<sup>1</sup> (all details to the sequence design can be found in **Supplementary Figs. 9-11, 13-19 and Supplementary Tables 4-8, 14-19**). Four building blocks containing the three *pfa* coding sequences as well as the *ppt* coding sequence flanked by hp4d promoters and *LIP2* terminators, plus intergenic linker sequences were synthesized, assembled, and finally cloned into plasmid pKG2-PIS. The yeast cassette of the resulting plasmid pAf7 was transferred into *Y. lipolytica* Po1h and selected clones were screened for correct integration of the transgenes into the preferred integration site (YALI0\_C05907g). *Y. lipolytica* Po1h::Af7 was cultivated in triplicates as described above, followed by isolation and analysis of the FAMES. Production of DHA at a concentration of 10.6 % of TFAs, 88.7 mg L<sup>-1</sup>, and 12.2 mg g<sup>-1</sup> CDW and some minor amounts of *n*-6 DPA and *n*-3 DPA were achieved (**Fig. 2c and Supplementary Table 9**). Interestingly, *Y. lipolytica* Po1h::Af7 produces DHA, *n*-6 DPA, and *n*-3 DPA in comparable

amounts as *Y. lipolytica* Po1h::Af4, containing gene cluster C1\_V1. The same LC-PUFA yields obtained with two artificial *pfa* gene clusters differing in their codon usage modulation indicate possible bottlenecks within the LC-PUFA production pipeline in the cells, which need finally to be identified and eliminated in order to further improve the production yield. We first aimed at comparing the amount of Pfa proteins in the cells of strain *Y. lipolytica* Po1h::Af4 and of strain *Y. lipolytica* Po1h::Af7. A straightforward experiment for detection of Pfa proteins within the cells represents the fluorescence measurement upon the fusion of the fluorescent protein mCherry at the C-terminus of the Pfa proteins. In this experiment, all produced Pfa proteins that are not truncated caused by aborted translation should account for the fluorescence signal. Only proteins Pfa2 and Pfa3 were tagged with mCherry, since translational elongation is especially critical in case of the long mRNAs of the multifunctional PUFA synthase genes *pfa2* and *pfa3*. Four expression constructs were cloned by fusion of the open reading frame of gene *mcherry* with the last sense codon at the 3' end of either gene *pfa2* or gene *pfa3* of the two different synthetic *pfa* gene clusters in a PCR-based approach. *Y. lipolytica* Po1h was transformed with the yeast cassette of any of the final expression constructs pAf4-*pfa2-mcherry*, pAf4-*pfa3-mcherry*, pAf7-*pfa2-mcherry*, and pAf7-*pfa3-mcherry*. Two clones of *Y. lipolytica* Po1h::Af4-*pfa2-mcherry*, *Y. lipolytica* Po1h::Af4-*pfa3-mcherry*, *Y. lipolytica* Po1h::Af7-*pfa2-mcherry*, as well as *Y. lipolytica* Po1h::Af7-*pfa3-mcherry*, each possessing the transgenes integrated into the preferred integration site (YALI0\_C05907g), were cultivated in triplicates as described above. The mCherry fluorescence signal from the liquid cultures was analyzed by fluorescence spectroscopy. Remarkably, the fluorescence signals obtained from the clones of *Y. lipolytica* Po1h::Af4-*pfa2-mcherry* were largely identical to those obtained from the clones of *Y. lipolytica* Po1h::Af7-*pfa2-mcherry*, indicating the production of comparable amounts of full-length protein Pfa2 by the two different strains. The same observation was made for the fluorescence signals received from the clones of *Y. lipolytica* Po1h::Af4-*pfa3-mcherry* and *Y. lipolytica*

Po1h::Af7-*pfa3-mcherry* (**Supplementary Fig. 19**). Possible explanations for these findings might be that translation and/or co-translational folding processes are robust and largely independent of the two codon optimization strategies or that “key codons” with special relevance for translation and/or co-translational folding exist, which are identical in the two synthetic *pfa* gene cluster versions (87.9 % of the codons in *pfa2\_V1* and *pfa2\_V2* and 86.3 % of the codons in *pfa3\_V1* and *pfa3\_V2* are identical). It is also conceivable that one of the two versions has the potential for production of higher amounts of functional proteins Pfa2 and Pfa3 but the limit is already reached with each version due to bottlenecks in biosynthesis or posttranslational modifications of Pfa2/Pfa3 or due to their degradation.

### Supplementary Methods

The four building blocks of synthetic gene cluster version C1\_V2 were stitched together in plasmid pACYC\_BB1-4\_C1\_V1: Building block 1 was inserted into pACYC\_BB1-4\_C1\_V1 via *SdaI* and *ApaLI* restriction sites, generating plasmid pACYC\_BB2-4\_C1\_BB1\_V2; building block 4 was inserted into pACYC\_BB2-4\_C1\_BB1\_V2 via *AvrII* and *PacI* restriction sites, generating plasmid pACYC\_BB2+3\_C1\_BB1+4\_V2; building block 2 was inserted into pACYC\_BB2+3\_C1\_BB1+4\_V2 via *ApaLI* and *AcII* restriction sites, generating plasmid pACYC\_BB3\_C1\_BB1+2+4\_V2; building block 3 was inserted into pACYC\_BB3\_C1\_BB1+2+4\_V2 via *AcII* and *AvrII* restriction sites, generating plasmid pACYC\_BB1-4\_C1\_V2. The backbone of plasmid pACYC\_BB1-4\_C1\_V2 was exchanged for the backbone of plasmid pKG2-PIS via *SdaI* and *PacI* restriction sites, yielding plasmid pAf7.

In order to monitor the expression of the artificial PUFA biosynthetic pathways version C1\_V1 and C1\_V2 in *Y. lipolytica*, the open reading frame of gene *mcherry* was fused with

the last sense codon at the 3' end of either gene *pfa2* or gene *pfa3* by overlap extension PCR: In case of the 3'*pfa2-mcherry* fusion, 1.1 kb of the 3' end of *pfa2* plus the 5' end of *mcherry* as overlapping sequence were amplified as the first fragment from plasmid pAf4 using primers *pfa2\_fwd* and *pfa2+mcherry overlap\_rev* in case of C1\_V1 or from plasmid pAf7 using primers *pfa2\_fwd* and *pfa2+mcherry overlap\_rev\_2* in case of C1\_V2. The second fragment (0.8 kb) contained the open reading frame of a synthetic *mcherry* gene plus the 3' end of *pfa2* and the 5' part of the *LIP2* terminator as overlapping sequences and was amplified from a standard cloning vector supplied by a gene synthesis company using primers *mcherry+pfa2 overlap\_fwd* and *mcherry+LIP2t overlap\_rev* in case of C1\_V1 or using primers *mcherry+pfa2 overlap\_fwd\_2* and *mcherry+LIP2t overlap\_rev* in case of C1\_V2. The *LIP2* terminator plus the 3' end of *mcherry* as overlapping sequence and parts of linker sequence 2 were amplified as the third fragment (0.2 kb) from plasmid pAf4 using primers *LIP2t+mcherry overlap\_fwd* and *linker 2\_rev*. PCR amplification of the three fragments to be spliced was performed with Phusion DNA polymerase (Thermo Scientific) under standard conditions according to the manufacturer's protocol. The reactions contained 5 % DMSO and were carried out in an Eppendorf Mastercycler under the following conditions: initial denaturation for 2 min at 98 °C; 20 cycles consisting of denaturation for 15 s at 98 °C, annealing for 20 s at 67 °C, and extension for 10 s/kb at 72 °C; and a final extension for 10 min at 72 °C. For the subsequent overlap extension PCR using primers *pfa2\_fwd* and *linker 2\_rev*, the three amplified fragments were used as templates in each case. PCR of the 1.9 kb fragments 3'*pfa2-mcherry-LIP2t-linker 2* was performed as described for the amplification of the three fragments to be spliced. In order to generate plasmids pACYC\_BB1-4\_C1\_V1\_*pfa2-mcherry* and pACYC\_BB1-4\_C1\_V2\_*pfa2-mcherry*, the 3' end of synthetic gene *pfa2* originating from *A. fasciculatus* (SBSr002) located on plasmid pACYC\_BB1-4\_C1\_V1 or plasmid pACYC\_BB1-4\_C1\_V2 was replaced by the respective PCR amplicon via *KfII* and *AcII* restriction sites. The backbones of plasmids pACYC\_BB1-4\_C1\_V1\_*pfa2-*

*mcherry* and pACYC\_BB1-4\_C1\_V2\_*pfa2-mcherry* were exchanged for the backbone of plasmid pKG2-PIS via *SdaI* and *PacI* restriction sites, yielding plasmids pAf4-*pfa2-mcherry* and pAf7-*pfa2-mcherry*. In case of the 3'*pfa3-mcherry* fusion, 1.1 kb of the 3' end of *pfa3* plus the 5' end of *mcherry* as overlapping sequence were amplified as the first fragment from plasmid pAf4 using primers *pfa3\_fwd* and *pfa3+mcherry overlap\_rev* in case of C1\_V1 or from plasmid pAf7 using primers *pfa3\_fwd* and *pfa3+mcherry overlap\_rev\_2* in case of C1\_V2. The second fragment (0.8 kb) contained the open reading frame of a synthetic *mcherry* gene plus the 3' end of *pfa3* and the 5' part of the *LIP2* terminator as overlapping sequences and was amplified from a standard cloning vector supplied by a gene synthesis company using primers *mcherry+pfa3 overlap\_fwd* and *mcherry+LIP2t overlap\_rev* in case of C1\_V1 or using primers *mcherry+pfa3 overlap\_fwd\_2* and *mcherry+LIP2t overlap\_rev* in case of C1\_V2. The *LIP2* terminator plus the 3' end of *mcherry* as overlapping sequence and parts of linker sequence 3 were amplified as the third fragment (0.2 kb) from plasmid pAf4 using primers *LIP2t+mcherry overlap\_fwd* and *linker 3\_rev*. PCR amplification of the three fragments to be spliced was performed with Phusion DNA polymerase (Thermo Scientific) under standard conditions according to the manufacturer's protocol. The reactions contained 5 % DMSO and were carried out in an Eppendorf Mastercycler under the following conditions: initial denaturation for 2 min at 98 °C; 20 cycles consisting of denaturation for 15 s at 98 °C, annealing for 20 s at 67 °C, and extension for 10 s/kb at 72 °C; and a final extension for 10 min at 72 °C. For the subsequent overlap extension PCR using primers *pfa3\_fwd* and *linker 3\_rev*, the three amplified fragments were used as templates in each case. PCR of the 2.0 kb fragments 3'*pfa3-mcherry-LIP2t-linker 3* was performed as described for the amplification of the three fragments to be spliced. In order to generate plasmid pACYC\_BB1-4\_C1\_V1\_*pfa3-mcherry*, the 3' end of synthetic gene *pfa3* originating from *A. fasciculatus* (SBSr002) located on plasmid pACYC\_BB1-4\_C1\_V1 was replaced by the respective PCR amplicon via *PdiI* and *AvrII* restriction sites. The backbone of plasmid pACYC\_BB1-4\_C1\_V1\_*pfa3-mcherry*

was exchanged for the backbone of plasmid pKG2-PIS via *SdaI* and *PacI* restriction sites, yielding plasmid pAf4-*pfa3-mcherry*. Plasmid pAf7-*pfa3-mcherry* was generated by replacing the 3' end of synthetic gene *pfa3* originating from *A. fasciculatus* (SBSr002) located on plasmid pAf7 with the respective PCR amplicon via *FseI* and *AvrII* restriction sites. Sequences of primers used in this study are listed in **Supplementary Table 11** and further information on the plasmids constructed in this study are provided in **Supplementary Table 12**.

The fluorescence of mCherry produced by yeast cells grown in liquid YNBG medium was determined using an Infinite F200 PRO fluorescence microplate reader (Tecan). Ahead of the measurements, 20  $\mu\text{L}$  of the cultures were mixed with 180  $\mu\text{L}$  water in a 96-well microtiter plate. For fluorescence measurements (top reading), an excitation wavelength of  $550\pm 10$  nm and an emission wavelength of  $580\pm 20$  nm were used. The absorbance was measured at a wavelength of 600 nm. Blank values were generated by using water. For data analysis, the obtained absorbance signals were normalized by subtracting the mean of the blank values, and the obtained fluorescence signals were normalized by subtracting the mean of the blank values followed by dividing by the normalized absorbance values.

### **Supplementary Discussion**

The coding sequences of the artificial *pfa* gene clusters C1\_V1 and C3 were designed by aiming at improved translational elongation via silent mutations, whereby the coding sequences were adapted to the synonymous codon frequencies of *Yarrowia lipolytica* CLIB122, excluding a part of the minor codons. Such a balanced codon use is supposed to be more effective than using only the preferred codons<sup>2</sup>. All codons below a synonymous codon fraction of 20 % in the 6448 protein coding sequences of *Y. lipolytica* were not used in the

artificial *pfa* gene clusters C1\_V1 and C3 (**Supplementary Table 1**). As *Y. lipolytica* shows a higher preference for AT-rich codons as myxobacteria, the mean GC content of the coding sequences was lowered from 74 % (native *pfa* gene cluster of *Aethrobacter fasciculatus* (SBSr002)) and 71 % (native *pfa* gene cluster of *Minicystis rosea* (SBNa008)) to 62 % (artificial *pfa* gene cluster C1\_V1) and 61 % (artificial *pfa* gene cluster C3), respectively. The results of the codon adaptation are shown in **Supplementary Figs. 1 and 2**. The translation rate of a certain codon depends predominantly on the concentration of its aminoacyl-tRNA isoacceptors, and it has been shown that codon frequencies are positively correlated with tRNA concentrations<sup>3</sup>. The relative adaptiveness scoring system implemented in the Codon Adaptation Index (CAI)<sup>4</sup> - where the individual codon frequencies are scaled by the highest frequency within the corresponding synonymous codon group - was intended to build in a slight gradient of ribosomal kinetics between start and stop codon of each coding DNA sequence. This aims at the enhancement of the ribosomal occupancy along the mRNA to shield the transcript from the degradosome, provided that the translation initiation rate is sufficiently high<sup>5,6</sup> (**Supplementary Figs. 7 and 8**). The design of the artificial *pfa* gene cluster C3\_mod 5' included the optimization of the translation initiation site (TIS), concerning accessibility of the capping region<sup>7</sup>, the Kozak sequence including the start codon<sup>8</sup>, and the 5' region of the CDS<sup>9</sup>, expressed as opening energies calculated with algorithms from the ViennaRNA Package<sup>10</sup>. The TISs from artificial *pfa* gene clusters C3 and C3\_mod 5' are visualized in **Supplementary Figs. 4 and 5**, respectively. Numeric values for the selected control positions within the two artificial clusters are tabulated in **Supplementary Table 2**. Relative differences between the values for the two clusters, concerning the selected parameters, are given in **Supplementary Table 3**, and the results hint at an improvement of the TIS of cluster C3\_mod 5' compared to cluster C3.

The coding sequences of the artificial *pfa* gene cluster C1\_V2 were designed towards an adapted translation elongation velocity profile. In this approach, the given course and shape of



the estimated elongation speed along the mRNA is modulated, thereby recording the kinetic profile of the genes in the source organism to mimic it in the target host. The reason behind this approach is the assumption that a specific modulation of the elongation velocity is needed to prevent misfolding of the nascent polypeptide<sup>11</sup>. However, rather than pausing or decrease in speed, a higher velocity might enable correct protein folding<sup>12</sup>. There are two basic concepts: The first is “codon harmonization”, where the transfer happens codon by codon according to the frequency ranking within a synonymous codon group in each of the organisms considered<sup>13,14</sup>. The second consists of "sliding window" approaches using different window sizes (e.g., 17, 18, 21, 25 or 30 codons wide<sup>15-19</sup>) and differently processed codon features, such as for example tRNA concentrations<sup>15</sup>, tRNA gene copy numbers<sup>17,19</sup>, or differently obtained codon frequencies<sup>16,18</sup>. Some of the latter techniques were used for analysis purposes only. For the transfer of the translation elongation profile, the local CAI with a window span of 19 codons was used, contrary to the 25 codon windows used for C1\_V1<sup>18</sup>. It has been shown that the CAI is a very competitive predictor of translation efficiency in *Saccharomyces cerevisiae*<sup>20</sup>, presumed that a subset of putatively highly expressed genes is used for calculation. Besides this, own unpublished analyses with high quality ribosome profiling data<sup>21,22</sup> for *S. cerevisiae* provided convincing results in this respect. Utilizing the full genomic codon table<sup>23</sup> to determine the codon scores for CAI calculation like it was done for the design of version C1\_V1 (**Supplementary Table 1**) resembles more the approach applied in the framework of the %MinMax<sup>16</sup>. Presumed that the codon bias is unidirectional the correlation with translation speed should remain similar for both approaches because of the linkage with tRNA levels in both cases. To calculate the codon scores for the design of the artificial cluster C1\_V2, initially a set of 92 putative highly expressed genes, predominantly coding for ribosomal proteins with lengths over 200 bp (**Supplementary Table 19**), was chosen from the 6448 protein coding sequences of the *Y. lipolytica* CLIB122 genome (GenBank RefSeq chromosome A-F). After generating the codon

table, whereby the first 60 bp of the CDS and the last 30 bp of the CDS were omitted, the relative adaptiveness scores were calculated according to the original CAI definition (column 'w' in **Supplementary Table 15**). In the case of *A. fasciculatus* (SBSr002), the available 9638 CDS were translated according to the standard code and supplied to the KEGG BlastKOALA server (<https://www.kegg.jp/blastkoala/>) to obtain a collection of ribosomal proteins and elongation factors which are commonly assumed to be highly expressed. A set of 64 sequences was recognized, leading to a final collection of 57 reference genes by applying the 200 bp length filtering step (**Supplementary Table 18**). The same procedure as for *Y. lipolytica* was used to generate the codon scores (column 'w' in **Supplementary Table 16**). For the adaptation of the synonymous codon usage fractions of the genes *pfa1*, *pfa2*, *pfa3*, and *ppt* of the artificial *pfa* gene cluster C1\_V2, a target codon table was generated by cutting out a sub-cluster of the whole protein coding sequences by a maximum likelihood clustering approach. After subsequently performing the length filtering, a homogenous set of 1,609 coding sequences of *Y. lipolytica* in terms of codon usage was obtained in this way. Comparison with RNA-Seq data from the related strain *Y. lipolytica* CLIB89 showed that this fraction of the genomic CDS represents nearly 60 % of the protein coding transcriptome obtained by weighting the CDSs from the whole CLIB122 genome by the expression levels of the corresponding CLIB89 transcripts. Furthermore, the distribution of the synonymous codon fractions of this sequence set has more similarity to the calculated transcriptomics codon usage than either the genomic codon usage or the codon usage of the putative highly expressed genes from the (ribosomal) reference set. In fact, there is a gradually increasing bias towards the preferred codons from the genomic codon usage (**Supplementary Table 1**), to the automatically sub-clustered sequences (**Supplementary Table 14**), and finally to the codon usage of the reference set used for the formal CAI calculation (**Supplementary Table 15**). For comparison purposes the coding sequences of *A. fasciculatus* (SBSr002) were clustered in the same way. Results from a formal quantification of codon bias<sup>24</sup> regarding the

two organisms is shown in **Supplementary Table 17**. The clustering was performed by simply maximizing the raw value of the G-test statistic (column 'G' in **Supplementary Table 17**) by a variant of a stochastic hill-climbing heuristic<sup>25</sup>. Thereby, the expected codon counts correspond to the whole genome and the formally observed ones to a subset thereof (in analyses e.g., a preselected high expression subset<sup>24</sup>). For clustering, the initially random composition of the subset is varied until the algorithm has converged. For the applied threshold used to remove the putative slowest codons from the preliminary codon table, a slightly different but related procedure compared to the procedure for C1\_V1 was applied. The 20 codons with the lowest relative adaptiveness values in the putative high expression set (column 'w' in **Supplementary Table 15**) were removed from the generated table. Afterwards, the table was normalized to yield the target codon fractions  $f_n$  used for optimization of cluster C1\_V2. Consequently, a relative adaptiveness threshold of 0.04 was applied, following standard conventions for the CAI definition by using a ribosomal subset of coding sequences for the codon score calculation. Results of the codon adaptation of cluster C1\_V2 to the target fractions  $f_n$  from **Supplementary Table 14** are shown in **Supplementary Fig. 13**. Results from the transfer of the local CAI profiles are shown in **Supplementary Figs. 15-18**. The blue line depicts the profile of the native local codon adaptation in *A. fasciculatus* (SBSr002), whereby the calculation is based on **Supplementary Table 16**. The red line depicts the transferred profile based on the codon usage of the reference set comprising the 92 putative highly expressed genes from *Y. lipolytica* CLIB122 shown in **Supplementary Table 15**. For comparison, also the profiles of the native *pfa* coding sequences from *A. fasciculatus* (SBSr002) in *Y. lipolytica* are shown in violet. The agreement of the blue and red lines in respect to the absolute CAI values is not intended but pure coincidence, because the simultaneous adaptation to the synonymous codon fractions  $f_n$  of the reduced codon set in **Supplementary Table 14** determines the absolute values on the CAI scale based on **Supplementary Table 15**. Using a larger subset of codons in the artificial codon table would

lead to smaller absolute local CAI values in the curve representing *Y. lipolytica* because lower-frequency codons, with consequently lower adaptiveness scores, would be used (note that the codon tables in **Supplementary Tables 1, 14, and 15** are similar in respect to their codon bias pattern). In the case of version C1\_V2, the mean GC content of the coding sequences was lowered from 74 % (native *pfa* gene cluster of *A. fasciculatus* (SBSr002)) to 63 %). Additionally, in contrast to the adaptation of the *pfa* genes from clusters C1\_V1 and C3, local secondary structures were suppressed to cancel out their influence on local translation efficiency<sup>26</sup> (for details see **Supplementary Fig. 6**). It is assumed that codon usage is the dominant factor, concerning the efficiency of translation elongation, at least in the absence of stable secondary structures with exceptionally low  $\Delta G$  values. In **Supplementary Table 5**, the corresponding values are tabulated for the native *pfa* cluster from *A. fasciculatus* (SBSr002), the artificial *pfa* cluster V1\_C1, and the artificial *pfa* cluster C1\_V2. For the latter, a lower  $\Delta G$  threshold of -15 kcal/mol, respecting the ensemble free energy calculated for a window of 41 nt, was applied.

For all the clusters C1\_V1, C1\_V2, and C3 specific sequences within the artificial genes which could be recognized as splicing signals by *Y. lipolytica*<sup>27</sup> were reduced to avoid splicing of the intronless pre-mRNAs. Another important factor to be considered is the metabolic cost of translational miselongation upon a frame shift. In order to terminate translation of incorrect reading frames early, the ribosome must encounter an off-frame stop codon. Furthermore, it has been shown that hidden stop codons in unused frames have a higher occurrence frequency than expected in natural sequences<sup>28</sup>. To keep mistranslation products as short as possible, the density of hidden stop codons was elevated. Additionally, polyadenylation signals were avoided as well as long sequence repeats<sup>29</sup> and homopolymeric stretches<sup>30</sup>.

Concerning the nearly equal PUFA yield obtained with the two versions C1\_V1 and C1\_V2 of the artificial biosynthetic *pfa* gene clusters, an additional plausibility evaluation was

performed, including the re-analysis of the translation elongation profile by means of a modified version of the original tRNA adaptation index (tAI)<sup>31</sup>. The utilized tAIaa<sup>20,32,33</sup> (or AAtAI) is formally equivalent to the CAI but uses weighted tRNA gene copy numbers (GCN) instead of codon counts. By means of analyzing the GCN of both organisms, the tRNA sparing strategy<sup>34</sup> was deduced and the possible anti-codon base modifications<sup>35</sup> considered. Through the assumption of simple but plausible wobble interactions<sup>36</sup> also the uncertainties in the case of the Deltaproteobacterium *A. fasciculatus* (SBSr002) were respected<sup>37</sup> (**Supplementary Fig. 9**). The gene copy numbers of the direct matching tRNA isoacceptors for each of the two organisms are given in column 'GCN' of **Supplementary Table 15** for *Y. lipolytica* CLIB122 and in **Supplementary Table 16** for *A. fasciculatus* (SBSr002). Gene copy numbers for *Y. lipolytica* were downloaded from GtRNAdb<sup>38</sup> (<http://gtrnadb.ucsc.edu/>). Those for *A. fasciculatus* (SBSr002) were obtained by analyzing the genome sequence with tRNAscan-SE<sup>39</sup> (<http://lowelab.ucsc.edu/tRNAscan-SE/>). In **Supplementary Fig. 9**, the CAI and tAIaa values for each protein coding sequence of *A. fasciculatus* (SBSr002) and *Y. lipolytica* are displayed. The calculated spearman correlation coefficients are 0.933 (p<0.001; permutation test with 10,000 randomizations) and 0.992 (p<0.001; permutation test with 10,000 randomizations), respectively. Hence, it seems plausible that the CAI is a reasonable approximation of tRNA adaptation and therefore translation efficiency<sup>20</sup>, which could be proven less speculative with ribosome profiling data, as in the case of *S. cerevisiae*<sup>21,22</sup>. Blue dots in the scatter plots depict the automatically clustered gene subsets for each organism, which correspond to the upper right quadrant. Using the local tAIaa with a window size of 19 codons, the approximate translation velocity profile of the *pfa2* and *pfa3* protein coding sequences from clusters C1\_V1 and C1\_V2 are again plotted in **Supplementary Figs. 10 and 11**, respectively. The slight gradient intended for version C1\_V1 is still present, visible in the linear fit. The profiles of the local tAIaa of *pfa2* and *pfa3* from cluster version C1\_V2 are similar to the local CAI in corresponding **Supplementary Figs. 15-18**. Following the same

method as for the versions C3 and C3\_mod 5', the local opening energies for various control positions within the TISs of the three *pfa* genes and gene *ppt* of the artificial *pfa* gene clusters C1\_V1 and C1\_V2 are displayed in **Supplementary Figs. 4 and 14**, respectively. The values are summarized in **Supplementary Table 4**. Codon adaptation indices and tAIaa values of the protein coding sequences of genes *pfa1*, *pfa2*, *pfa3*, and *ppt* from the artificial biosynthetic gene clusters C1\_V1 and C1\_V2 and for comparison also from the native *pfa* biosynthetic gene cluster are tabulated in **Supplementary Table 6**. An offset of 20 codons at the 5' region of the CDS and 10 codons at the 3' end was applied. A summary of the translation initiation sites and the global sequence features of the CDSs, including global parameters of the local  $\Delta G$  values of genes *pfa1*, *pfa2*, *pfa3*, and *ppt* from the artificial *pfa* biosynthetic gene clusters C1\_V1 and C1\_V2, is shown in **Supplementary Table 7**. The corresponding relative differences are tabulated in **Supplementary Table 8**. According to recent investigations, all structures with Gibbs free energy values above -18 kcal/mol within the UTR can provide decent initiation rates<sup>40</sup>. The global CAI and tAIaa values for version C1\_V1 and version C1\_V2 deviate from each other primarily due to the slightly different threshold definitions combined with the codon adaptation.

## Supplementary Figures

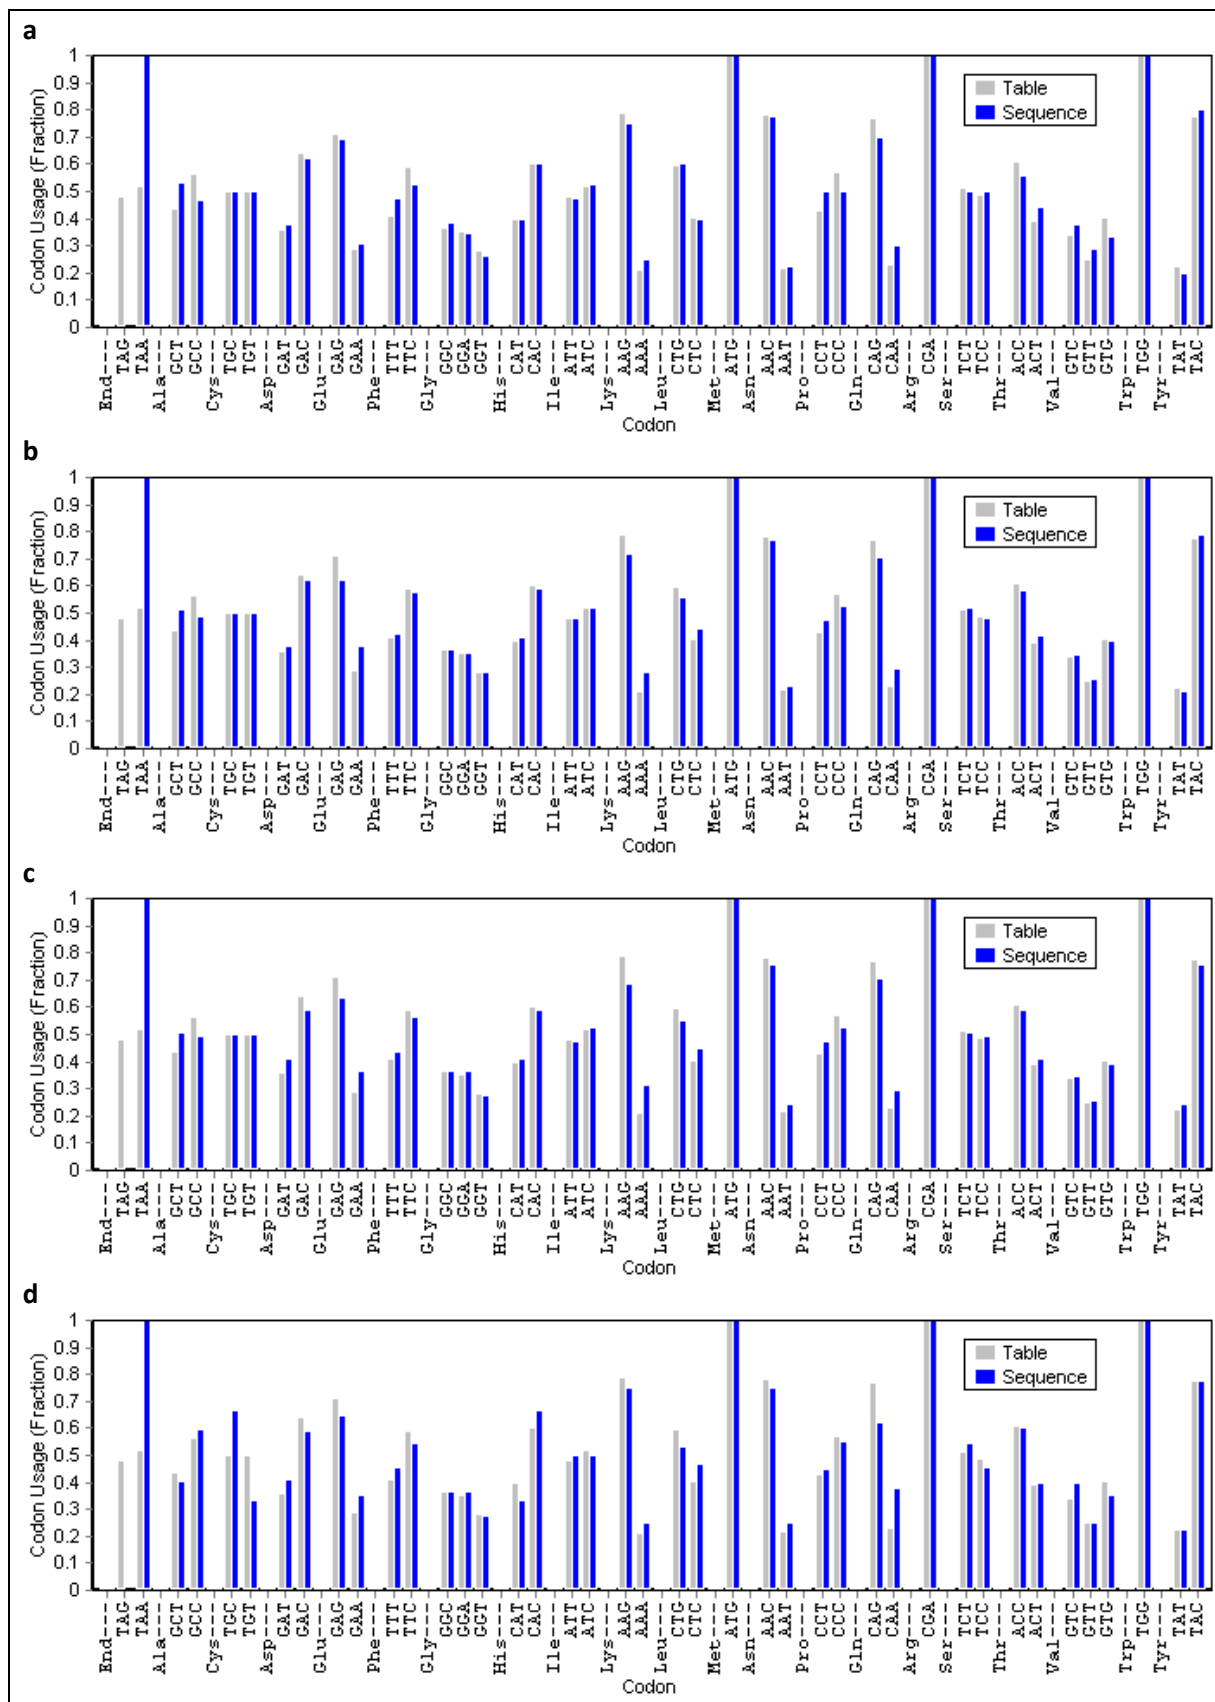

**Supplementary Figure 1: Adaptation of synonymous codon usage frequencies of the artificial *pfa* gene cluster C1\_V1.** Unused codons with frequencies below the applied frequency threshold of 0.2 are not shown in the graph. (a) *pfa1*. (b) *pfa2*. (c) *pfa3*. (d) *ppt*.

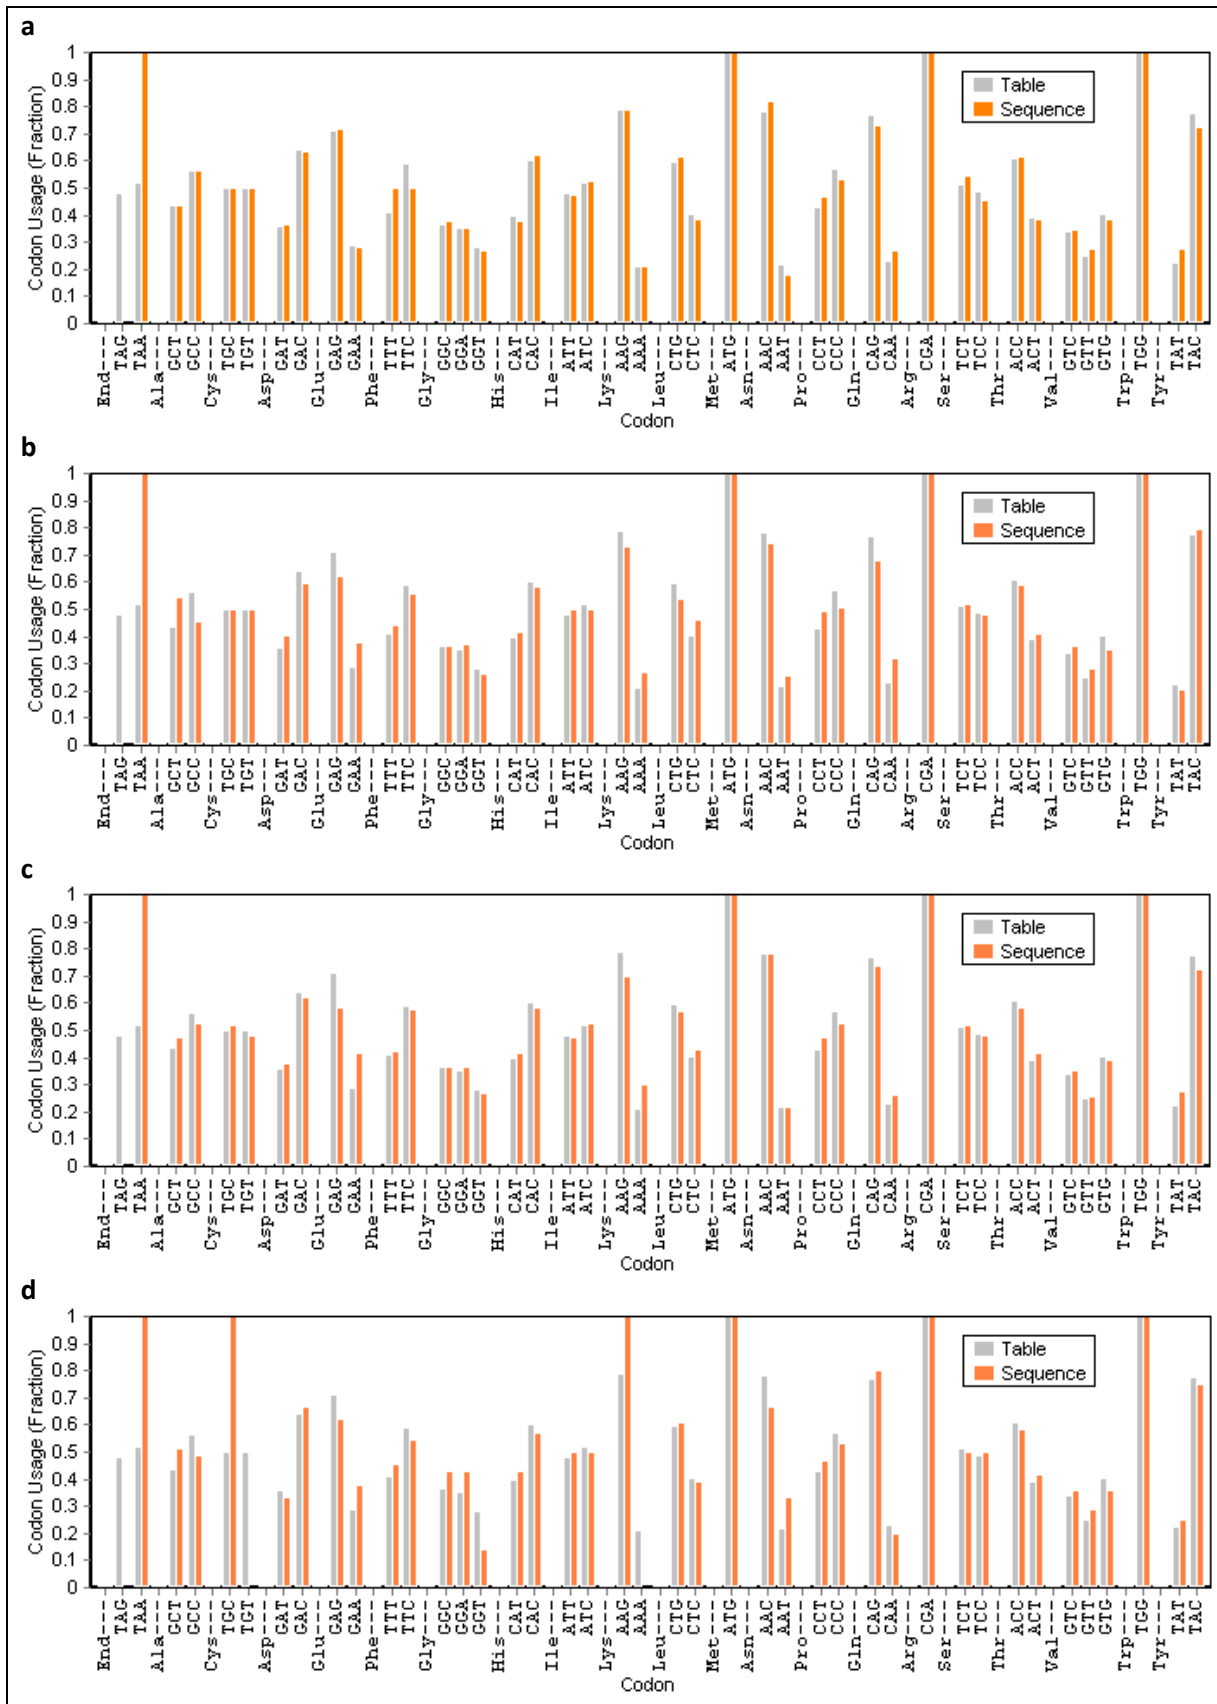

**Supplementary Figure 2: Adaptation of synonymous codon usage frequencies of the artificial *pfa* gene cluster C3.** Unused codons with frequencies below the applied frequency threshold of 0.2 are not shown in the graph. (a) *pfa1*. (b) *pfa2*. (c) *pfa3*. (d) *ppt*.



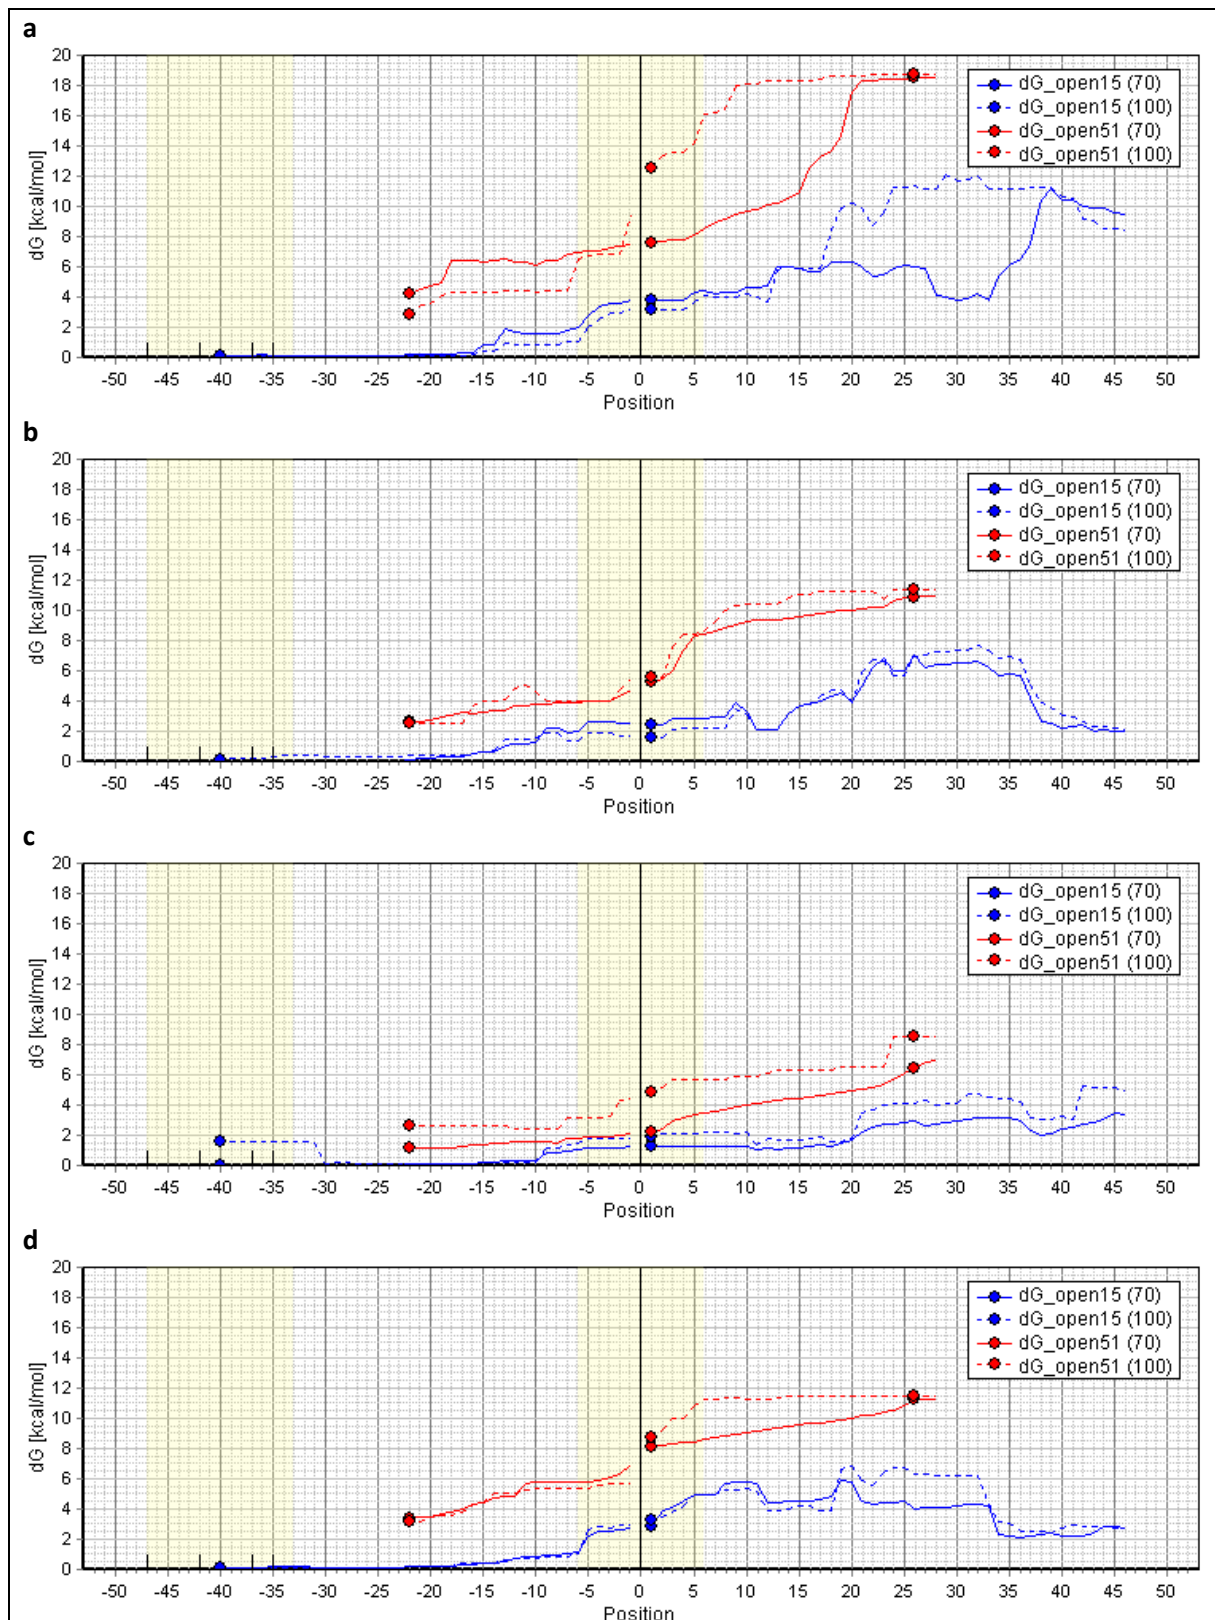

**Supplementary Figure 3: Opening energies for the translation initiation sites of cluster C1\_V1.** Opening energies to make a stretch of 15 nt and 51 nt accessible are drawn as blue and red lines, respectively. Solid and dashed lines correspond to a maximal allowed base pair span of 70 nt and 100 nt, respectively. Position denotes the center of the stretch. The yellow regions correspond to the first stretch at the cap from -47 to -33 (Cap<sub>15</sub>) and the Kozak sequence. Alternative TSSs are shown as vertical bars<sup>41</sup>. Control points are drawn at -40 (Cap<sub>15</sub>), the first 51 nt-stretch at -22 (UTR<sub>51</sub>), the ATG at +1 (ATG<sub>15</sub>, ATG<sub>51</sub>), and the center of the last 51 nt-stretch at +26 (CDS<sub>51</sub>). a) *pfa1*. b) *pfa2*. c) *pfa3*. d) *ppt*.

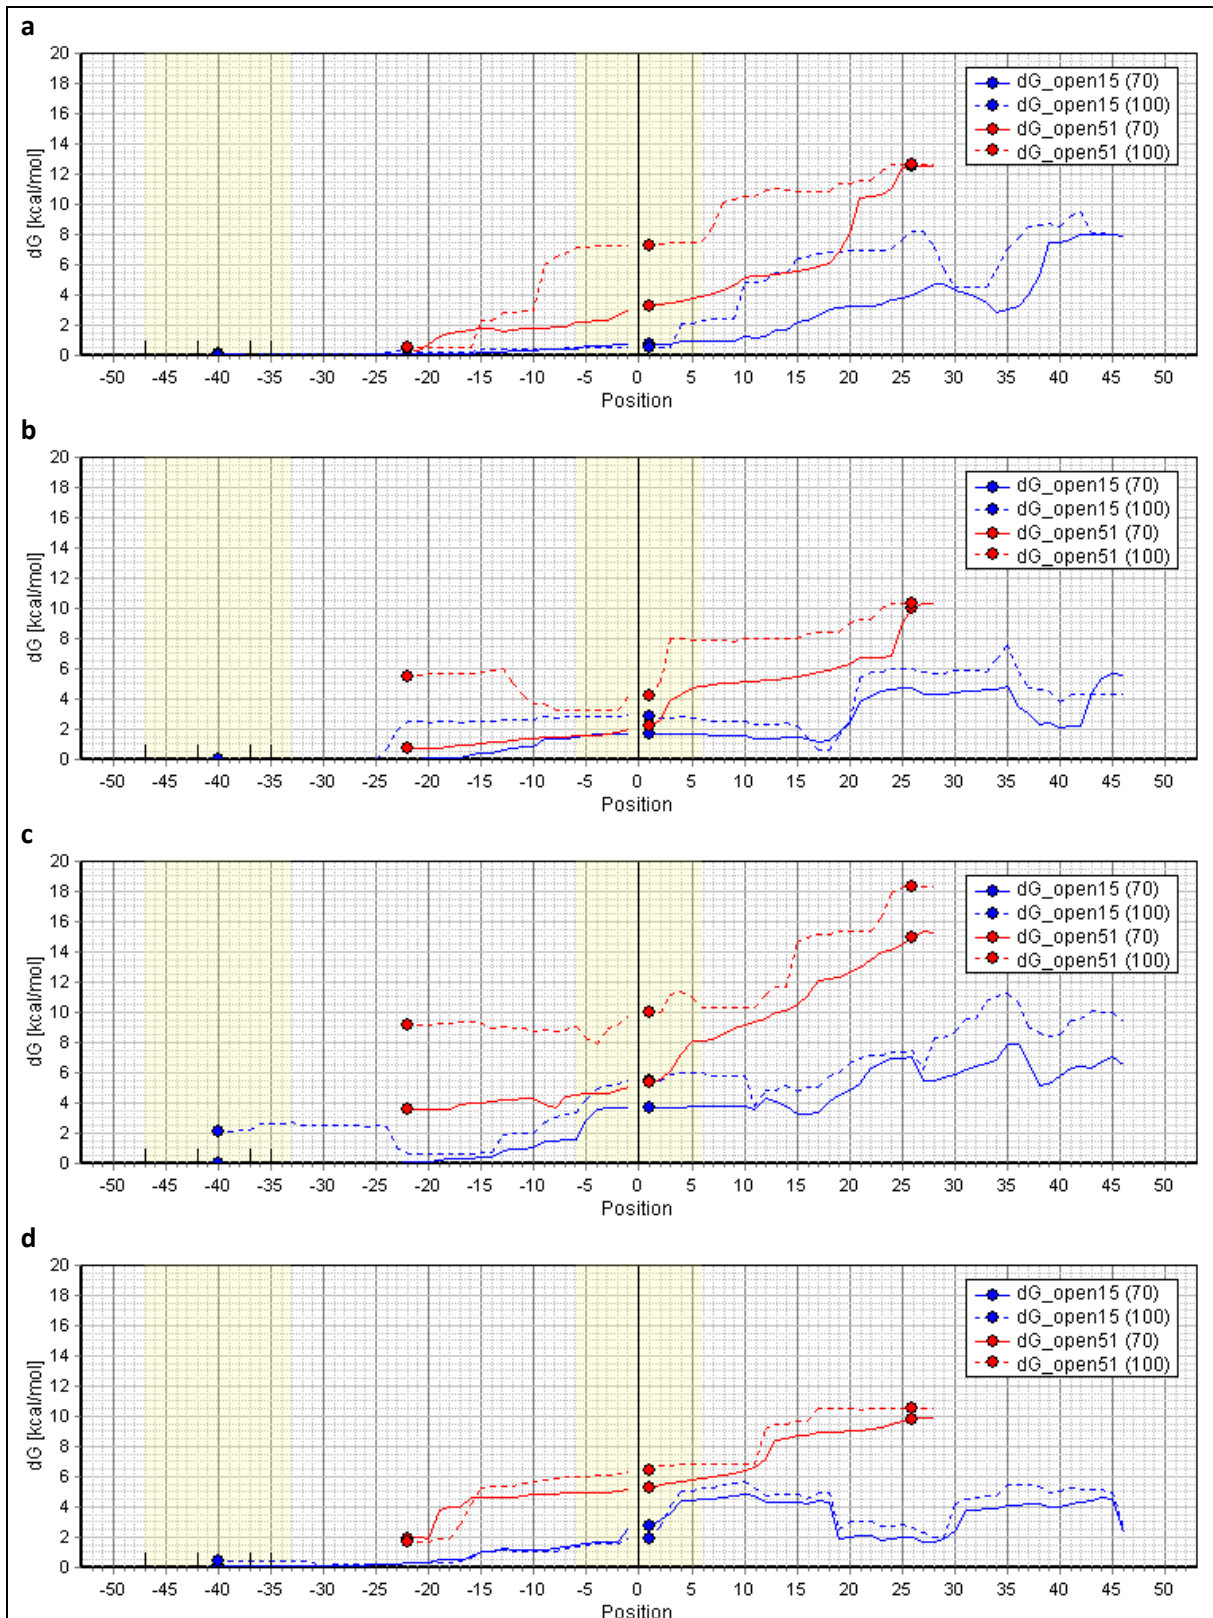

**Supplementary Figure 4: Opening energies for the translation initiation sites of cluster C3.** Opening energies to make a stretch of 15 nt and 51 nt accessible are drawn as blue and red lines, respectively. Solid and dashed lines correspond to a maximal allowed base pair span of 70 nt and 100 nt, respectively. Position denotes the center of the stretch. The yellow regions correspond to the first stretch at the cap from -47 to -33 (Cap<sub>15</sub>) and the Kozak sequence. Alternative TSSs are shown as vertical bars<sup>41</sup>. Control points are drawn at -40 (Cap<sub>15</sub>), the first 51 nt-stretch at -22 (UTR<sub>51</sub>), the ATG at +1 (ATG<sub>15</sub>, ATG<sub>51</sub>), and the center of the last 51 nt-stretch at +26 (CDS<sub>51</sub>). a) *pfa1*. b) *pfa2*. c) *pfa3*. d) *ppt*.

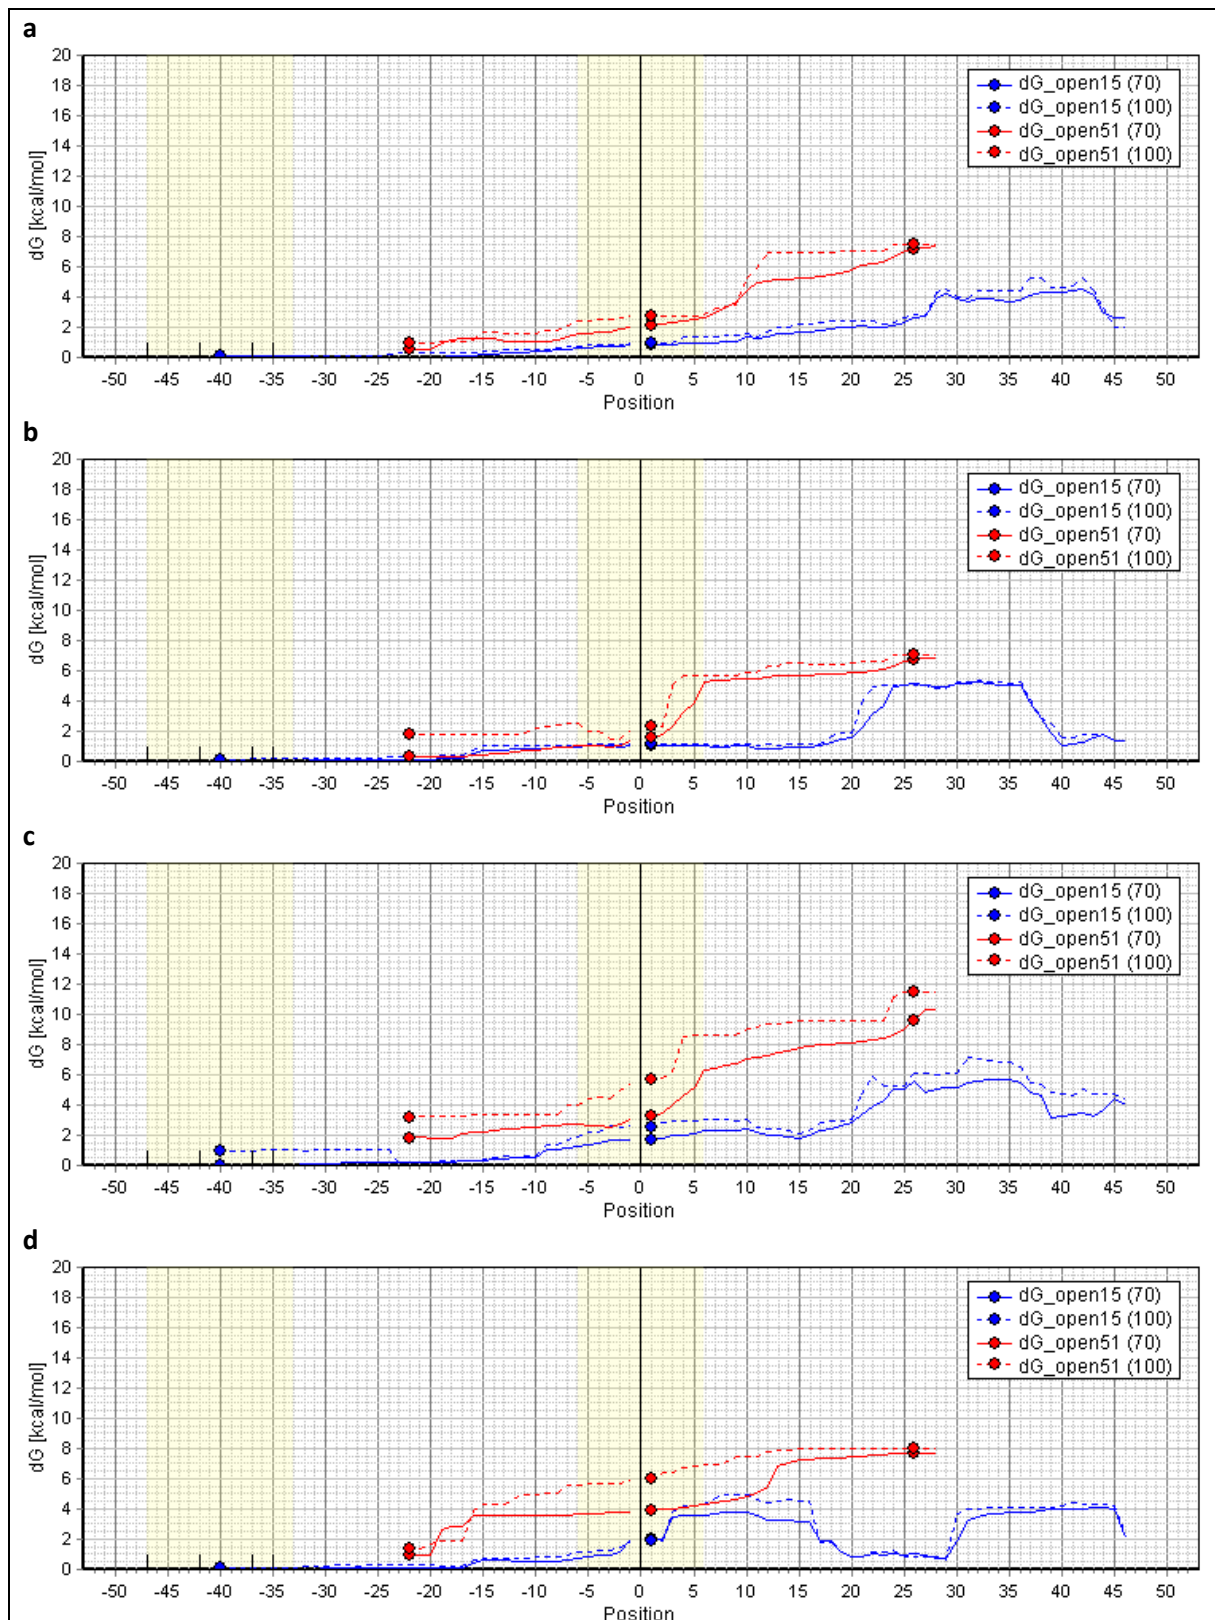

**Supplementary Figure 5: Opening energies for the translation initiation sites of cluster C3\_mod 5'.** Opening energies to make a stretch of 15 nt and 51 nt accessible are drawn as blue and red lines, respectively. Solid and dashed lines correspond to a maximal allowed base pair span of 70 nt and 100 nt, respectively. Position denotes the center of the stretch. The yellow regions correspond to the first stretch at the cap from -47 to -33 (Cap<sub>15</sub>) and the Kozak sequence. Alternative TSSs are shown as vertical bars<sup>41</sup>. Control points are drawn at -40 (Cap<sub>15</sub>), the first 51 nt-stretch at -22 (UTR<sub>51</sub>), the ATG at +1 (ATG<sub>15</sub>, ATG<sub>51</sub>), and the center of the last 51 nt-stretch at +26 (CDS<sub>51</sub>). For details see Supplementary Table 2. a) *pfa1*. b) *pfa2*. c) *pfa3*. d) *ppt*.

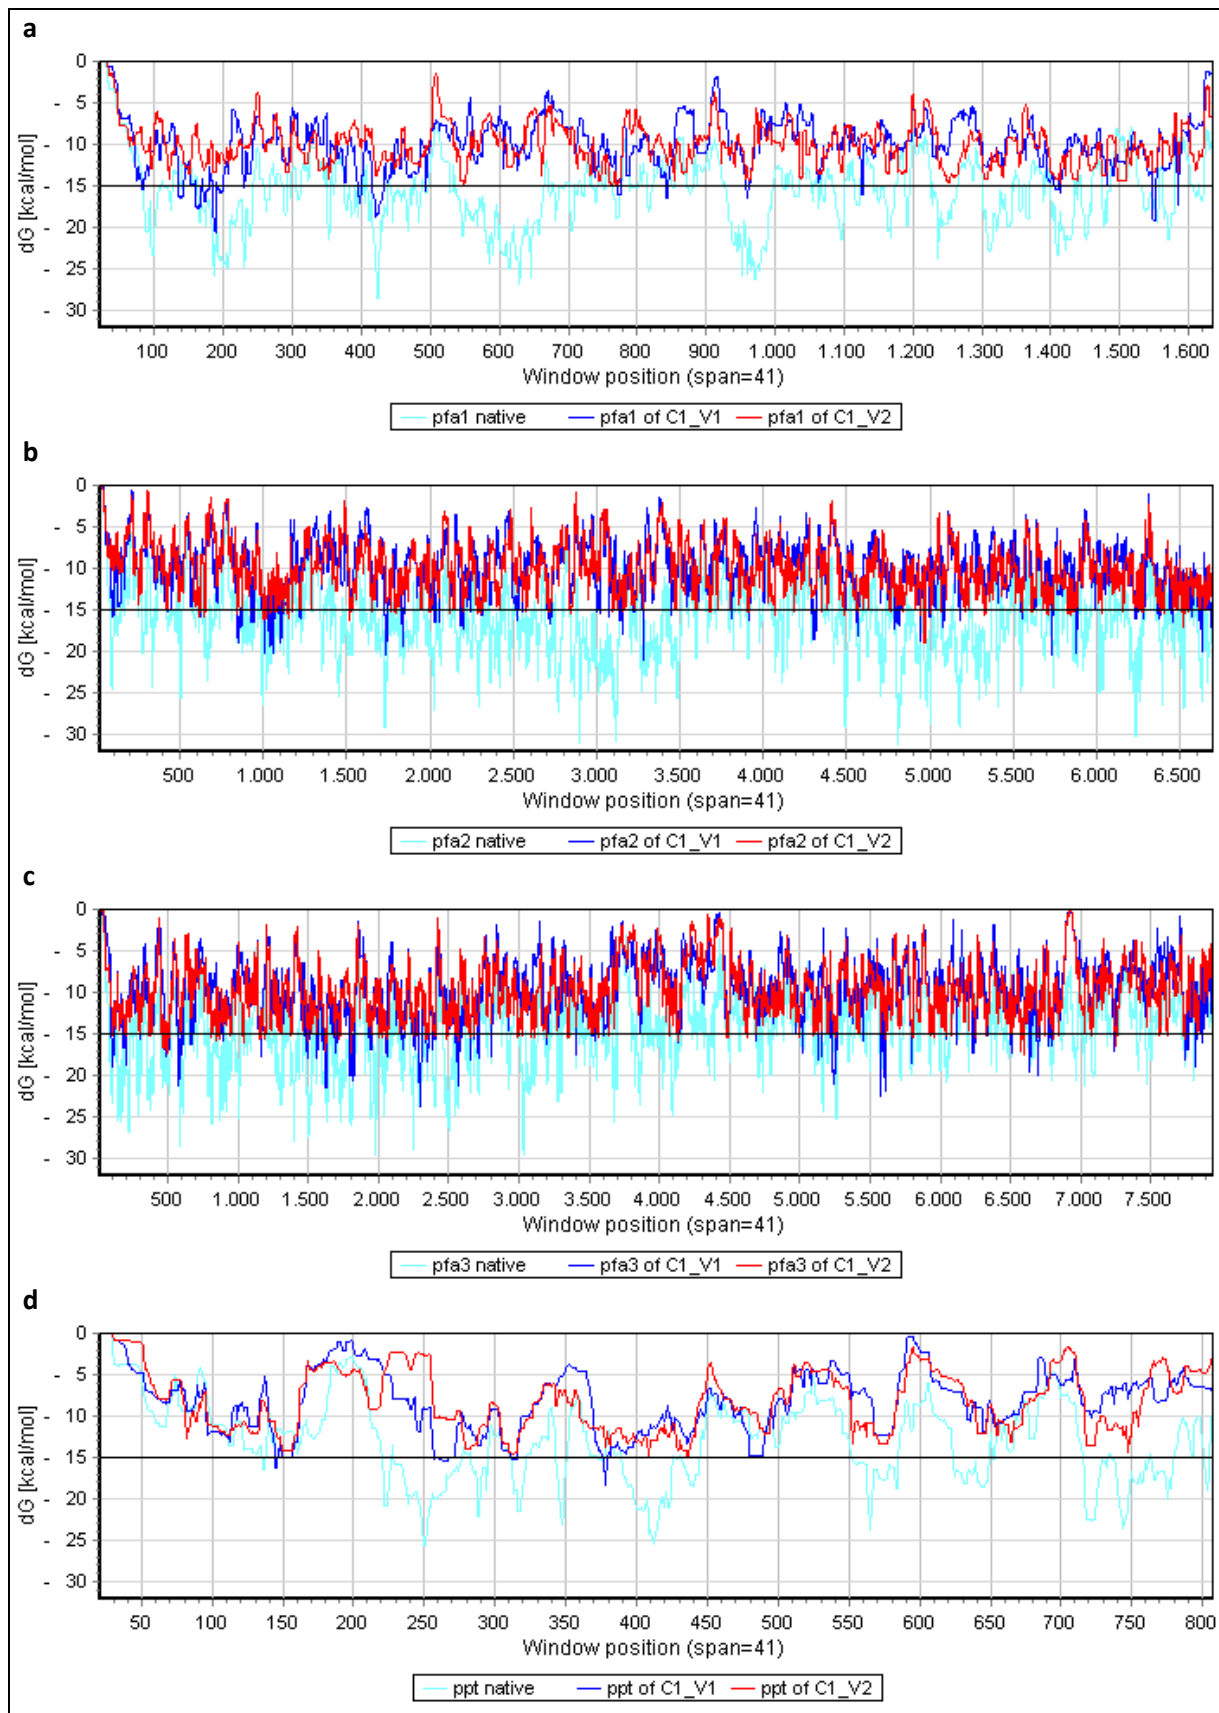

**Supplementary Figure 6: Local ensemble free energies calculated from a window of 41 nt of the mRNAs of genes *pfa1*, *pfa2*, *pfa3*, and *ppt* from the native *pfa* biosynthetic gene cluster and from the artificial *pfa* biosynthetic gene clusters C1\_V1 and C1\_V2. About 95 % of all 41 nt-windows in the genome of *Yarrowia lipolytica* show values above a threshold of -15 kcal/mol. The positions are centered at the windows. a) *pfa1*. b) *pfa2*. c) *pfa3*. d) *ppt*.**

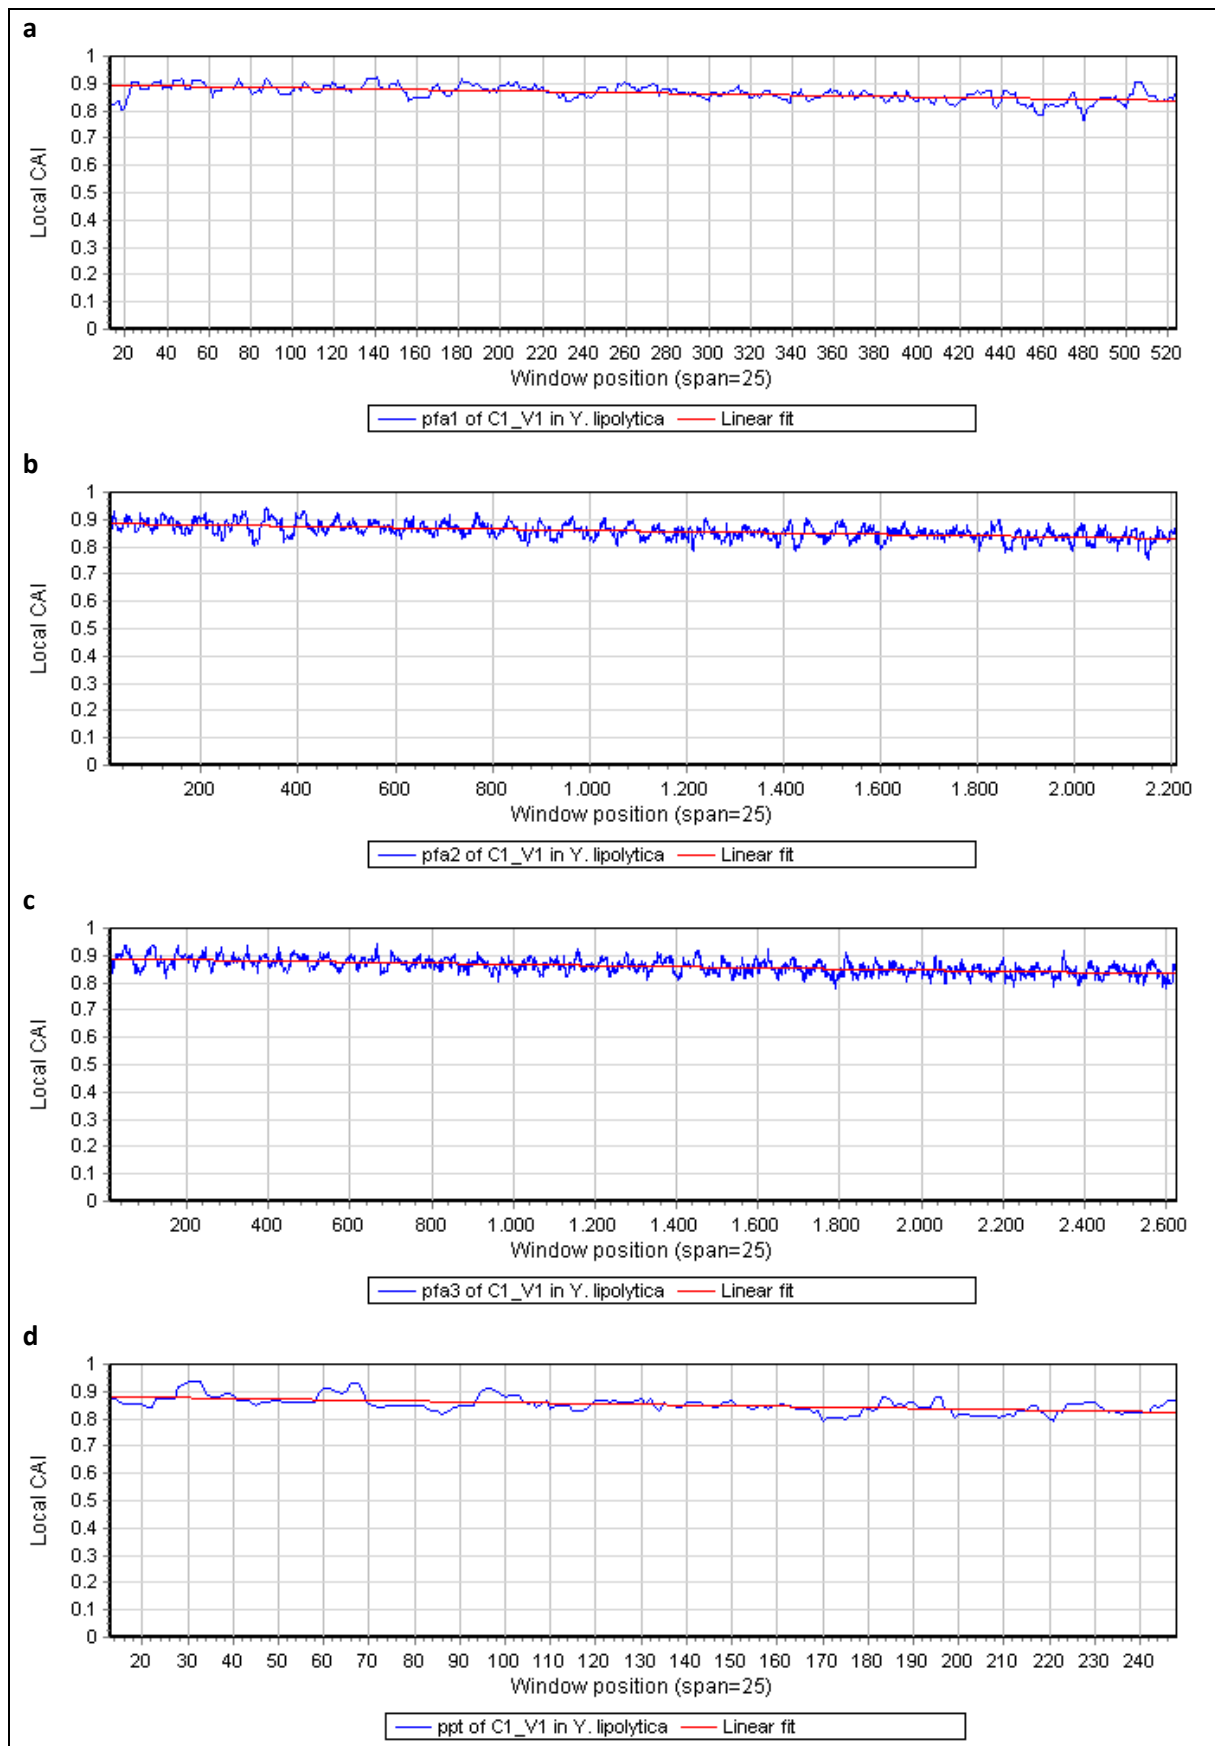

**Supplementary Figure 7: Course of the local codon adaptation index (CAI) of the coding sequences of genes *pfa1*, *pfa2*, *pfa3*, and *ppt* from the artificial *pfa* biosynthetic gene clusters C1\_V1. Window width is 25 codons. The gradient between start and stop codon of each coding sequence was adjusted to 0.05. The genomic codon table was used for formal CAI calculation. a) *pfa1*. b) *pfa2*. c) *pfa3*. d) *ppt*.**

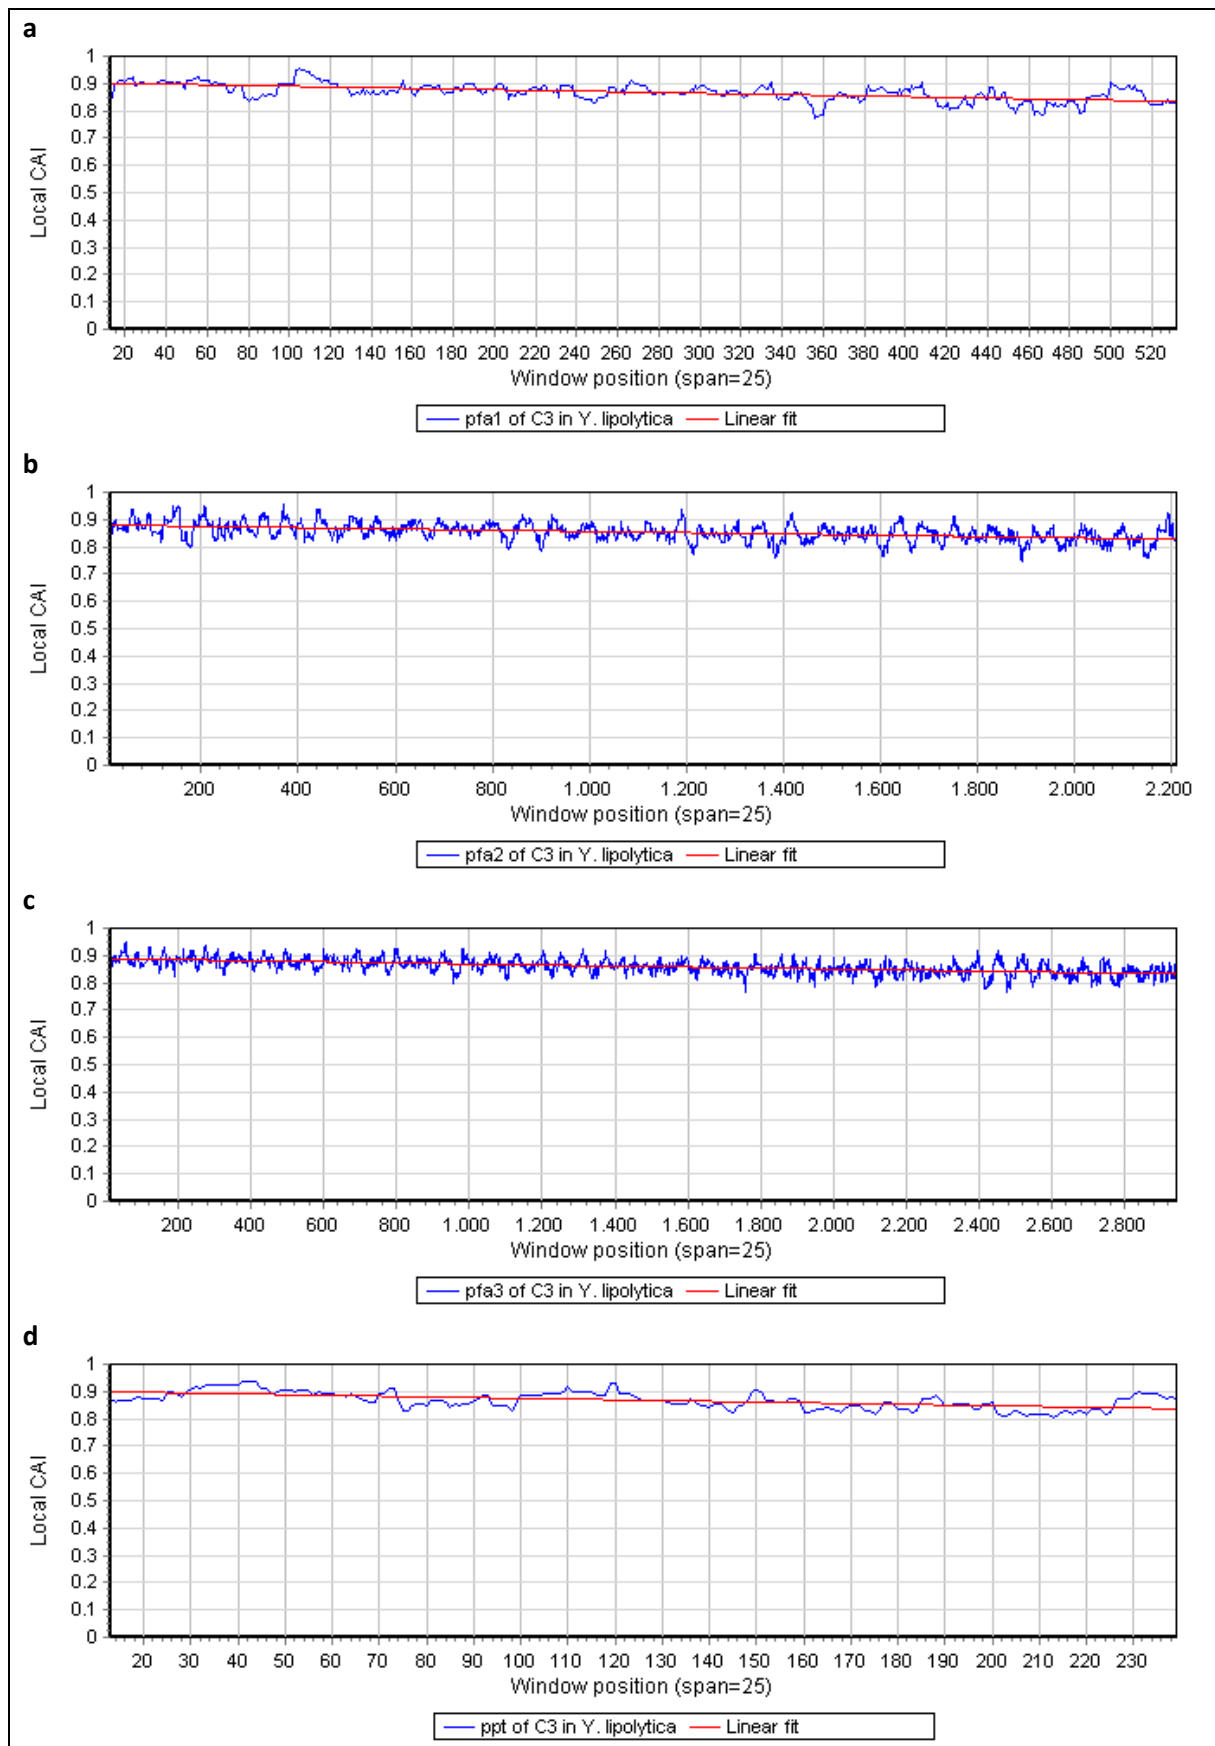

**Supplementary Figure 8: Course of the local codon adaptation index (CAI) of the coding sequences of genes *pfa1*, *pfa2*, *pfa3*, and *ppt* from the artificial *pfa* biosynthetic gene clusters C3. Window width is 25 codons. The gradient between start and stop codon of each coding sequence was adjusted to 0.05. The genomic codon table was used for formal CAI calculation. a) *pfa1*. b) *pfa2*. c) *pfa3*. d) *ppt*.**

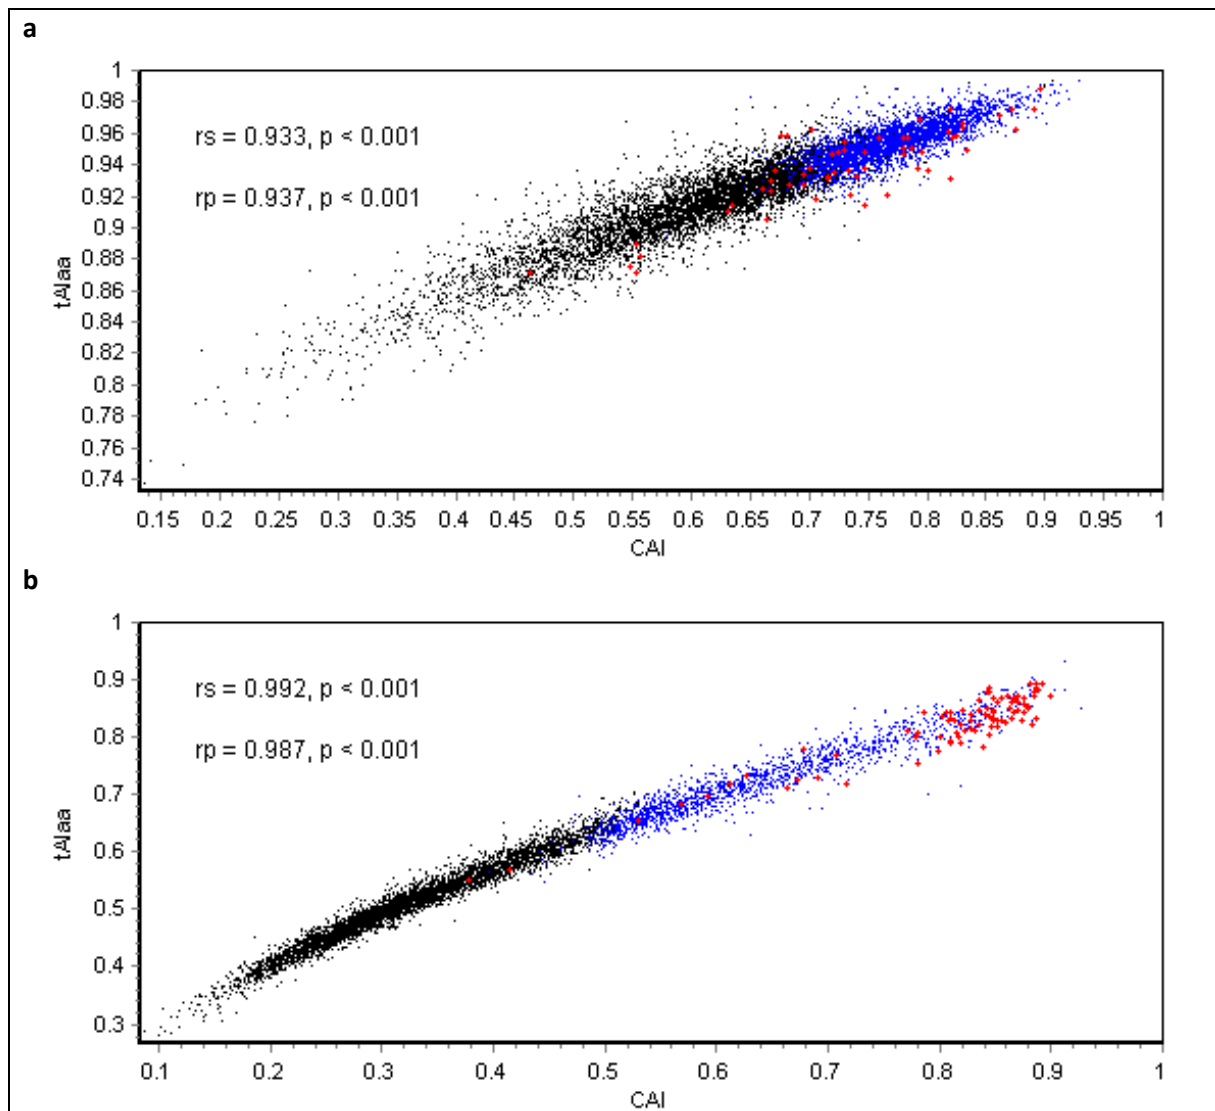

**Supplementary Figure 9: Relationship between CAI and tAIaa. a) *Aetherobacter fasciculatus* (SBSr002). b) *Yarrowia lipolytica*.** CAI/tAIaa values for every CDS in the genome are represented by black dots. Data points for the automatically generated control set are represented by blue dots and the data points for the reference sets are shown in red. The blue cluster, which in the case of *Y. lipolytica* consists of the set of genes that were used to build the codon table for the optimization of the synonymous codon fractions of version C1\_V2, is always located in the upper half of the scatter plot. The reference set of, in the case of *Y. lipolytica* predominantly and in the case of *A. fasciculatus* (SBSr002) exclusively, ribosomal genes, is clearly separated from the bulk for the *Y. lipolytica* sequences. *A. fasciculatus* (SBSr002) shows a more blurred picture in this respect. To avoid an amino acid dependency, a normalized variant of the tAI – tAIaa<sup>20,32,33</sup> (weights scaled to the highest weight within each codon group representing a certain amino acid) - was used. Additionally, analogous to the CAI, Met and Trp are omitted from the calculation. The Percudani-rule<sup>35</sup> for eukaryotes was used for *Y. lipolytica* to determine possible codon-anticodon matchings. Inosine modification for the base<sub>34</sub> of the anticodon for C-ending codons of Ala, Ile, Leu, Pro, Arg, Ser, Thr, and Val are assumed. A G:U-wobble is used by Cys, Asp, Phe, His, Asn, and Tyr. Additionally, Gly needs a G:U- and a U:G-wobble. Because of uncertainty about tRNA base modifications in the *A. fasciculatus* tRNAome, also only mandatory wobble interactions were taken into account. Only G:U-wobble interactions are needed, besides the common I:C interaction for Arg. Specificities for watson-crick near I:C interactions were set to 1, all other codon-anticodon interactions using a wobble for the sake of comparability to 0.5. For *Y. lipolytica* 94 % of the codons with the highest adaptiveness scores per synonymous codon group have also the highest tAIaa-weights per group. The corresponding value for *A. fasciculatus* (SBSr002) is 78 %. An analogous examination for the lowest scores yields 89 % and 67 %, respectively<sup>36</sup>. Remark: the choice of much smaller weights stretches the tAIaa-range of the plot for *A. fasciculatus* (SBSr002).

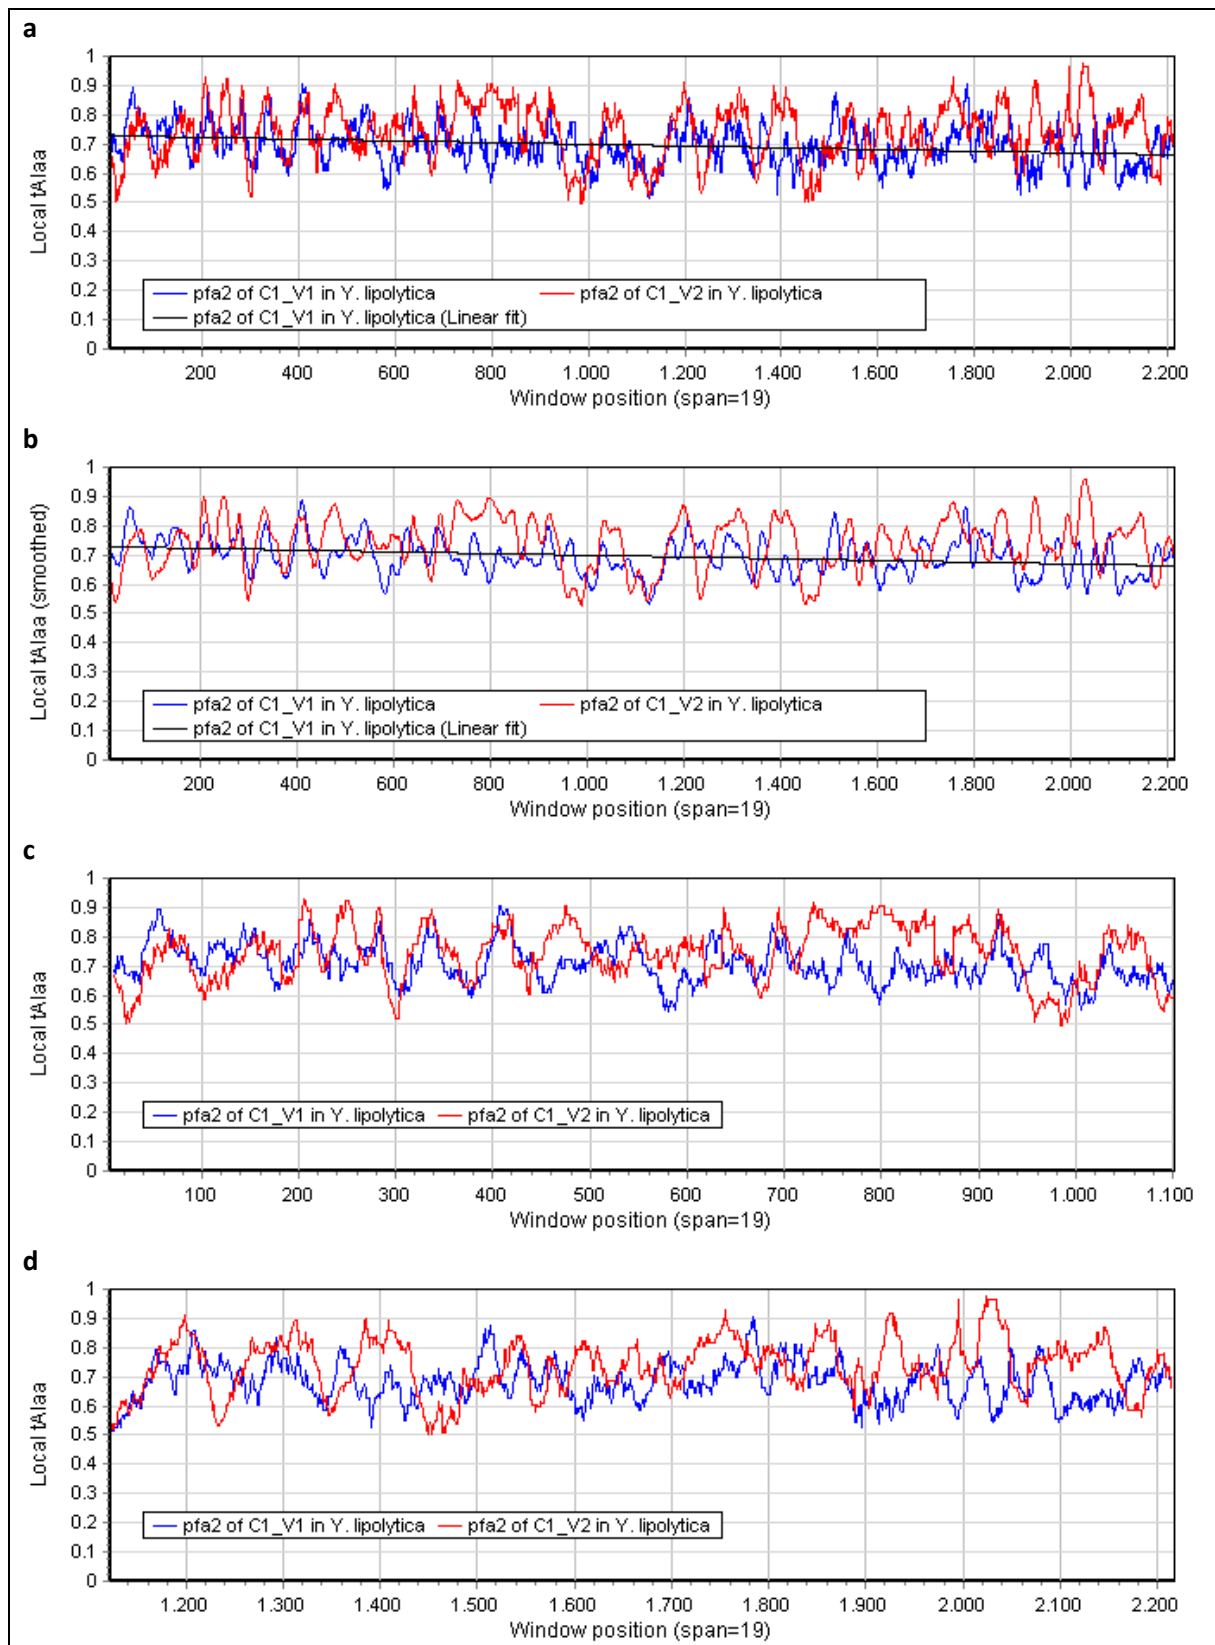

**Supplementary Figure 10: Comparison of *pfa2* from the artificial *pfa* biosynthetic gene clusters C1\_V1 and C1\_V2 based on tRNA adaptation to *Yarrowia lipolytica* CLIB122.** (a) *pfa2*. (b) *pfa2* smoothed. (c) 5'-half of *pfa2*. (d) 3'-half of *pfa2*. For the C1\_V1 coding sequence of *pfa2* (blue lines) a linear fit is added in (a) and (b), respectively, to show the reproduction of the initially envisioned gradient. The course of the local tAIaa of version C1\_V2 is shown in red. In (c) and (d) a detail view of the first and second half of the CDS is shown.



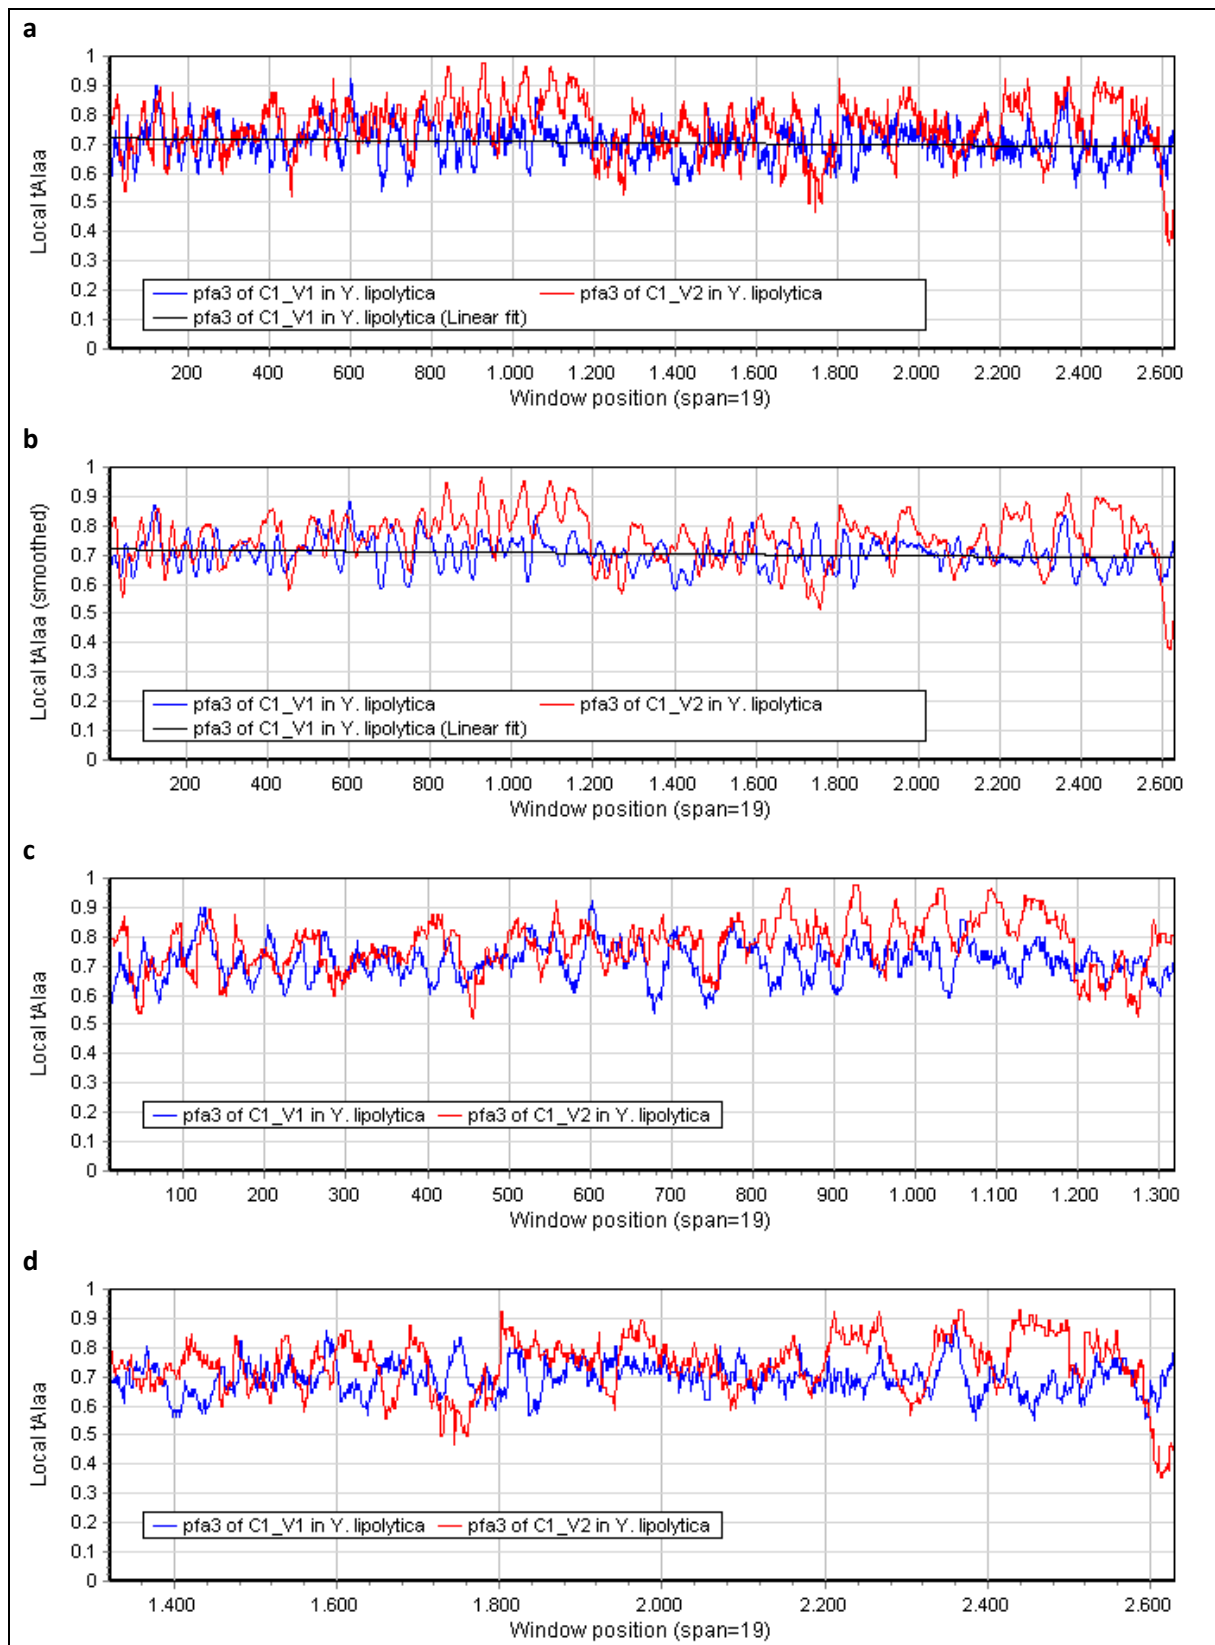

**Supplementary Figure 11: Comparison of *pfa3* from the artificial *pfa* biosynthetic gene clusters C1\_V1 and C1\_V2 based on tRNA adaptation to *Yarrowia lipolytica* CLIB122.** (a) *pfa3*. (b) *pfa3* smoothed. (c) 5'-half of *pfa3*. (d) 3'-half of *pfa3*. For the C1\_V1 coding sequence of *pfa3* (blue lines) a linear fit is added in (a) and (b), respectively, to show the reproduction of the initially envisioned gradient. The course of the local tAIaa of version C1\_V2 is shown in red. In (c) and (d) a detail view of the first and second half of the CDS is shown.

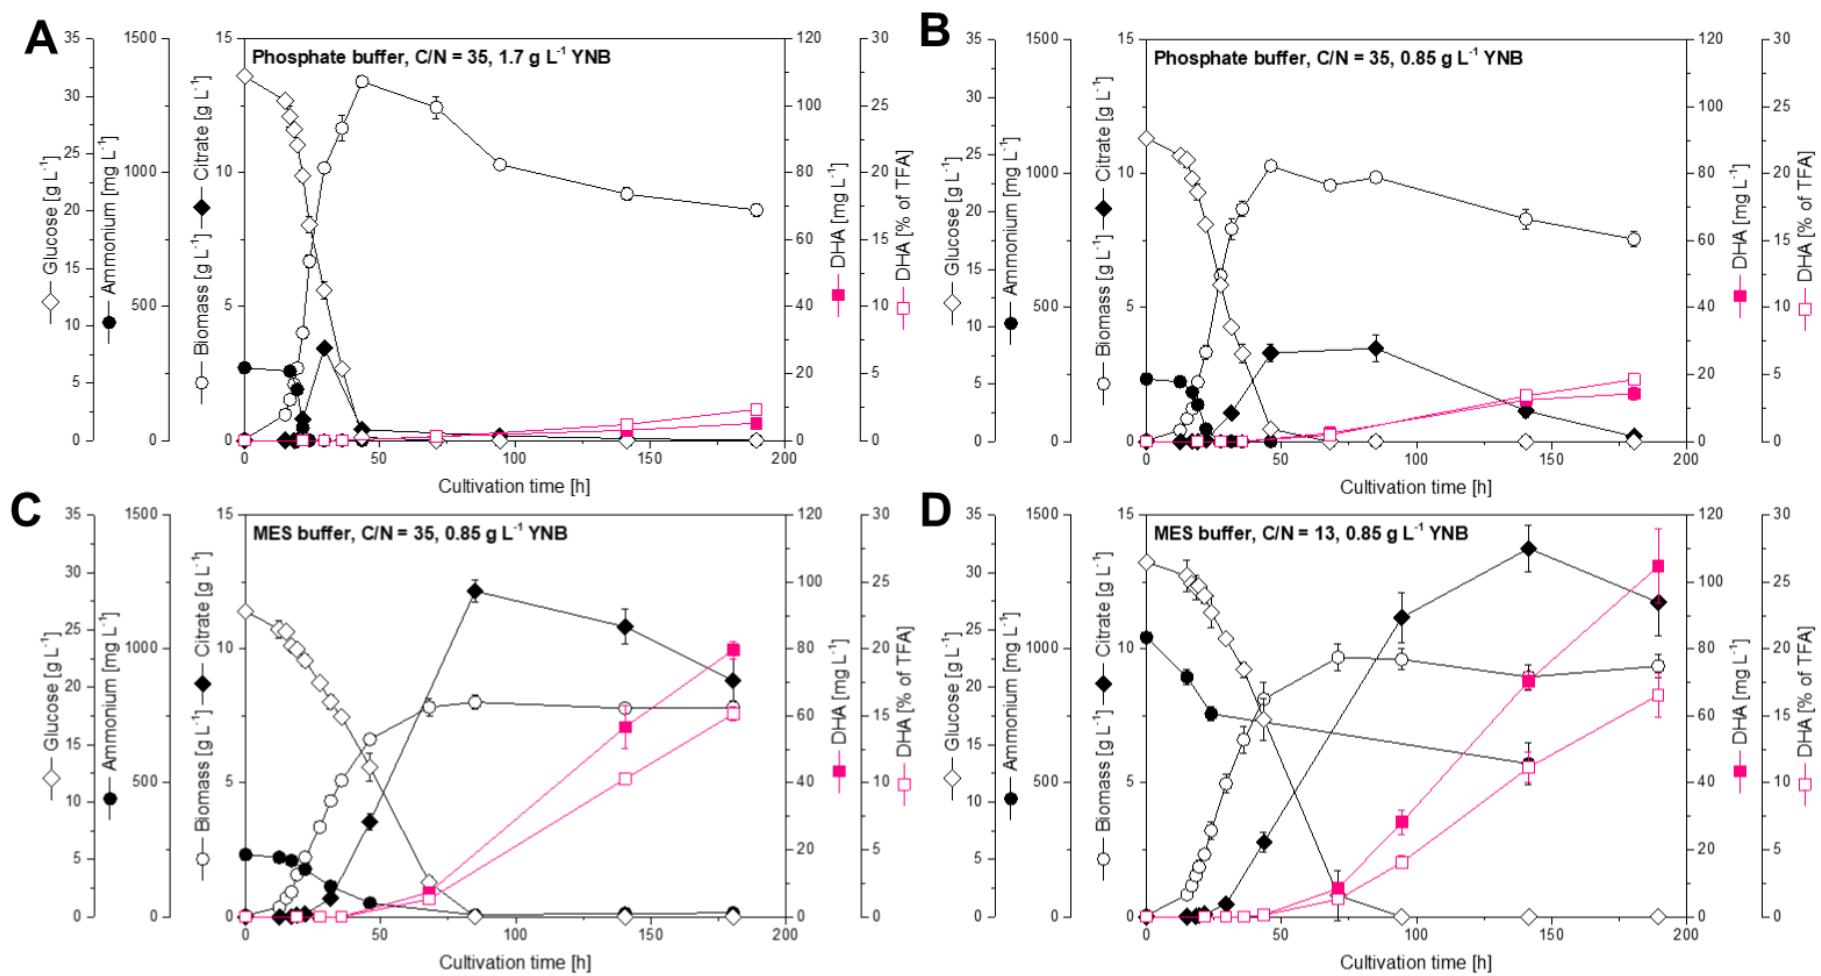

**Supplementary Figure 12: DHA production improvement in *Y. lipolytica* Po1h::Af4 based on an optimization of medium composition.** Shake flask cultivations were carried out in triplicates (n = 3). Source data are provided as a Source Data file.

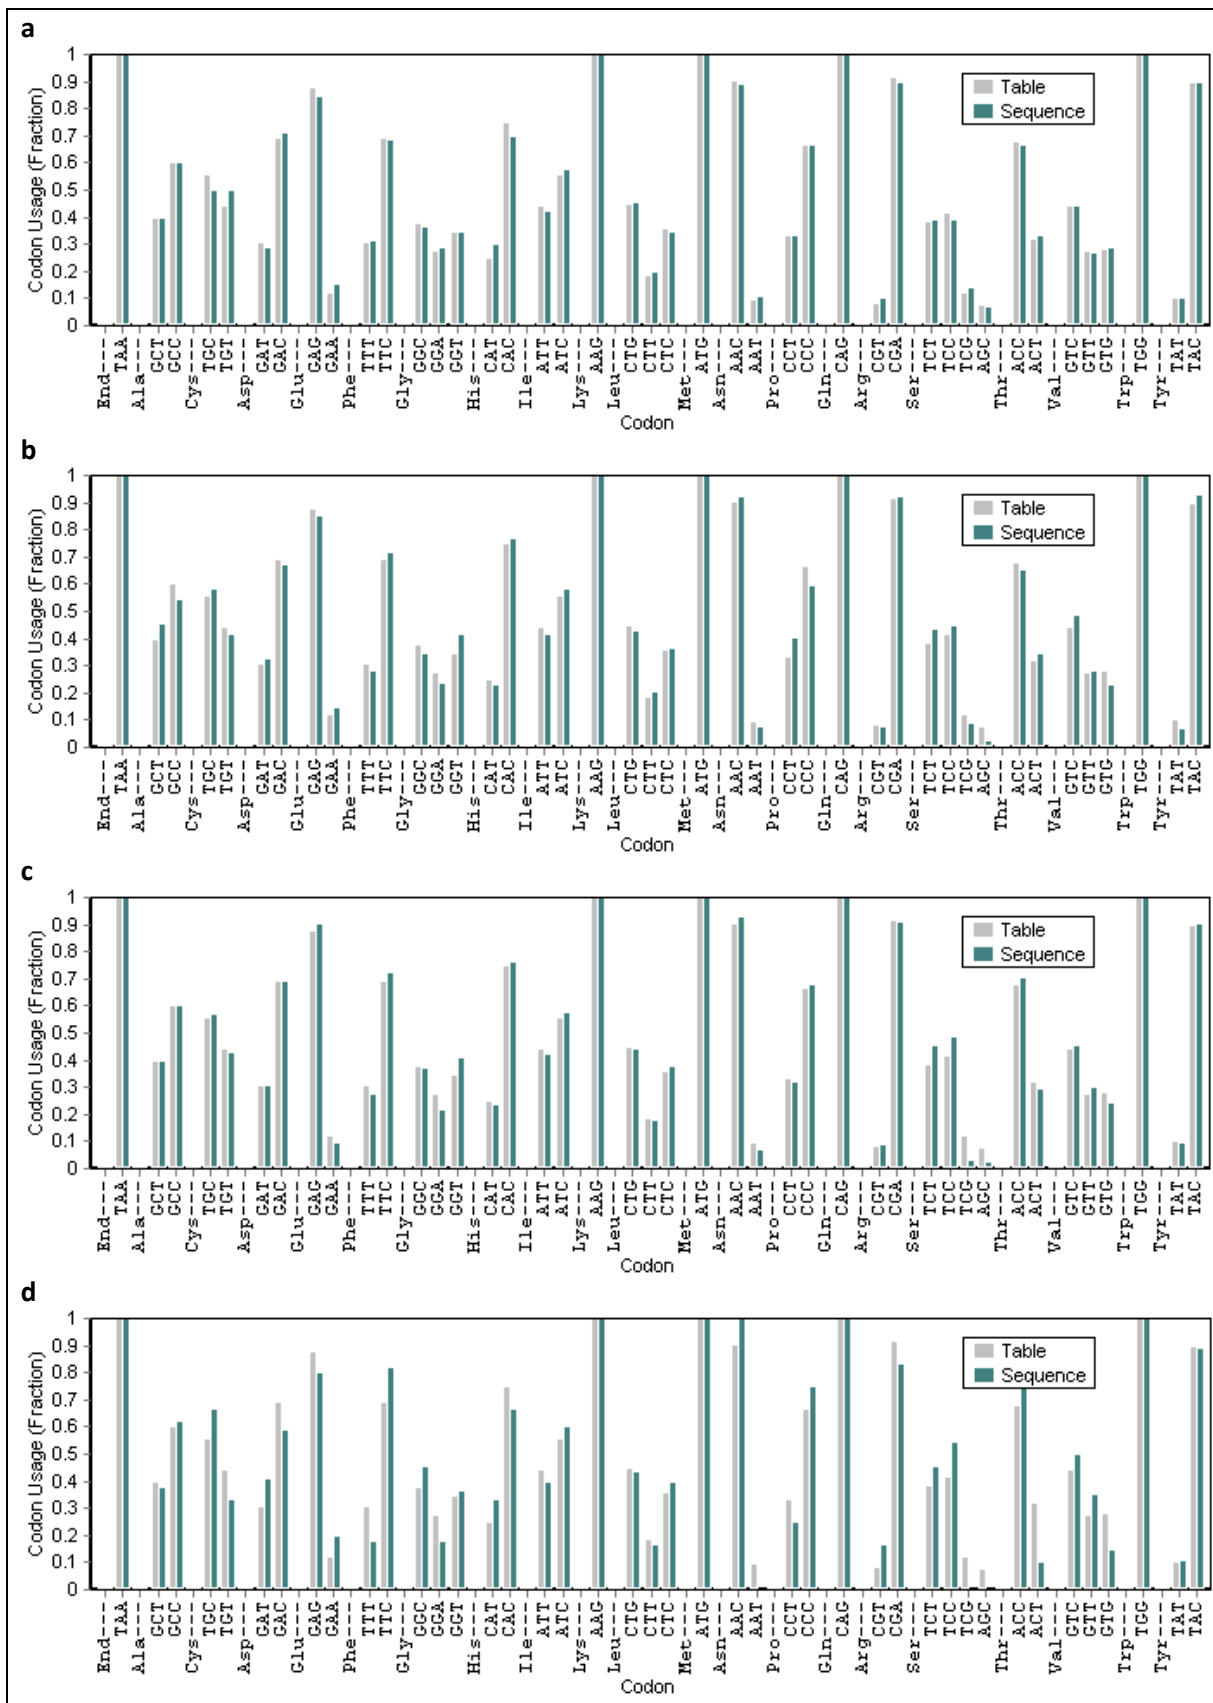

**Supplementary Figure 13: Adaptation of synonymous codon usage frequencies of the artificial *pfa* gene cluster C1\_V2.** The 20 sense codons with the lowest relative adaptiveness values according to Supplementary Table 14 are omitted from the graph. (a) *pfa1*. (b) *pfa2*. (c) *pfa3*. (d) *ppt*.

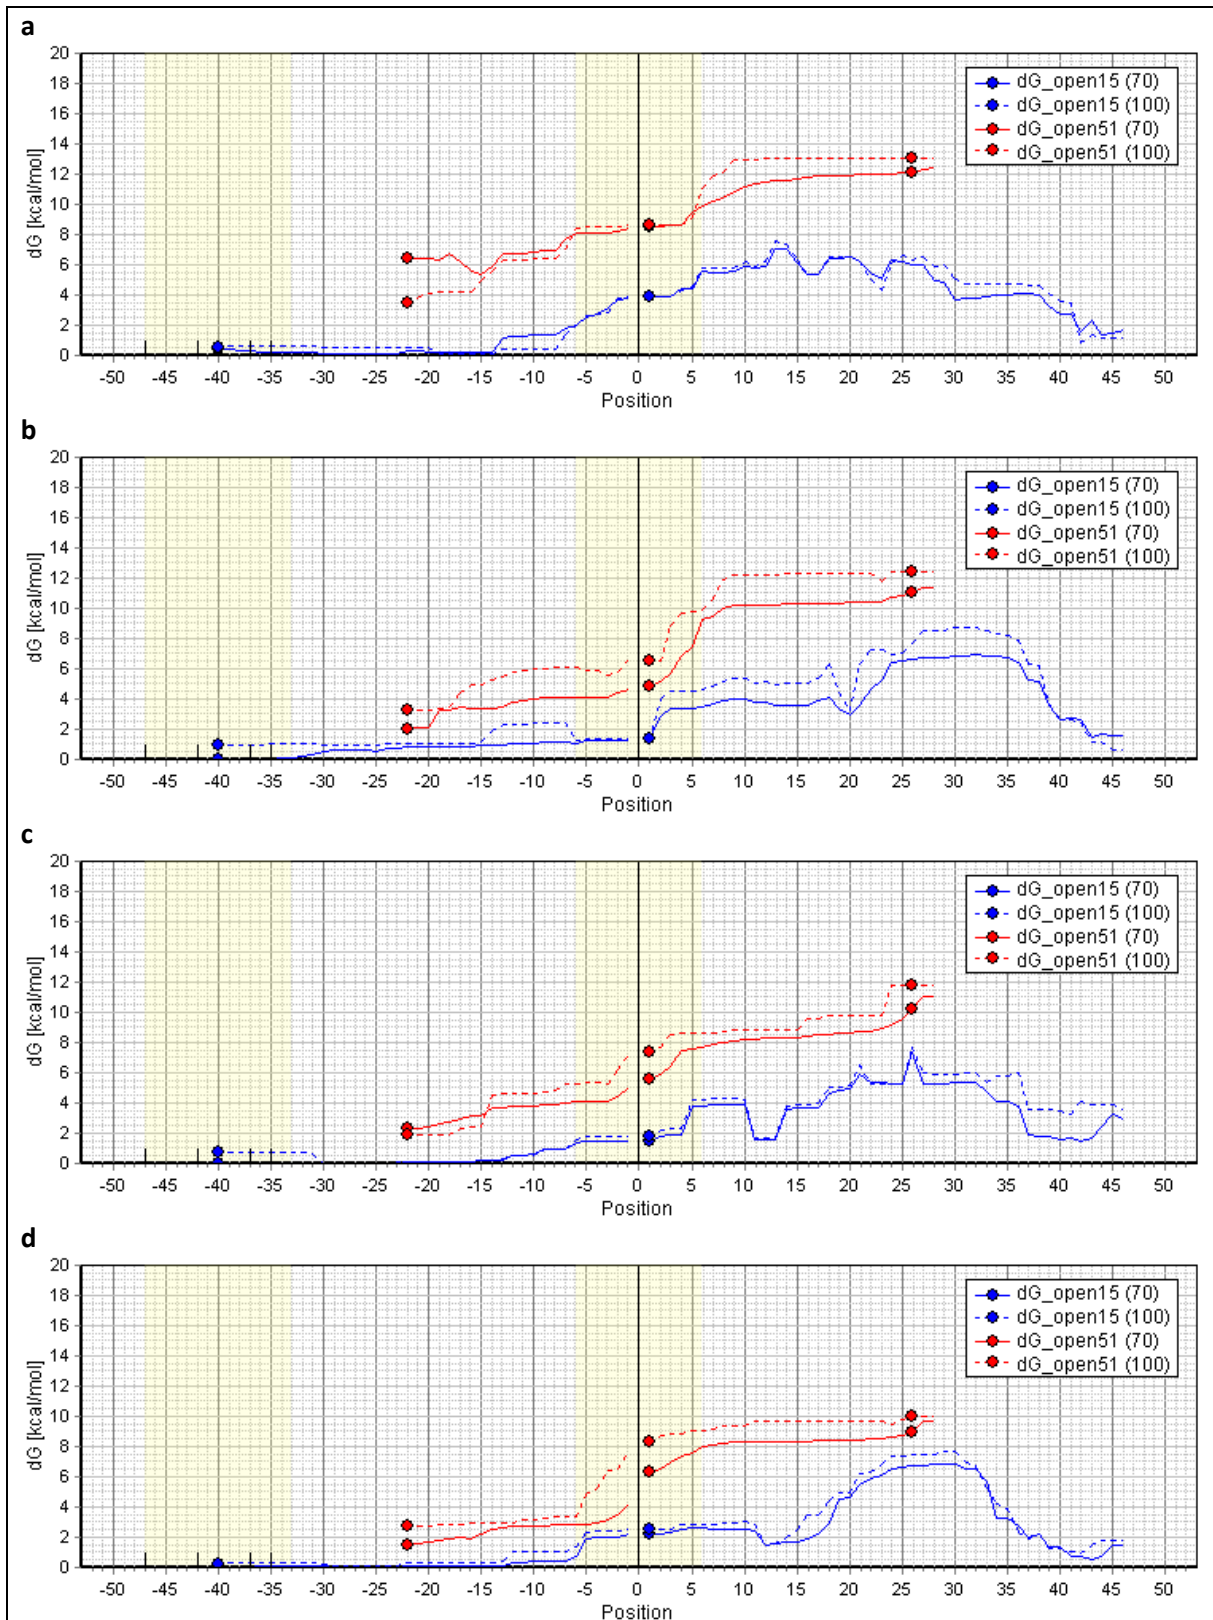

**Supplementary Figure 14: Opening energies for the translation initiation sites of cluster C1\_V2.** Opening energies to make a stretch of 15 nt and 51 nt accessible are drawn as blue and red lines, respectively. Solid and dashed lines correspond to a maximal allowed base pair span of 70 nt and 100 nt, respectively. Position denotes the center of the stretch. The yellow regions correspond to the first stretch at the cap from -47 to -33 (Cap<sub>15</sub>) and the Kozak sequence. Alternative TSSs are shown as vertical bars<sup>41</sup>. Control points are drawn at -40 (Cap<sub>15</sub>), the first 51 nt-stretch at -22 (UTR<sub>51</sub>), the ATG at +1 (ATG<sub>15</sub>, ATG<sub>51</sub>), and the center of the last 51 nt-stretch at +26 (CDS<sub>51</sub>). a) *pfa1*. b) *pfa2*. c) *pfa3*. d) *ppt*.

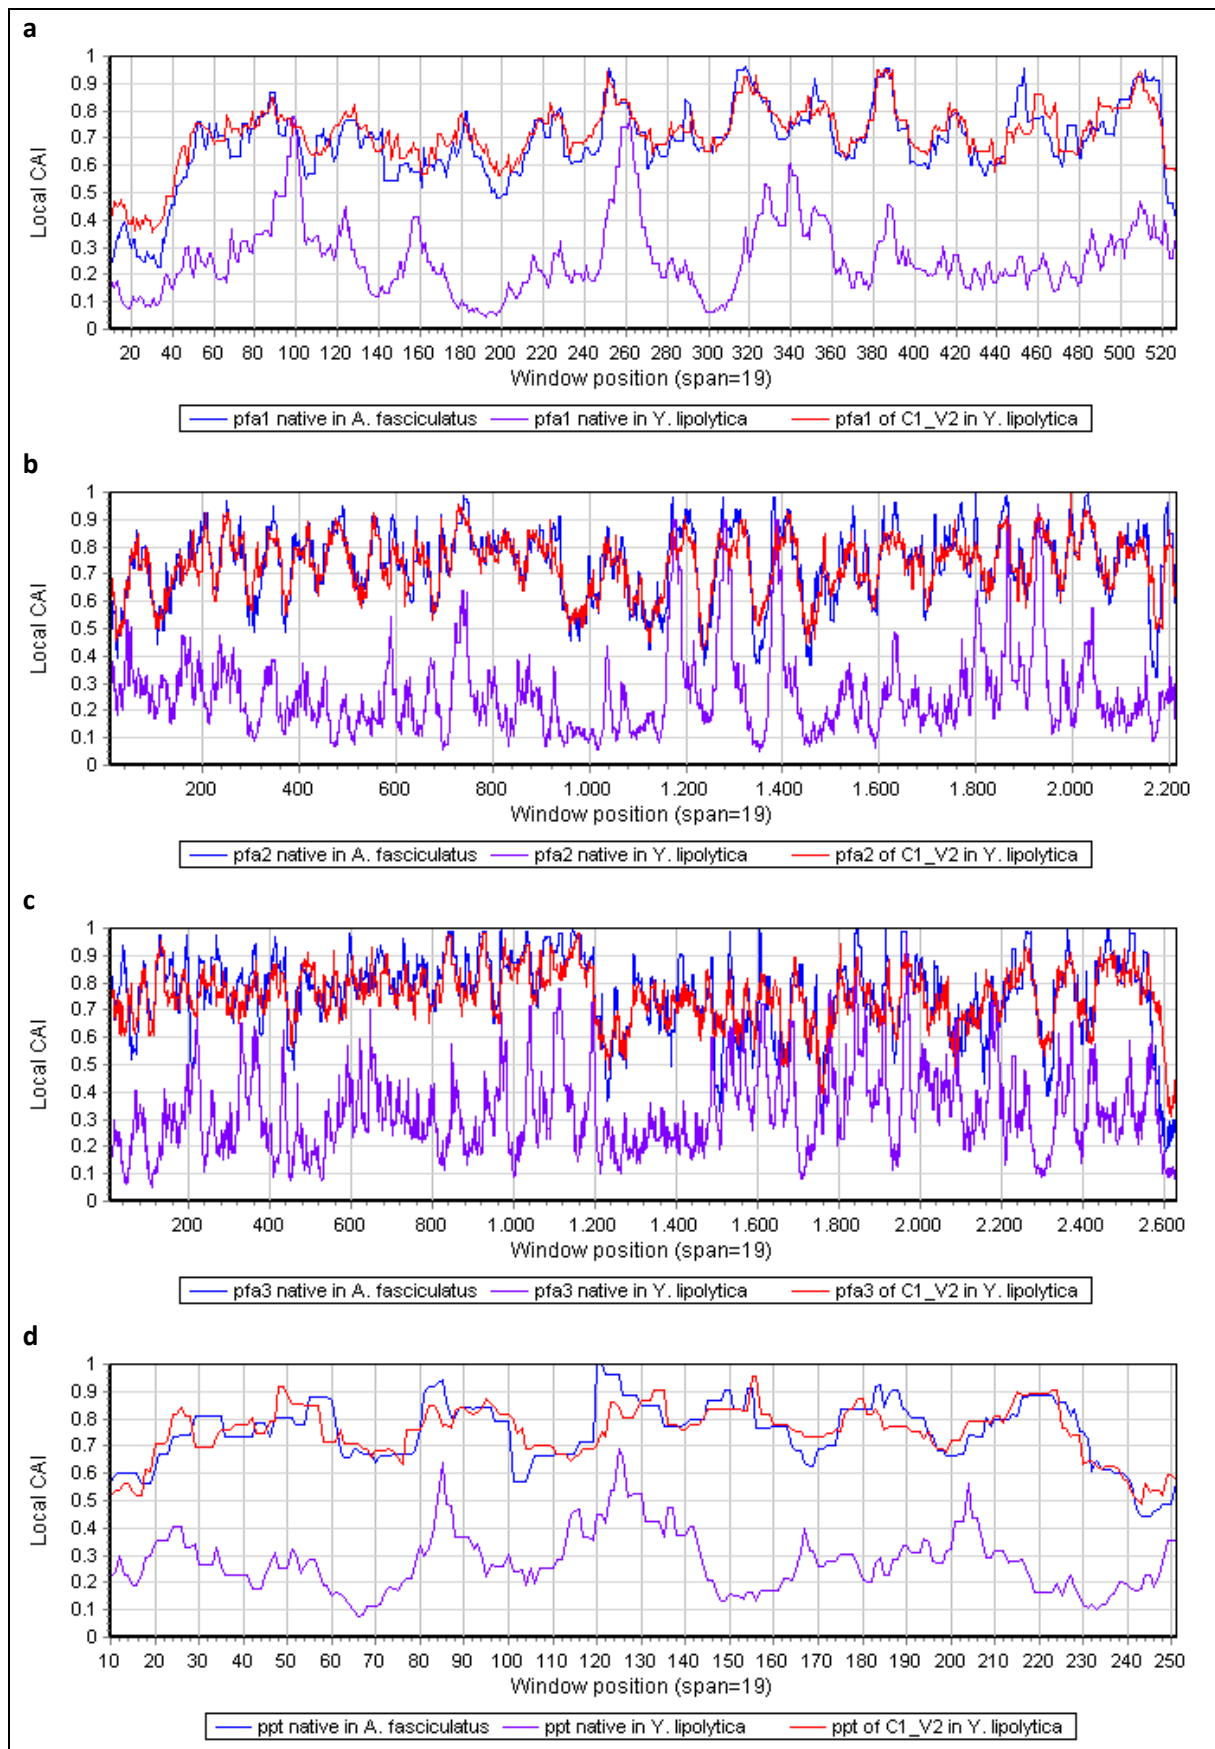

**Supplementary Figure 15: Course of the local codon adaptation index (CAI) of the coding sequences from the native *pfa* biosynthetic gene cluster in *Aetherobacter fasciculatus* (SBSr002) (blue), from the artificial *pfa* biosynthetic gene cluster C1\_V2 in *Yarrowia lipolytica* (red) and from the native *pfa* biosynthetic gene cluster in *Y. lipolytica* (violet). Window width is 19 codons. a) *pfa1*. b) *pfa2*. c) *pfa3*. d) *ppt*.**

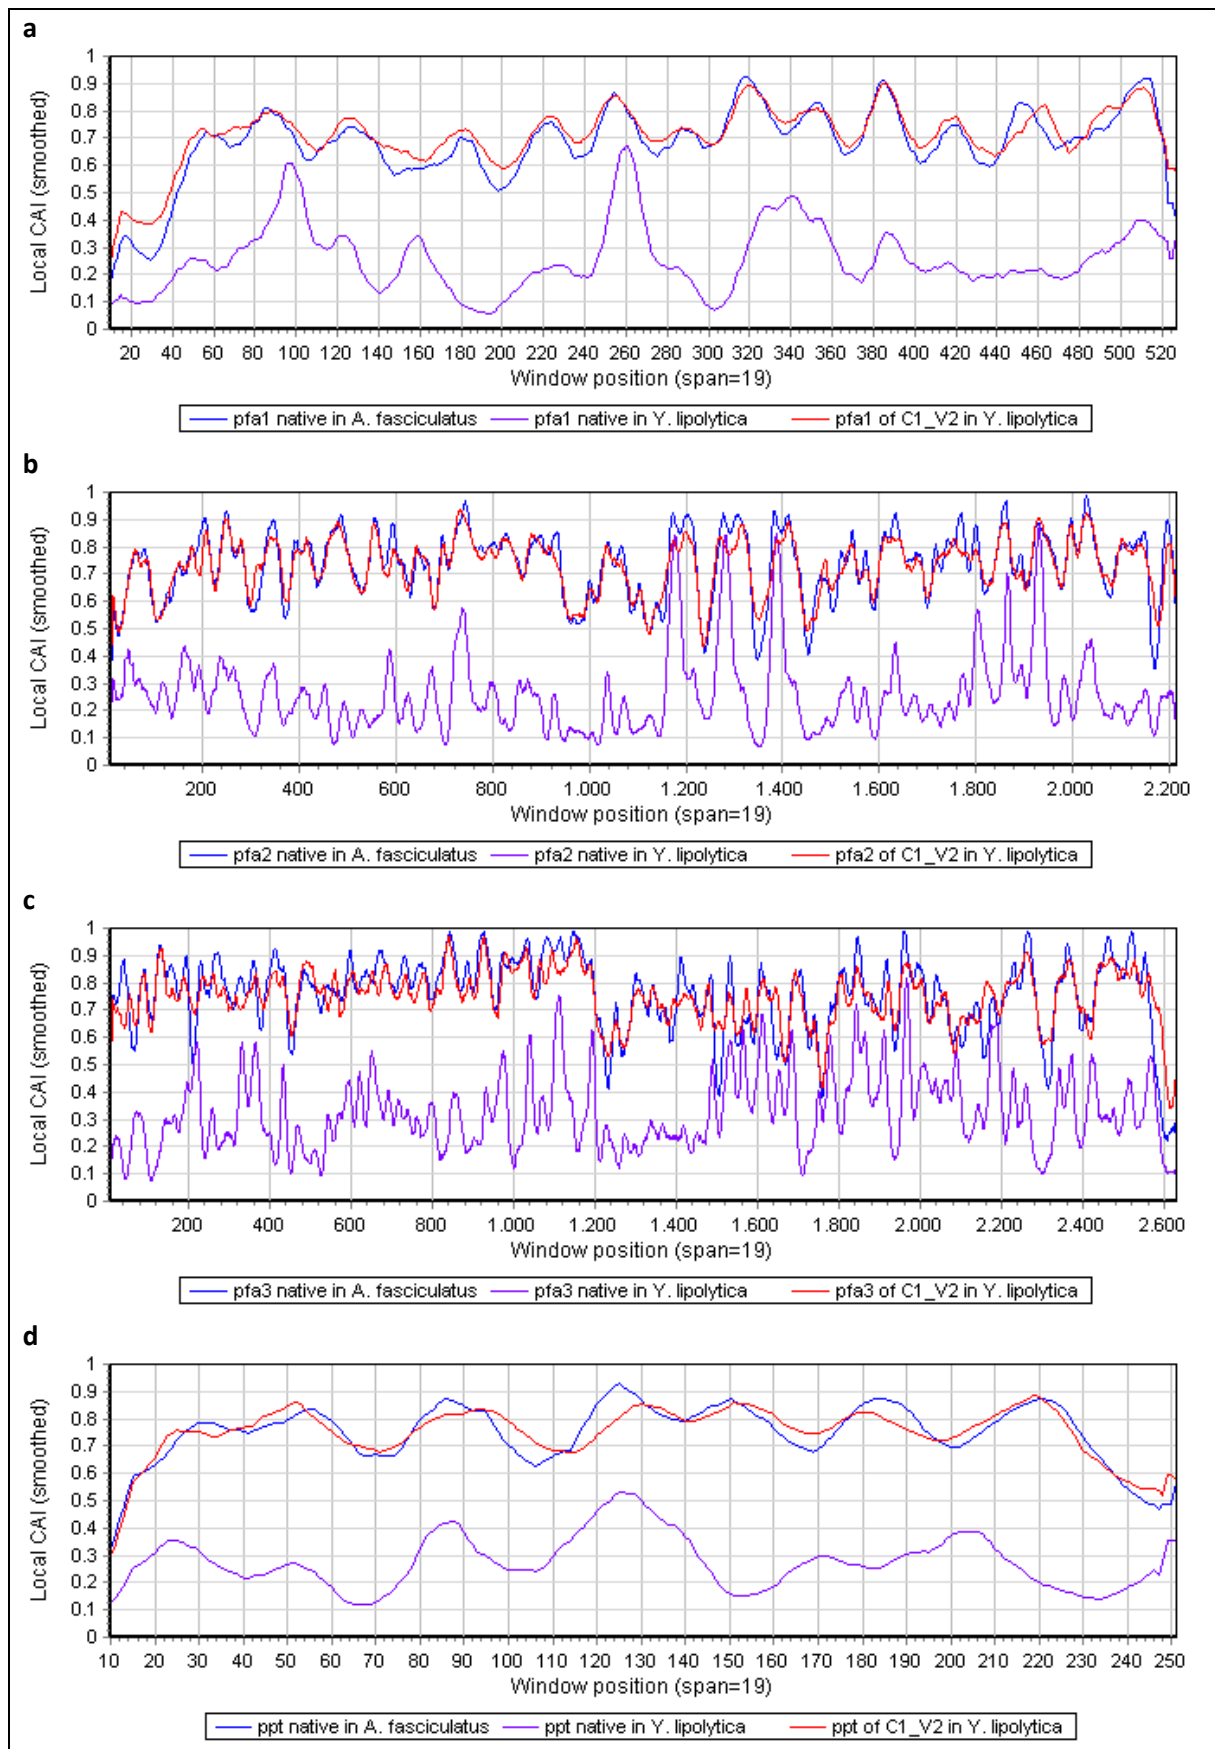

**Supplementary Figure 16: Smoothed course of the local codon adaptation index (CAI) of the coding sequences from the native *pfa* biosynthetic gene cluster in *Aetherobacter fasciculatus* (SBSr002) (blue), from the artificial *pfa* biosynthetic gene cluster C1\_V2 in *Yarrowia lipolytica* (red) and from the native *pfa* biosynthetic gene cluster in *Y. lipolytica* (violet). Window width is 19 codons. a) *pfa1*. b) *pfa2*. c) *pfa3*. d) *ppt*.**

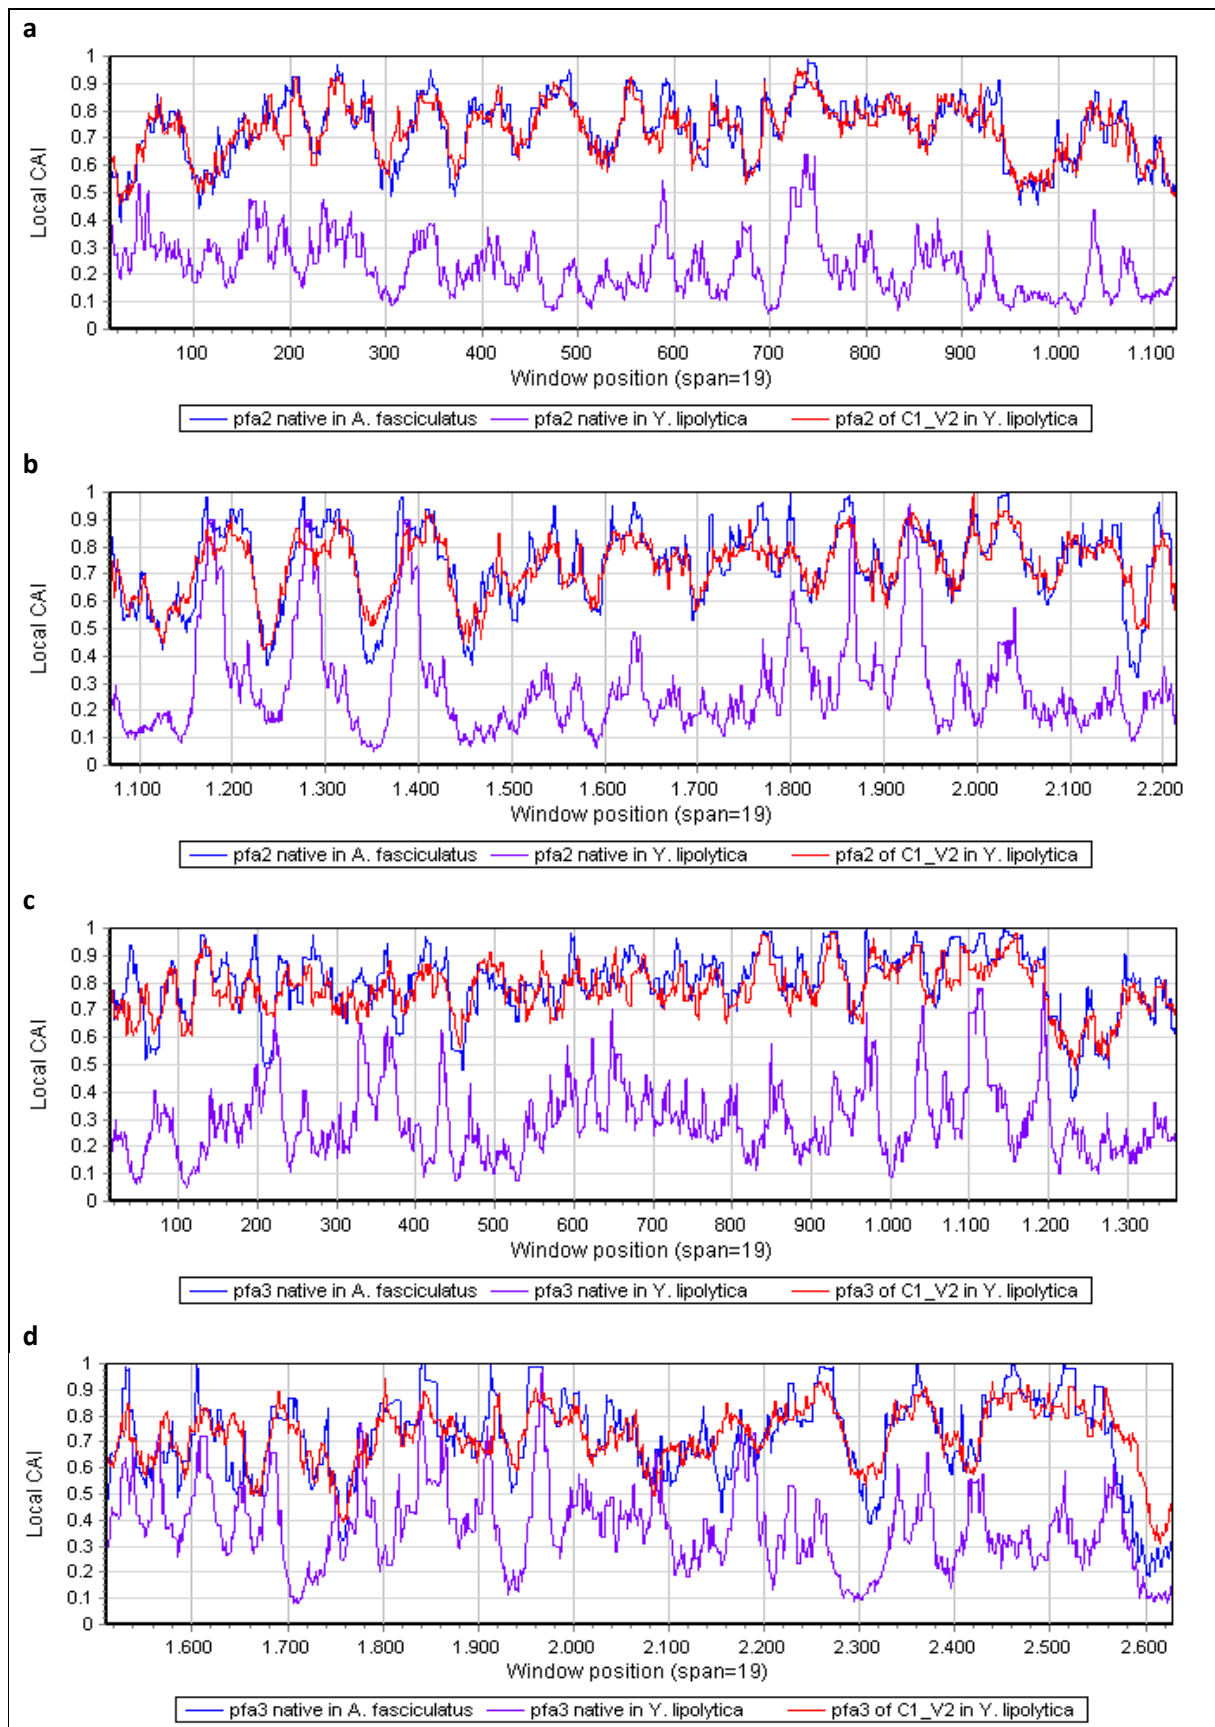

**Supplementary Figure 17: Detailed course of the local codon adaptation index (CAI) of genes *pfa2* and *pfa3* from the native *pfa* biosynthetic gene cluster in *Aerobacter fasciculatus* (SBSr002) (blue), from the artificial *pfa* biosynthetic gene cluster C1\_V2 in *Yarrowia lipolytica* (red) and from the native *pfa* biosynthetic gene cluster in *Y. lipolytica* (violet) in detail. Window width is 19 codons. a) *pfa2* 5'. b) *pfa2* 3'. c) *pfa3* 5'. d) *pfa3* 3'.**

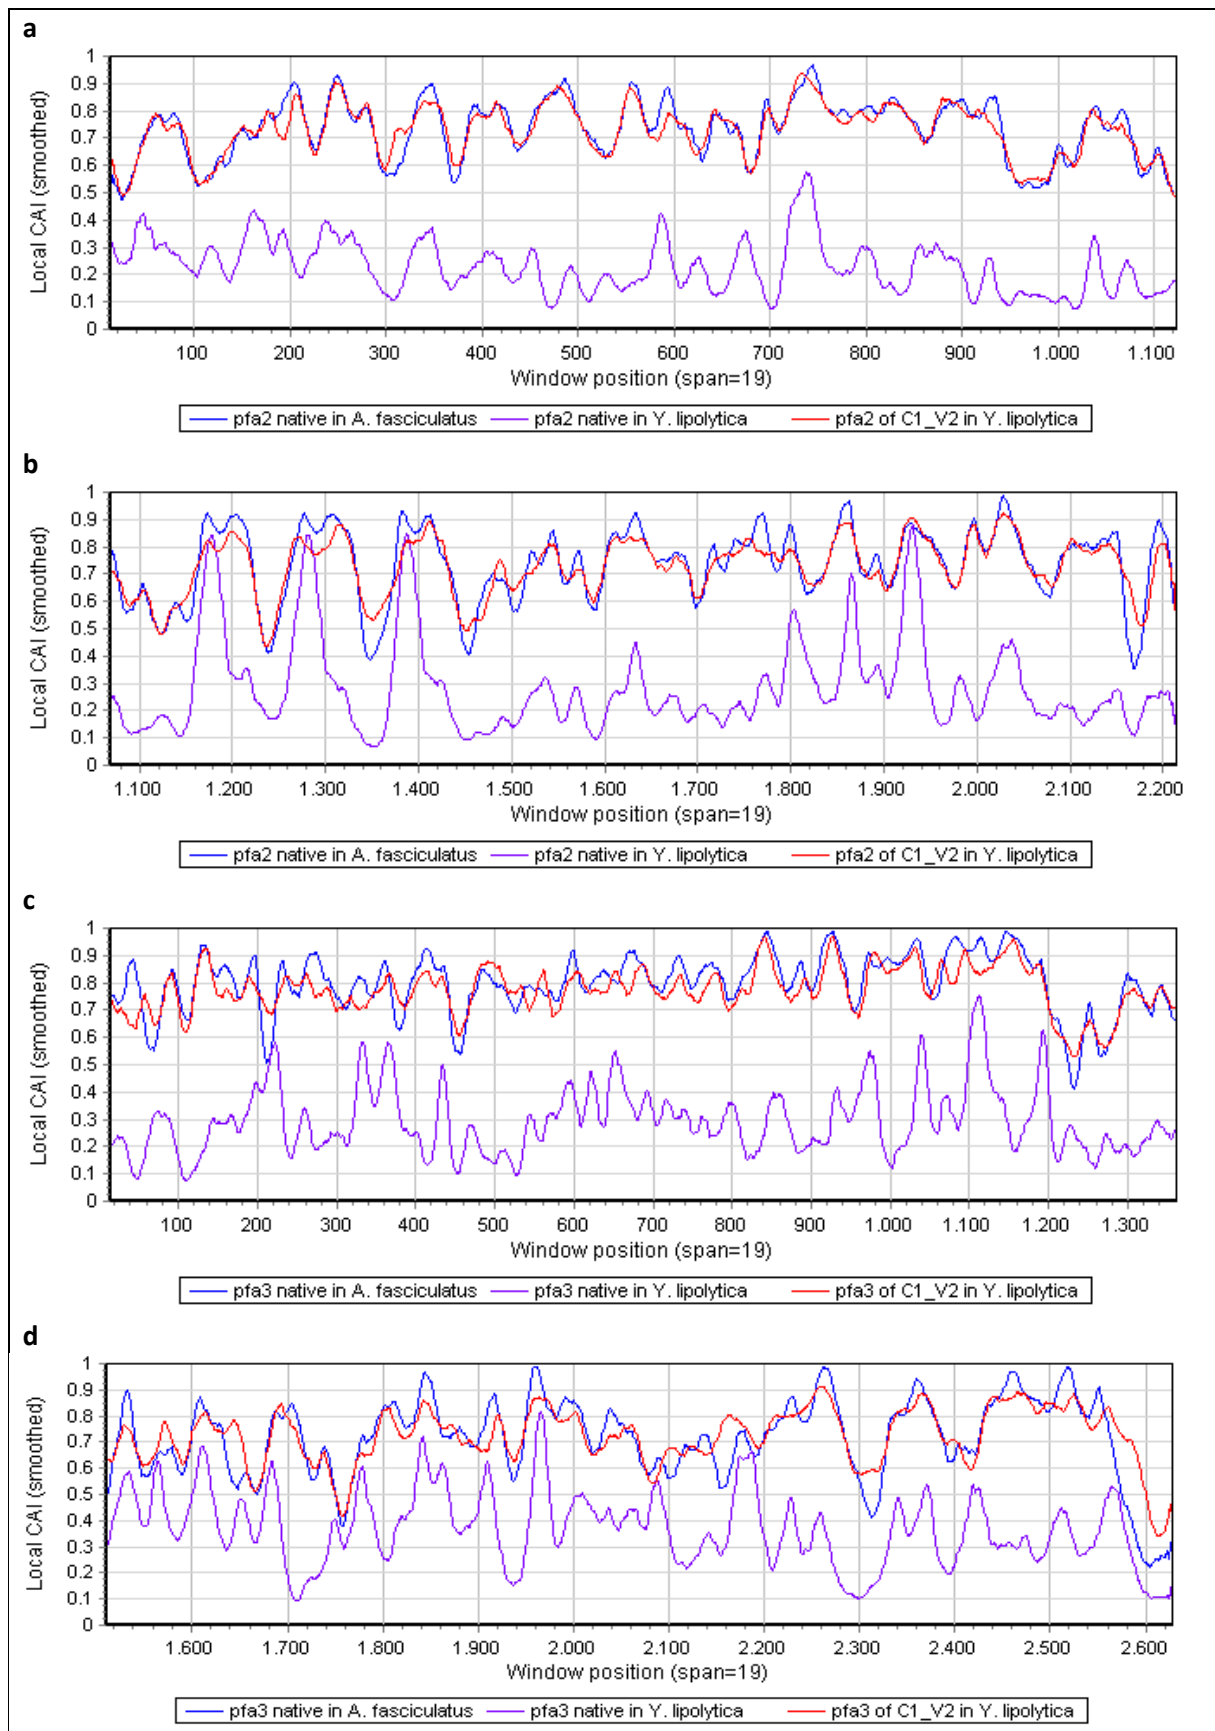

**Supplementary Figure 18: Detailed and smoothed course of the local codon adaptation index (CAI) of genes *pfa2* and *pfa3* from the native *pfa* biosynthetic gene cluster in *Aetherobacter fasciculatus* (SBSr002) (blue), from the artificial *pfa* gene cluster C1\_V2 in *Yarrowia lipolytica* (red) and from the native *pfa* biosynthetic gene cluster in *Y. lipolytica* (violet) in detail. Window width is 19 codons. A) *pfa2*\_5'. B) *pfa2*\_3'. C) *pfa3*\_5'. D) *pfa3*\_3'.**



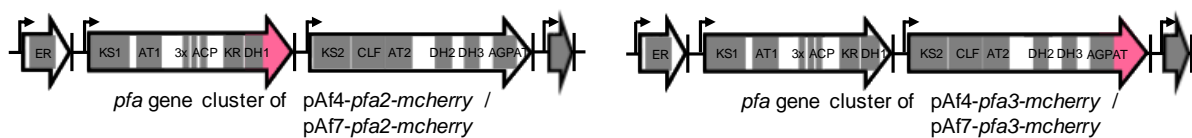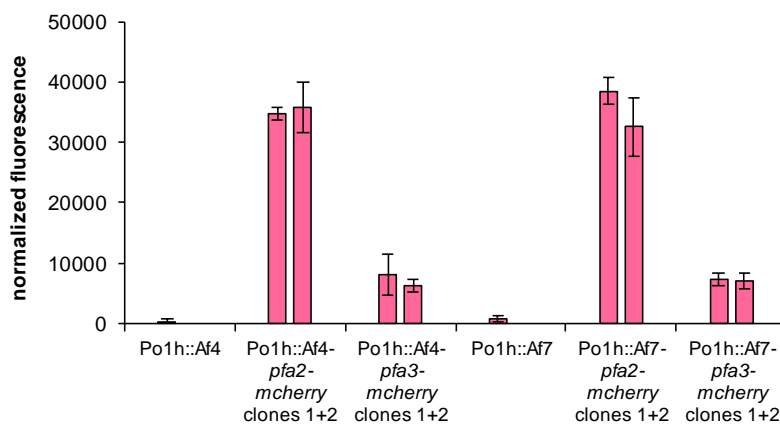

**Supplementary Figure 19: mCherry fluorescence signals received from *Yarrowia lipolytica* Po1h::Af4, *Y. lipolytica* Po1h::Af4-*pfa2*-mcherry, *Y. lipolytica* Po1h::Af4-*pfa3*-mcherry, *Y. lipolytica* Po1h::Af7, *Y. lipolytica* Po1h::Af7-*pfa2*-mcherry, and *Y. lipolytica* Po1h::Af7-*pfa3*-mcherry.** Cultivations were carried out in 10 mL YNBG medium + 50 mM potassium phosphate buffer pH 6.8 at 28 °C and 200 rpm for 168 h. The indicated values are means and standard deviations of three biological replicates. Source data are provided as a Source Data file.

## Supplementary Tables

**Supplementary Table 1: Modified and subsequently normalized codon usage table of *Yarrowia lipolytica* CLIB122 generated for the design of the artificial *pfa* gene clusters C1\_V1 and C3.** Codon counts (n) were obtained from the 6448 protein coding sequences without any length restrictions or offsets. Applying a 20 % threshold to the synonymous codon fractions (f) excluded 23 codons (shaded) and resulted in a subset of 39 sense codons. The synonymous codon fractions were recalculated without the excluded codons (fn). Relative adaptiveness values (w) obtained directly from the given codon counts were used for CAI calculations<sup>4</sup>. Orange and blue marks depict codons that are maximally enriched and depleted, respectively, in a subset of predominantly ribosomal genes.

| AA      | Cod. | n      | f    | fn   | w     | AA      | Cod.    | n      | f    | fn   | w     |
|---------|------|--------|------|------|-------|---------|---------|--------|------|------|-------|
| A (Ala) | GCC  | 102886 | 0.42 | 0.56 | 1     | P (Pro) | CCC     | 73374  | 0.43 | 0.57 | 1     |
|         | GCT  | 80207  | 0.33 | 0.44 | 0.78  |         | CCT     | 54675  | 0.32 | 0.43 | 0.745 |
|         | GCA  | 35003  | 0.14 | 0    | 0.34  |         | CCA     | 21406  | 0.13 | 0    | 0.292 |
|         | GCG  | 27809  | 0.11 | 0    | 0.27  |         | CCG     | 21193  | 0.12 | 0    | 0.289 |
| C (Cys) | TGC  | 19135  | 0.5  | 0.5  | 1     | Q (Gln) | CAG     | 101203 | 0.77 | 0.77 | 1     |
|         | TGT  | 18927  | 0.5  | 0.5  | 0.989 |         | CAA     | 30504  | 0.23 | 0.23 | 0.301 |
| D (Asp) | GAC  | 120546 | 0.64 | 0.64 | 1     | R (Arg) | CGA     | 68655  | 0.43 | 1    | 1     |
|         | GAT  | 67689  | 0.36 | 0.36 | 0.562 |         | AGA     | 26131  | 0.16 | 0    | 0.381 |
| E (Glu) | GAG  | 145918 | 0.71 | 0.71 | 1     |         | CGG     | 24146  | 0.15 | 0    | 0.352 |
|         | GAA  | 58861  | 0.29 | 0.29 | 0.403 |         | CGT     | 18905  | 0.12 | 0    | 0.275 |
| F (Phe) | TTC  | 72145  | 0.59 | 0.59 | 1     |         | CGC     | 13697  | 0.09 | 0    | 0.2   |
|         | TTT  | 49765  | 0.41 | 0.41 | 0.69  |         | AGG     | 7530   | 0.05 | 0    | 0.11  |
| G (Gly) | GGC  | 68568  | 0.34 | 0.37 | 1     | S (Ser) | TCT     | 68721  | 0.27 | 0.51 | 1     |
|         | GGA  | 65478  | 0.33 | 0.35 | 0.955 |         | TCC     | 64991  | 0.25 | 0.49 | 0.946 |
|         | GGT  | 52656  | 0.26 | 0.28 | 0.768 |         | TCG     | 48366  | 0.19 | 0    | 0.704 |
|         | GGG  | 13530  | 0.07 | 0    | 0.197 |         | AGC     | 30946  | 0.12 | 0    | 0.45  |
| H (His) | CAC  | 45371  | 0.6  | 0.6  | 1     |         | TCA     | 24354  | 0.09 | 0    | 0.354 |
|         | CAT  | 29923  | 0.4  | 0.4  | 0.66  |         | AGT     | 21294  | 0.08 | 0    | 0.31  |
| I (Ile) | ATC  | 76798  | 0.5  | 0.52 | 1     | T (Thr) | ACC     | 80954  | 0.42 | 0.61 | 1     |
|         | ATT  | 70891  | 0.46 | 0.48 | 0.923 |         | ACT     | 51514  | 0.27 | 0.39 | 0.636 |
|         | ATA  | 6669   | 0.04 | 0    | 0.087 |         | ACA     | 33004  | 0.17 | 0    | 0.408 |
| K (Lys) | AAG  | 146319 | 0.79 | 0.79 | 1     |         | ACG     | 26632  | 0.14 | 0    | 0.329 |
|         | AAA  | 38829  | 0.21 | 0.21 | 0.265 | V (Val) | GTG     | 80750  | 0.38 | 0.41 | 1     |
| L (Leu) | CTG  | 105552 | 0.39 | 0.6  | 1     |         | GTC     | 67973  | 0.32 | 0.34 | 0.842 |
|         | CTC  | 71148  | 0.26 | 0.4  | 0.674 |         | GTT     | 49958  | 0.24 | 0.25 | 0.619 |
|         | CTT  | 41622  | 0.15 | 0    | 0.394 |         | GTA     | 12560  | 0.06 | 0    | 0.156 |
|         | TTG  | 32687  | 0.12 | 0    | 0.31  | W (Trp) | TGG     | 37691  | 1    | 1    | 1     |
|         | CTA  | 16533  | 0.06 | 0    | 0.157 |         | TAC     | 72803  | 0.77 | 0.77 | 1     |
|         | TTA  | 5531   | 0.02 | 0    | 0.052 | Y (Tyr) | TAT     | 21264  | 0.23 | 0.23 | 0.292 |
| M (Met) | ATG  | 71032  | 1    | 1    | 1     |         | * (Ter) | TAA    | 2716 | 0.42 | -     |
| N (Asn) | AAC  | 98745  | 0.78 | 0.78 | 1     | TAG     |         | 2504   | 0.39 | -    | -     |
|         | AAT  | 27870  | 0.22 | 0.22 | 0.282 | TGA     |         | 1228   | 0.19 | -    | -     |

**Supplementary Table 2: Local opening energies for various control positions within the translation initiation sites of the three *pfa* genes and gene *ppt* of the artificial *pfa* gene clusters C3 and C3\_mod 5'.**  $\Delta G$  values are given in kcal/mol. The calculations related to RNA secondary structures were performed with algorithms from the ViennaRNA Package 2.0<sup>10</sup>. The translation initiation site (TIS) reaches from the first putative transcription start site 47 nt upstream of the ATG start codon down to nucleotide position +53 within the 5' region of the CDS. Using this definition, a region of 100 nt is covered. Five control positions Cap<sub>15</sub>, UTR<sub>51</sub>, ATG<sub>15</sub>, ATG<sub>51</sub>, and CDS<sub>51</sub>, were defined to characterize the TIS. The subscripts denote the length of the stretch for which the opening energies were calculated. Positions were fixed according to Supplementary Figs. 4 and 5 (-40, -22, -1, +1, and +26) with the first nucleotide of the start codon at +1. The first control position Cap<sub>15</sub> (-40) was calculated as the arithmetic mean of the assumed transcription start positions. In this way, the considered stretch for Cap<sub>15</sub> covers all putative TSSs. Control position UTR<sub>51</sub> at -22 is the first possible 51 nt-stretch according to the used definition of the TIS and reaches 4 nt into the 5' region of the CDS. Control position CDS<sub>51</sub> is the center of the first 51 nt-stretch within the CDS. Calculations were performed for two different maximal allowed base pair spans leading to 10 data points per TIS considered. First with the default settings<sup>10</sup> (maximal base pair span and window size: 70 nt) and second with the same parameters set to 100 nt each. With the latter setting, all bases of the 5' region of the CDS (which were modified by silent mutations) were allowed to engage in bindings with all of the nucleotides of the 5'-UTR. Values that are formally higher for C3\_mod 5' than for cluster C3 are underlined.

| Gene                  | $\Delta G_{\text{open}}$ [kcal/mol] |                   |                   |                   |                   |                   |                   |                   |                   |                   |
|-----------------------|-------------------------------------|-------------------|-------------------|-------------------|-------------------|-------------------|-------------------|-------------------|-------------------|-------------------|
|                       | Win=70 / Bps=70                     |                   |                   |                   |                   | Win=100 / Bps=100 |                   |                   |                   |                   |
|                       | Cap <sub>15</sub>                   | ATG <sub>15</sub> | UTR <sub>51</sub> | ATG <sub>51</sub> | CDS <sub>51</sub> | Cap <sub>15</sub> | ATG <sub>15</sub> | UTR <sub>51</sub> | ATG <sub>51</sub> | CDS <sub>51</sub> |
| <i>pfa1</i> C3        | 0.1                                 | 0.8               | 0.4               | 3.3               | 12.5              | 0.0               | 0.5               | 0.5               | 7.3               | 12.6              |
| <i>pfa1</i> C3_mod 5' | 0.1                                 | <u>0.9</u>        | <u>0.5</u>        | 2.1               | 7.2               | <u>0.1</u>        | <u>1.0</u>        | <u>1.0</u>        | 2.7               | 7.5               |
| <i>pfa2</i> C3        | 0.0                                 | 1.7               | 0.7               | 2.2               | 10.0              | 0.0               | 2.9               | 5.5               | 4.2               | 10.4              |
| <i>pfa2</i> C3_mod 5' | 0.0                                 | 1.0               | 0.3               | 1.5               | 6.8               | <u>0.1</u>        | 1.1               | 1.8               | 2.3               | 7.0               |
| <i>pfa3</i> C3        | 0.0                                 | 3.7               | 3.6               | 5.4               | 15.0              | 2.1               | 5.4               | 9.1               | 10.0              | 18.3              |
| <i>pfa3</i> C3_mod 5' | 0.0                                 | 1.7               | 1.8               | 3.2               | 9.5               | 0.9               | 2.6               | 3.2               | 5.7               | 11.5              |
| <i>ppt</i> C3         | 0.1                                 | 2.7               | 1.9               | 5.3               | 9.8               | 0.4               | 1.9               | 1.7               | 6.4               | 10.5              |
| <i>ppt</i> C3_mod 5'  | 0.0                                 | 2.0               | 0.9               | 3.9               | 7.7               | 0.1               | 1.9               | 1.4               | 6.0               | 8.0               |

**Supplementary Table 3: Percent reduction in local opening energies for various control positions within the translation initiation sites of the three *pfa* genes and gene *ppt* of the artificial *pfa* gene cluster C3\_mod 5'.** Values up to 1 kcal/mol in the original data are considered too low for comparison. For explanation of the nomenclature see Supplementary Table 2.

| Gene        | Reduction in $\Delta G_{\text{open}}$ from C3 to C3_mod 5' |                   |                   |                   |                   |                   |                   |                   |                   |                   |
|-------------|------------------------------------------------------------|-------------------|-------------------|-------------------|-------------------|-------------------|-------------------|-------------------|-------------------|-------------------|
|             | Win=70 / Bps=70                                            |                   |                   |                   |                   | Win=100 / Bps=100 |                   |                   |                   |                   |
|             | Cap <sub>15</sub>                                          | ATG <sub>15</sub> | UTR <sub>51</sub> | ATG <sub>51</sub> | CDS <sub>51</sub> | Cap <sub>15</sub> | ATG <sub>15</sub> | UTR <sub>51</sub> | ATG <sub>51</sub> | CDS <sub>51</sub> |
| <i>pfa1</i> | -                                                          | -                 | -                 | -36%              | -42%              | -                 | -                 | -                 | -63%              | -40%              |
| <i>pfa2</i> | -                                                          | -41%              | -                 | -32%              | -32%              | -                 | -62%              | -67%              | -45%              | -33%              |
| <i>pfa3</i> | -                                                          | -54%              | -50%              | -41%              | -37%              | -57%              | -52%              | -65%              | -43%              | -37%              |
| <i>ppt</i>  | -                                                          | -26%              | -53%              | -26%              | -21%              | -                 | 0%                | -18%              | -6%               | -24%              |

**Supplementary Table 4: Local opening energies for various control positions within the translation initiation sites of the three *pfa* genes and gene *ppt* of the artificial *pfa* gene clusters C1\_V1 and C1\_V2.  $\Delta G$  values are given in kcal/mol. For explanation of the nomenclature see Supplementary Table 2.**

| Gene              | $\Delta G_{\text{open}}$ [kcal/mol] |                   |                   |                   |                   |                      |                   |                   |                   |                   |
|-------------------|-------------------------------------|-------------------|-------------------|-------------------|-------------------|----------------------|-------------------|-------------------|-------------------|-------------------|
|                   | Window=70 / Bps=70                  |                   |                   |                   |                   | Window=100 / Bps=100 |                   |                   |                   |                   |
|                   | Cap <sub>15</sub>                   | ATG <sub>15</sub> | UTR <sub>51</sub> | ATG <sub>51</sub> | CDS <sub>51</sub> | Cap <sub>15</sub>    | ATG <sub>15</sub> | UTR <sub>51</sub> | ATG <sub>51</sub> | CDS <sub>51</sub> |
| <i>pfa1</i> C1_V1 | 0.1                                 | 3.8               | 4.2               | 7.6               | 18.5              | 0.1                  | 3.2               | 2.8               | 12.5              | 18.7              |
| <i>pfa1</i> C1_V2 | 0.4                                 | 3.9               | 6.5               | 8.5               | 12.2              | 0.6                  | 3.9               | 3.5               | 8.6               | 13.1              |
| <i>pfa2</i> C1_V1 | 0.0                                 | 2.4               | 2.6               | 5.2               | 10.8              | 0.2                  | 1.6               | 2.5               | 5.6               | 11.3              |
| <i>pfa2</i> C1_V2 | 0.0                                 | 1.3               | 2.0               | 4.9               | 11.1              | 1.0                  | 1.4               | 3.3               | 6.6               | 12.4              |
| <i>pfa3</i> C1_V1 | 0.0                                 | 1.2               | 1.2               | 2.2               | 6.4               | 1.6                  | 1.8               | 2.6               | 4.8               | 8.5               |
| <i>pfa3</i> C1_V2 | 0.0                                 | 1.5               | 2.3               | 5.6               | 10.2              | 0.7                  | 1.8               | 1.9               | 7.4               | 11.8              |
| <i>ppt</i> C1_V1  | 0.1                                 | 2.8               | 3.4               | 8.1               | 11.2              | 0.1                  | 3.3               | 3.2               | 8.7               | 11.5              |
| <i>ppt</i> C1_V2  | 0.0                                 | 2.2               | 1.5               | 6.3               | 6.3               | 0.2                  | 2.5               | 2.7               | 8.4               | 10.0              |

**Supplementary Table 5: Average and minimum ensemble free energy (EFE) values calculated from all 41 nt-sized sliding windows of the CDSs of genes *pfa1*, *pfa2*, *pfa3*, and *ppt* from the native *pfa* biosynthetic gene cluster and from the artificial *pfa* biosynthetic gene clusters C1\_V1 and C1\_V2.  $\Delta G$  values are given in kcal/mol. The 5'-UTR was not included in the calculations.**

| Gene               | $\Delta G_{\text{EFE}_41}$ [kcal/mol] |                         |
|--------------------|---------------------------------------|-------------------------|
|                    | $\Delta G_{\text{mean}}$              | $\Delta G_{\text{min}}$ |
| <i>pfa1</i> native | -15.8                                 | -28.5                   |
| <i>pfa1</i> C1_V1  | -10.1                                 | -20.6                   |
| <i>pfa1</i> C1_V2  | -10.2                                 | -14.9                   |
| <i>pfa2</i> native | -16.1                                 | -31.3                   |
| <i>pfa2</i> C1_V1  | -9.9                                  | -21.1                   |
| <i>pfa2</i> C1_V2  | -10.0                                 | -19.0                   |
| <i>pfa3</i> native | -14.3                                 | -29.6                   |
| <i>pfa3</i> C1_V1  | -9.6                                  | -23.8                   |
| <i>pfa3</i> C1_V2  | -9.7                                  | -17.4                   |
| <i>ppt</i> native  | -13.3                                 | -25.6                   |
| <i>ppt</i> C1_V1   | -8.3                                  | -18.3                   |
| <i>ppt</i> C1_V2   | -8.4                                  | -15.0                   |

**Supplementary Table 6: Codon adaptation indices and tAlaa values of the protein coding sequences of genes *pfa1*, *pfa2*, *pfa3*, and *ppt* from the native *pfa* biosynthetic gene cluster and from the artificial biosynthetic gene clusters C1\_V1 and C1\_V2.** CAI calculations are based on the relative adaptiveness weights from Supplementary Table 1 (CAI<sub>G</sub>), Supplementary Table 14 (CAI<sub>A</sub>), and Supplementary Table 15 (CAI<sub>R</sub>). Calculations were performed according to the standard CAI definition<sup>4</sup> omitting Met and Trp. tAlaa calculations are based on the gene copy numbers (GCN) given in Supplementary Table 15.

| Gene               | CAI <sub>G</sub> | CAI <sub>A</sub> | CAI <sub>R</sub> | tAlaa |
|--------------------|------------------|------------------|------------------|-------|
| <i>pfa1</i> native | 0.628            | 0.367            | 0.227            | 0.429 |
| <i>pfa1</i> C1_V1  | 0.862            | 0.776            | 0.651            | 0.706 |
| <i>pfa1</i> C1_V2  | 0.867            | 0.802            | 0.695            | 0.721 |
| <i>pfa2</i> native | 0.618            | 0.357            | 0.224            | 0.411 |
| <i>pfa2</i> C1_V1  | 0.856            | 0.762            | 0.637            | 0.692 |
| <i>pfa2</i> C1_V2  | 0.870            | 0.815            | 0.720            | 0.732 |
| <i>pfa3</i> native | 0.661            | 0.413            | 0.291            | 0.485 |
| <i>pfa3</i> C1_V1  | 0.859            | 0.766            | 0.640            | 0.702 |
| <i>pfa3</i> C1_V2  | 0.880            | 0.830            | 0.740            | 0.749 |
| <i>ppt</i> native  | 0.636            | 0.365            | 0.259            | 0.432 |
| <i>ppt</i> C1_V1   | 0.852            | 0.760            | 0.650            | 0.729 |
| <i>ppt</i> C1_V2   | 0.860            | 0.803            | 0.732            | 0.74  |

**Supplementary Table 7: Sequence features of the translation initiation site (TIS) and the protein coding sequences (CDS) of genes *pfa1*, *pfa2*, *pfa3*, and *ppt* from the artificial *pfa* biosynthetic gene clusters C1\_V1 and C1\_V2.** TIS features consisting of the arithmetic means of the values for Cap<sub>15</sub>, UTR<sub>51</sub>, ATG<sub>15</sub>, ATG<sub>51</sub>, and CDS<sub>51</sub>, calculated for the two different base pair spans from Supplementary Table 4 and CDS features comprising  $\Delta G_{\text{mean}}$  and  $\Delta G_{\text{min}}$  from Supplementary Table 5 as well as CAI<sub>G</sub>, CAI<sub>A</sub>, CAI<sub>R</sub>, and tAlaa from Supplementary Table 6 are given. For explanation of the nomenclature see Supplementary Table 2, 5, and 6.

| Gene              | TIS - Features    |                   |                   |                   |                   | CDS - Features           |                         |                  |                  |                  |       |                      |
|-------------------|-------------------|-------------------|-------------------|-------------------|-------------------|--------------------------|-------------------------|------------------|------------------|------------------|-------|----------------------|
|                   | Cap <sub>15</sub> | ATG <sub>15</sub> | UTR <sub>51</sub> | ATG <sub>51</sub> | CDS <sub>51</sub> | $\Delta G_{\text{mean}}$ | $\Delta G_{\text{min}}$ | CAI <sub>G</sub> | CAI <sub>A</sub> | CAI <sub>R</sub> | tAlaa | tAlaa <sub>min</sub> |
| <i>pfa1</i> C1_V1 | 0.1               | 3.5               | 3.5               | 10.1              | 18.6              | -10.1                    | -20.6                   | 0.862            | 0.776            | 0.651            | 0.706 | 0.513                |
| <i>pfa1</i> C1_V2 | 0.5               | 3.9               | 5.0               | 8.6               | 12.6              | -10.2                    | -14.9                   | 0.867            | 0.802            | 0.695            | 0.721 | 0.426                |
| <i>pfa2</i> C1_V1 | 0.1               | 2.0               | 2.5               | 5.4               | 11.1              | -9.9                     | -21.1                   | 0.856            | 0.762            | 0.637            | 0.692 | 0.516                |
| <i>pfa2</i> C1_V2 | 0.5               | 1.4               | 2.6               | 5.7               | 11.7              | -10.0                    | -19.0                   | 0.870            | 0.815            | 0.720            | 0.732 | 0.496                |
| <i>pfa3</i> C1_V1 | 0.8               | 1.5               | 1.9               | 3.5               | 7.4               | -9.6                     | -23.8                   | 0.859            | 0.766            | 0.640            | 0.702 | 0.540                |
| <i>pfa3</i> C1_V2 | 0.3               | 1.6               | 2.1               | 6.5               | 11                | -9.7                     | -17.4                   | 0.880            | 0.830            | 0.740            | 0.749 | 0.352                |
| <i>ppt</i> C1_V1  | 0.1               | 3.0               | 3.3               | 8.4               | 11.3              | -8.3                     | -18.3                   | 0.852            | 0.760            | 0.650            | 0.729 | 0.580                |
| <i>ppt</i> C1_V2  | 0.1               | 2.3               | 2.1               | 7.3               | 8.1               | -8.4                     | -15.0                   | 0.860            | 0.803            | 0.732            | 0.74  | 0.460                |

**Supplementary Table 8: Differences in TIS and CDS features between the artificial *pfa* gene clusters C1\_V1 and C1\_V2.** Relative difference is defined as the raw value obtained for C1\_V2 subtracted by the raw value obtained for C1\_V1 subsequently divided by the arithmetic mean. Lower opening energies are considered better than the higher ones. Therefore, relative difference in quality (concerning overall translation efficiency) for the selected sequence features is shown. Raw opening energies lower than 1 kcal/mol were omitted from the calculation.

| Gene        | Relative improvement from C1_V1 to C1_V2 [%] |                   |                   |                   |                   |                          |                         |                  |                  |                  |       |                      |
|-------------|----------------------------------------------|-------------------|-------------------|-------------------|-------------------|--------------------------|-------------------------|------------------|------------------|------------------|-------|----------------------|
|             | TIS - Features                               |                   |                   |                   |                   | CDS - Features           |                         |                  |                  |                  |       |                      |
|             | Cap <sub>15</sub>                            | ATG <sub>15</sub> | UTR <sub>51</sub> | ATG <sub>51</sub> | CDS <sub>51</sub> | $\Delta G_{\text{mean}}$ | $\Delta G_{\text{min}}$ | CAI <sub>G</sub> | CAI <sub>A</sub> | CAI <sub>R</sub> | tAlaa | tAlaa <sub>min</sub> |
| <i>pfa1</i> | -                                            | -11%              | -35%              | 16%               | 38%               | -1%                      | 32%                     | 1%               | 3%               | 7%               | 2%    | -19%                 |
| <i>pfa2</i> | -                                            | 35%               | -4%               | -5%               | -5%               | -1%                      | 10%                     | 2%               | 7%               | 12%              | 6%    | -4%                  |
| <i>pfa3</i> | -                                            | -6%               | -10%              | -60%              | -39%              | -1%                      | 31%                     | 2%               | 8%               | 14%              | 6%    | -42%                 |
| <i>ppt</i>  | -                                            | 26%               | 44%               | 14%               | 33%               | -1%                      | 20%                     | 1%               | 6%               | 12%              | 2%    | -23%                 |

**Supplementary Table 9. LC-PUFAs produced by *Yarrowia lipolytica* Po1h using myxobacterial PUFA synthases.** Cultivation was carried out in 10 mL YNBG medium + 50 mM potassium phosphate buffer pH 6.8 at 28 °C and 200 rpm for 168 h. The indicated values are means and (standard deviations) of three biological replicates. EDA, eicosadienoic acid; ETrA, eicosatrienoic acid; AA, arachidonic acid; DTrA, docosatrienoic acid; DTA, docosatetraenoic acid; DPA, docosapentaenoic acid; DHA, docosahexaenoic acid; TTrA, tetracosatrienoic acid; TTA, tetracosatetraenoic acid. Source data are provided as a Source Data file.

| LC-PUFA                    | Relative amount<br>[% of total fatty acids] |            | Absolute amount<br>[mg g <sup>-1</sup> cell dry weight] |            | Yield<br>[mg L <sup>-1</sup> ] |            |
|----------------------------|---------------------------------------------|------------|---------------------------------------------------------|------------|--------------------------------|------------|
|                            | Po1h::Af4                                   | Po1h::Af7  | Po1h::Af4                                               | Po1h::Af7  | Po1h::Af4                      | Po1h::Af7  |
| <i>n</i> -6 DPA<br>(22:5)  | 0.3 (0.0)                                   | 0.3 (0.0)  | 0.3 (0.0)                                               | 0.3 (0.0)  | 2.1 (0.2)                      | 2.2 (0.2)  |
| <i>n</i> -3 DPA<br>(22:5)  | 0.1 (0.0)                                   | 0.0 (0.0)  | 0.1 (0.0)                                               | 0.1 (0.0)  | 0.4 (0.2)                      | 0.4 (0.2)  |
| DHA<br>(22:6, <i>n</i> -3) | 10.5 (1.0)                                  | 10.6 (0.3) | 12.8 (0.4)                                              | 12.2 (0.8) | 86.1 (3.6)                     | 88.7 (1.6) |
|                            | Po1h::Mr1                                   | Po1h::Mr2  | Po1h::Mr1                                               | Po1h::Mr2  | Po1h::Mr1                      | Po1h::Mr2  |
| <i>n</i> -7 EDA<br>(20:2)  | 0.0 (0.0)                                   | 0.0 (0.0)  | 0.0 (0.0)                                               | 0.0 (0.0)  | 0.1 (0.1)                      | 0.1 (0.0)  |
| <i>n</i> -9 ETrA<br>(20:3) | 0.3 (0.0)                                   | 0.3 (0.0)  | 0.3 (0.0)                                               | 0.2 (0.0)  | 1.9 (0.3)                      | 1.8 (0.0)  |
| <i>n</i> -7 ETrA<br>(20:3) | 0.4 (0.0)                                   | 0.3 (0.0)  | 0.4 (0.1)                                               | 0.3 (0.0)  | 3.0 (0.4)                      | 2.0 (0.0)  |
| <i>n</i> -6 ETrA<br>(20:3) | 0.0 (0.0)                                   | 0.0 (0.0)  | 0.0 (0.0)                                               | 0.0 (0.0)  | 0.0 (0.0)                      | 0.3 (0.3)  |
| <i>n</i> -3 ETrA<br>(20:3) | 0.1 (0.0)                                   | 0.1 (0.0)  | 0.1 (0.0)                                               | 0.1 (0.0)  | 0.4 (0.2)                      | 0.5 (0.0)  |
| AA<br>(20:4, <i>n</i> -6)  | 1.0 (0.1)                                   | 1.7 (0.0)  | 1.2 (0.1)                                               | 1.5 (0.0)  | 8.0 (0.9)                      | 10.9 (0.5) |
| <i>n</i> -9 DTrA<br>(22:3) | 0.1 (0.0)                                   | 0.1 (0.1)  | 0.1 (0.0)                                               | 0.1 (0.1)  | 0.4 (0.1)                      | 0.4 (0.6)  |
| <i>n</i> -7 DTrA<br>(22:3) | 0.5 (0.1)                                   | 0.7 (0.0)  | 0.6 (0.2)                                               | 0.6 (0.0)  | 3.9 (1.1)                      | 4.7 (0.1)  |
| <i>n</i> -6 DTA<br>(22:4)  | 1.3 (0.1)                                   | 1.9 (0.1)  | 1.4 (0.3)                                               | 1.7 (0.1)  | 9.9 (1.4)                      | 12.5 (0.8) |
| <i>n</i> -7 TTrA<br>(24:3) | 0.1 (0.1)                                   | 0.1 (0.1)  | 0.1 (0.1)                                               | 0.1 (0.1)  | 0.4 (0.4)                      | 0.5 (0.6)  |
| <i>n</i> -6 TTA<br>(24:4)  | 0.8 (0.1)                                   | 1.2 (0.0)  | 0.9 (0.1)                                               | 1.1 (0.0)  | 6.1 (0.7)                      | 8.1 (0.4)  |

**Supplementary Table 10: DHA production improvement in *Y. lipolytica* Po1h::Af4 based on an optimization of medium composition.** Shake flask cultivations were carried out in triplicates (n = 3). Performance parameters were determined after 200 h of cultivation. Source data are provided as a Source Data file.

| #  | Condition description                                                                                                                              | Productivity<br>[mg <sub>DHA</sub> L <sup>-1</sup> h <sup>-1</sup> ] | Titer<br>[mg <sub>DHA</sub> L <sup>-1</sup> ] | DHA<br>[% of total FAs] | Y <sub>X/S</sub><br>[g <sub>DCW</sub> C-mole <sup>-1</sup> ] | Y <sub>P/X</sub><br>[mg <sub>DHA</sub> g <sub>DCW</sub> <sup>-1</sup> ] |
|----|----------------------------------------------------------------------------------------------------------------------------------------------------|----------------------------------------------------------------------|-----------------------------------------------|-------------------------|--------------------------------------------------------------|-------------------------------------------------------------------------|
| 0  | Glucose (0.666 C-mole L <sup>-1</sup> , 0.076 N-mole L <sup>-1</sup> , C/N 8.8, 1.7 g L <sup>-1</sup> YNB, 50 mM P buffer)                         | 0.51 ±0.02                                                           | 86.10 ±3.22                                   | 10.54 ±0.98             | 10.12 ±0.46                                                  | 12.78 ±0.32                                                             |
| 1  | Glucose (0.333 C-mole L <sup>-1</sup> , 0.076 N-mole L <sup>-1</sup> , C/N 4.4, 1.7 g L <sup>-1</sup> YNB, 200 mM P buffer)                        | 0.10 ±0.00                                                           | 19.76 ±0.79                                   | 7.11 ±0.36              | 9.89 ±0.35                                                   | 6.67 ±1.51                                                              |
| 2  | Glucose (0.333 C-mole L <sup>-1</sup> , 0.076 N-mole L <sup>-1</sup> , C/N 4.4, 1.7 g L <sup>-1</sup> YNB, 200 mM MES buffer)                      | 0.16 ±0.01                                                           | 38.69 ±1.42                                   | 13.54 ±0.29             | 13.06 ±0.34                                                  | 10.50 ±0.57                                                             |
| 3  | Glucose (0.9 C-mole L <sup>-1</sup> , 0.028 N-mole L <sup>-1</sup> , C/N 35, 0.85 g L <sup>-1</sup> YNB, 200 mM MES buffer)                        | 0.44 ±0.01                                                           | 79.73 ±2.67                                   | 15.15 ±0.52             | 8.81 ±0.17                                                   | 10.20 ±0.19                                                             |
| 4  | Glucose (0.9 C-mole L <sup>-1</sup> , 0.076 N-mole L <sup>-1</sup> , C/N 13, 0.85 g L <sup>-1</sup> YNB, 200 mM MES buffer)                        | <b>0.55 ±0.06</b>                                                    | <b>104.79 ±11.23</b>                          | <b>16.56 ±1.69</b>      | 8.69 ±0.15                                                   | 11.21 ±1.44                                                             |
| 5  | Glucose (0.9 C-mole L <sup>-1</sup> , 0.028 N-mole L <sup>-1</sup> , C/N 35, 0.85 g L <sup>-1</sup> YNB, 200 mM P buffer)                          | 0.08 ±0.01                                                           | 14.30 ±1.81                                   | 4.62 ±0.16              | 10.36 ±0.02                                                  | 1.89 ±0.24                                                              |
| 6  | Glucose (0.9 C-mole L <sup>-1</sup> , 0.028 N-mole L <sup>-1</sup> , C/N 35, 1.7 g L <sup>-1</sup> YNB, 200 mM P buffer)                           | 0.03 ±0.00                                                           | 5.15 ±0.52                                    | 2.33 ±0.13              | 10.21 ±0.07                                                  | 0.60 ±0.07                                                              |
| 7  | Glycerol (0.333 C-mole L <sup>-1</sup> , 0.076 N-mole L <sup>-1</sup> , C/N 4.4, 1.7 g L <sup>-1</sup> YNB, 200 mM P buffer)                       | 0.24 ±0.02                                                           | 47.89 ±4.91                                   | 11.77 ±2.33             | 13.25 ±1.09                                                  | 12.80 ±2.75                                                             |
| 8  | Glycerol (0.333 C-mole L <sup>-1</sup> , 0.076 N-mole L <sup>-1</sup> , C/N 4.4, 1.7 g L <sup>-1</sup> YNB, 200 mM MES buffer)                     | 0.30 ±0.02                                                           | 77.48 ±5.90                                   | 12.11 ±0.24             | 15.65 ±0.04                                                  | 14.55 ±0.91                                                             |
| 9  | Glycerol (0.333 C-mole L <sup>-1</sup> , 0.076 N-mole L <sup>-1</sup> (NH <sub>4</sub> Cl), C/N 4.4, 1.7 g L <sup>-1</sup> YNB, 200 mM MES buffer) | 0.39 ±0.01                                                           | 75.74 ±1.21                                   | 13.35 ±0.35             | 14.48 ±0.19                                                  | 14.53 ±0.63                                                             |
| 10 | Glycerol (0.98 C-mole L <sup>-1</sup> , 0.016 N-mole L <sup>-1</sup> , C/N 60, 0.85 g L <sup>-1</sup> YNB, 200 mM MES buffer)                      | <b>0.53 ±0.03</b>                                                    | <b>112.53 ±5.92</b>                           | 10.56 ±0.50             | 5.75 ±0.08                                                   | <b>18.45 ±0.79</b>                                                      |
| 11 | Glucose+Glycerol (0.333 C-mole L <sup>-1</sup> , 0.076 N-mole L <sup>-1</sup> , C/N 4.4, 1.7 g L <sup>-1</sup> YNB, 200 mM MES buffer)             | 0.23 ±0.00                                                           | 58.85 ±1.49                                   | 14.43 ±2.76             | 14.45 ±0.41                                                  | 13.26 ±0.20                                                             |
| 12 | Acetate (0.6 C-mole L <sup>-1</sup> , 0.076 N-mole L <sup>-1</sup> , C/N 8, 1.7 g L <sup>-1</sup> YNB, 200 mM P buffer)                            | 0.20 ±0.00                                                           | 42.10 ±0.71                                   | <b>16.78 ±0.72</b>      | 6.02 ±0.16                                                   | <b>16.39 ±0.71</b>                                                      |



**Supplementary Table 11: Primers used for cloning of integrative plasmids in this study.** The introduced restriction sites are underlined and the introduced nucleotide exchanges are shown in bold.

| <b>Primer</b>                                 | <b>Sequence (5'→3')</b>                                                                                  |
|-----------------------------------------------|----------------------------------------------------------------------------------------------------------|
| HA+SdaI+cm <sup>R</sup> for pINA1312_fwd      | <u>GAGACTGAAATAAAATTTAGTCTGCAGCCCAAGCTAGCTTATCGATA</u><br><u>CGCGCCTGCAGGATTTAACGACCCTGCCCTGAACCGACG</u> |
| HA+PacI+cm <sup>R</sup> for pINA1292+1312_rev | <u>TACCCTGTCGGATGACTAACTCTCCAGAGCGAGTGTTACACATGGA</u><br><u>ATTCTTAATTAAGTAAGTTGGCAGCATCACCCGACGC</u>    |
| cm <sup>R</sup> _SdaI+PacI+SwaI+SgsI_fwd      | <u>ATGCCTGCAGGTTAATTAATTTAAATGGCGCGCCTGAACCGAC</u><br><u>GACCCGGGTC</u>                                  |
| p15A_SgsI+NotI+SgrDI_rev                      | <u>GCTCGTCGACGTAGCGGCCGCGGGCGGCCGTATGGGGCTGACT</u><br><u>TCAGGTG</u>                                     |
| hph_A_fwd                                     | AATGAAAAAGCCTGAACTCACCGCGACGTC                                                                           |
| hph_BamHI_rev                                 | GTCCTGGATCCCTATTCCTTTGCCCTCGGACGAG                                                                       |
| UAS1B_SdaI_fwd                                | AAGCCTGCAGGTAGCTTATCGATACGCGTGC                                                                          |
| hph+LIP2t overlap_rev                         | GGTAGAAGTTGTAAAGAGTGATAAATAGCCTATTCCTTTGCC<br>TCGGACG                                                    |
| LIP2t+hph overlap_fwd                         | CGTCCGAGGGCAAAGGAATAGGCTATTTATCACTCTTTACAAC<br>TTCTACC                                                   |
| LIP2t_SgrDI_rev                               | ATCCGTCGACGGTTTCGATTTGTCTTAGAGG                                                                          |
| PIS_fragment1_NotI_fwd                        | GCCGCGGCCGCTGGTTACTTTTTGATACACCTG                                                                        |
| PIS_fragment1_PciI+SgrDI_rev                  | AACCGTCGACGACATGTGTCGCAACTTCAAGGAGGACCAAGC<br>TCTGTACACCGAGAAACACCGCTGGAAACGGTGGAAC                      |
| PIS_fragment2_PacI_fwd                        | AGGTTAATTAATTGCGAGTACGACATGGTGG                                                                          |
| PIS_fragment2_SwaI_rev                        | GCCATTTAAATTGTTGAGATATACTTCAGACGCTG                                                                      |
| MCS for pACYC_fwd                             | <u>TTTAAACCTGCAGGGCGGTGCACGCGCCATGGCGCGTCGACCG</u><br><u>CAACGTTGCGCGACG</u>                             |
| MCS for pACYC_rev                             | <u>GGATCCTTAATTAACGCCTAGGGCGCGCCGGCGCGCGACGTCG</u><br><u>CGCAACGTTGCGGTCGACGC</u>                        |
| pfa2_fwd                                      | CGCTGAGCGACGACGTCGAGG                                                                                    |
| pfa2+mcherry overlap_rev                      | CCTCCTCGCCCTTGCTCACCATAGAAGCGGGACCGGTCTCCAC                                                              |
| pfa2+mcherry overlap_rev_2                    | CCTCCTCGCCCTTGCTCACCATCGAGGCGGGGCCAGTTTCAAC<br>C                                                         |
| mcherry+pfa2 overlap_fwd                      | GTGGAGACCGGTCCCGCTTCTATGGTGAGCAAGGGCGAGGAG<br>G                                                          |
| mcherry+pfa2 overlap_fwd_2                    | GGTTGAAACTGGCCCCGCTCGATGGTGAGCAAGGGCGAGGA<br>GG                                                          |
| mcherry+LIP2t overlap_rev                     | GAGGTAGAAGTTGTAAAGAGTGATAAATAGCTCACTTGTACA<br>GCTCGTCCATGCC                                              |
| LIP2t+mcherry overlap_fwd                     | GGCATGGACGAGCTGTACAAGTGAGCTATTTATCACTCTTTAC<br>AACTTCTACCTC                                              |
| linker 2_rev                                  | AACGTTTCGGCGAGAAGCAGGC                                                                                   |
| pfa3_fwd                                      | GAATCTCGGCATGCGAGTCGTGGC                                                                                 |
| pfa3+mcherry overlap_rev                      | CCTCCTCGCCCTTGCTCACCATACCTCCCTCGACGAGCAGGGT<br>G                                                         |
| pfa3+mcherry overlap_rev_2                    | CCTCCTCGCCCTTGCTCACCATTCCACCCTCAACCAGAAGAGT<br>AGC                                                       |
| mcherry+pfa3 overlap_fwd                      | CACCCTGCTCGTCGAGGGAGGTATGGTGAGCAAGGGCGAGGA<br>GG                                                         |

**Continuation of Supplementary Table 11.**

| <b>Primer</b>                     | <b>Sequence (5'→3')</b>                           |
|-----------------------------------|---------------------------------------------------|
| <i>mcherry+pfa3</i> overlap_fwd_2 | GCTACTCTTCTGGTTGAGGGTGAATGGTGAGCAAGGGCGAG<br>GAGG |
| linker 3_rev                      | CATGCAACTCCTAGGACAGGTGCC                          |
| DH1-Mr_ <i>Kj1</i> _fwd           | <u>GGGTCCCTGGGAAGGAGGCATG</u>                     |
| KR-Mr_fwd                         | GTCGACGTGGATGAGGCTGTTGC                           |
| KR-Mr+DH1-Af overlap_rev          | CGAGCTCAATTTTCGTCAGCGGATCCAGAGAGCTCG              |
| DH1-Af+KR-Mr overlap_fwd          | CGAGCTCTCTGGATCCGCTGACGAAATTGAGCTCG               |
| H2270A_fwd_2                      | GAGGGTTCTCTGTGGGTGGACGGCAAAC                      |
| H2270A_CA to GC_rev               | CAGGTGGGTGAGCGTCACCCAGCCAG                        |
| H2270A_CA to GC_fwd               | CTGGCTGGGTGACGCTCGACCCACCTG                       |
| H2270A_rev                        | GCAACTCCTAGGACAGGTGCCGGTTTCG                      |

**Supplementary Table 12: Plasmids constructed in this study.** *oriV*, origin of replication; *hph*, hygromycin resistance gene; *cat*, chloramphenicol resistance gene; *aph(3')-IIa*, kanamycin resistance gene; *URA3*, gene encoding the orotidine 5'-phosphate decarboxylase from *Y. lipolytica*; *hp4d*, hybrid promoter comprising four copies of the distal upstream activating sequence from the *XPR2* promoter in front of a minimal *LEU2* promoter from *Y. lipolytica*; *LIP2t*, terminator of gene *LIP2* encoding an extracellular lipase from *Y. lipolytica*; *XPR2t*, terminator of gene *XPR2* encoding an alkaline extracellular protease from *Y. lipolytica*; *zeta*, long terminal repeats (LTRs) of the retrotransposon *Ylt1* from *Y. lipolytica*.

| Plasmid                                              | Characteristics                                                                                                                                                                                                                                                                                                                                                                                                                                                                                                                                                                                                                                     |
|------------------------------------------------------|-----------------------------------------------------------------------------------------------------------------------------------------------------------------------------------------------------------------------------------------------------------------------------------------------------------------------------------------------------------------------------------------------------------------------------------------------------------------------------------------------------------------------------------------------------------------------------------------------------------------------------------------------------|
| pINA1312- <i>SdaI</i> -cm <sup>R</sup> - <i>PacI</i> | Derivative of pINA1312 <sup>42</sup> in which <i>hp4d</i> and <i>XPR2t</i> were exchanged for <i>cat</i> flanked by <i>SdaI</i> and <i>PacI</i> restriction sites by Red/ET recombineering. pMB1 <i>oriV</i> , <i>aph(3')-IIa</i> , <i>cat</i> , <i>URA3</i> , <i>zeta</i> .                                                                                                                                                                                                                                                                                                                                                                        |
| pINA1312- <i>hph</i>                                 | Derivative of pINA1312 <sup>42</sup> in which <i>hph</i> was inserted via <i>PmII</i> and <i>BamHI</i>                                                                                                                                                                                                                                                                                                                                                                                                                                                                                                                                              |
| pKG1                                                 | p15A <i>oriV</i> and <i>cat</i> of pACYC184 (New England Biolabs) plus <i>hp4d-hph-LIP2t</i> flanked by <i>SgsI-NotI-SgrDI</i> and <i>SdaI-PacI-SwaI-SgsI</i> restriction sites                                                                                                                                                                                                                                                                                                                                                                                                                                                                     |
| pKG1-PIS                                             | Derivative of pKG1 in which 1 kb homology regions upstream and downstream of the preferred integration site were inserted via <i>NotI</i> / <i>SgrDI</i> and <i>PacI</i> / <i>SwaI</i>                                                                                                                                                                                                                                                                                                                                                                                                                                                              |
| pKG2-PIS                                             | Derivative of pKG1-PIS in which <i>hp4d-hph-LIP2t</i> was exchanged for <i>URA3p-URA3-URA3t</i> via <i>PciI</i> and <i>SdaI</i>                                                                                                                                                                                                                                                                                                                                                                                                                                                                                                                     |
| pACYC_assembly                                       | Derivative of pACYC177 (New England Biolabs) in which a multiple cloning site comprising <i>SdaI</i> , <i>ApaLI</i> , <i>NcoI</i> , <i>Sall</i> , <i>AcII</i> , <i>AatII</i> , <i>NgoMIV</i> , <i>AvrII</i> , and <i>PacI</i> restriction sites was inserted via <i>DraI</i> and <i>BamHI</i>                                                                                                                                                                                                                                                                                                                                                       |
| pACYC_BB1-4_C1_V1                                    | Derivative of pACYC_assembly in which building block 1 of the synthetic <i>pfa</i> gene cluster version C1_V1 was inserted via <i>SdaI</i> and <i>ApaLI</i> , in which building block 2 of the synthetic <i>pfa</i> gene cluster version C1_V1 was inserted via <i>ApaLI</i> and <i>AcII</i> , in which building block 3 of the synthetic <i>pfa</i> gene cluster version C1_V1 was inserted via <i>AcII</i> and <i>AvrII</i> , and in which building block 4 of the synthetic <i>pfa</i> gene cluster version C1_V1 was inserted via <i>AvrII</i> and <i>PacI</i>                                                                                  |
| pSynPfaPptAf2 (pAf2)                                 | Derivative of pACYC_BB1-4_C1_V1 in which the vector backbone was exchanged for the vector backbone of pINA1312- <i>SdaI</i> -cm <sup>R</sup> - <i>PacI</i> via <i>SdaI</i> and <i>PacI</i>                                                                                                                                                                                                                                                                                                                                                                                                                                                          |
| pSynPfaPptAf4 (pAf4)                                 | Derivative of pSynPfaPptAf2 in which the vector backbone was exchanged for the vector backbone of pKG2-PIS via <i>SdaI</i> and <i>PacI</i>                                                                                                                                                                                                                                                                                                                                                                                                                                                                                                          |
| pACYC_BB1-3_C3                                       | Derivative of pACYC_assembly in which building block 1 of the synthetic <i>pfa</i> gene cluster version C3 was inserted via <i>SdaI</i> and <i>ApaLI</i> , in which building block 2 of the synthetic <i>pfa</i> gene cluster version C3 was inserted via <i>ApaLI</i> and <i>NcoI</i> , and in which building block 3 of the synthetic <i>pfa</i> gene cluster version C3 was inserted via <i>NcoI</i> and <i>AcII</i>                                                                                                                                                                                                                             |
| pSyn_BB1-6_C3                                        | Derivative of pSynPfaPptAf2 in which building blocks 1+2 were exchanged for building blocks 1-3 of pACYC_BB1-3_C3 via <i>SdaI</i> and <i>AcII</i> , in which the first part of building block 3 was exchanged for building block 4 of the synthetic <i>pfa</i> gene cluster version C3 via <i>AcII</i> and <i>KpnI</i> , in which the last part of building block 3 was exchanged for building block 5 of the synthetic <i>pfa</i> gene cluster version C3 via <i>KpnI</i> and <i>AvrII</i> , and in which building block 4 was exchanged for building block 6 of the synthetic <i>pfa</i> gene cluster version C3 via <i>AvrII</i> and <i>PacI</i> |

Continuation of Supplementary Table 12.

| Plasmid                                | Characteristics                                                                                                                                                                                                                                                                                                                                                                                                                                 |
|----------------------------------------|-------------------------------------------------------------------------------------------------------------------------------------------------------------------------------------------------------------------------------------------------------------------------------------------------------------------------------------------------------------------------------------------------------------------------------------------------|
| pACYC_BB1-6_C3                         | Derivative of pSyn_BB1-6_C3 in which the vector backbone was exchanged for the vector backbone of pACYC_assembly via <i>SdaI</i> and <i>PacI</i>                                                                                                                                                                                                                                                                                                |
| pSynPfaPptMr1 (pMr1)                   | Derivative of pSyn_BB1-6_C3 in which the vector backbone was exchanged for the vector backbone of pKG2-PIS via <i>SdaI</i> and <i>PacI</i>                                                                                                                                                                                                                                                                                                      |
| pACYC_BB1-6_C3_BB1+2+4+6_mod 5'        | Derivative of pACYC_BB1-6_C3 in which building block 1 was exchanged for BB1_C3_mod 5' via <i>SdaI</i> and <i>ApaLI</i> , in which the 5' part of building block 2 was exchanged for BB2_C3_mod 5' via <i>ApaLI</i> and <i>PciI</i> , in which the 5' part of building block 4 was exchanged for BB4_C3_mod 5' via <i>AcII</i> and <i>KpnI</i> , and in which building block 6 was exchanged for BB6_C3_mod 5' via <i>AvrII</i> and <i>PacI</i> |
| pSynPfaPptMr2 (pMr2)                   | Derivative of pACYC_BB1-6_C3_BB1+2+4+6_mod 5' in which the vector backbone was exchanged for the vector backbone of pKG2-PIS via <i>SdaI</i> and <i>PacI</i>                                                                                                                                                                                                                                                                                    |
| pACYC_SynHyb1                          | Derivative of pACYC_BB1-4_C1_V1 in which hp4d, the KS2, the CLF, the AT2, the DH2, and the DH3 domain of synthetic gene <i>pfa3</i> were replaced by the homologous domains of synthetic gene <i>pfa3</i> originating from <i>M. rosea</i> (SBNa008) via <i>AcII</i> and <i>FseI</i>                                                                                                                                                            |
| pSynHybPfaPpt1 (pHyb1)                 | Derivative of pSynHybPfaPpt2 in which the DH2, the DH3, and the AGPAT domain of synthetic gene <i>pfa3</i> were replaced by the homologous domains plus the DH4 domain of synthetic gene <i>pfa3</i> originating from <i>M. rosea</i> (SBNa008) via <i>KpnI</i> and <i>AvrII</i>                                                                                                                                                                |
| pSynHybPfaPpt2 (pHyb2)                 | Derivative of pACYC_SynHyb1 in which the vector backbone was exchanged for the vector backbone of pKG2-PIS via <i>SdaI</i> and <i>PacI</i>                                                                                                                                                                                                                                                                                                      |
| pSynHybPfaPpt2a (pHyb2a)               | Derivative of pSynHybPfaPpt2 in which the AGPAT domain of synthetic gene <i>pfa3</i> was replaced by the DH4 domain of synthetic gene <i>pfa3</i> from <i>M. rosea</i> (SBNa008) plus the AGPAT domain of synthetic gene <i>pfa3</i> originating from <i>A. fasciculatus</i> (SBSr002) via <i>FseI</i> and <i>AvrII</i>                                                                                                                         |
| pSynHybPfaPpt5 (pHyb5)                 | Derivative of pSynPfaPptAf4 in which the DH2 and the DH3 domain of synthetic gene <i>pfa3</i> were replaced by the homologous domains of synthetic gene <i>pfa3</i> originating from <i>M. rosea</i> (SBNa008) via <i>KpnI</i> and <i>FseI</i>                                                                                                                                                                                                  |
| pSynHybPfaPpt5a (pHyb5a)               | Derivative of pSynHybPfaPpt5 in which the AGPAT domain of synthetic gene <i>pfa3</i> was replaced by the DH4 domain of synthetic gene <i>pfa3</i> from <i>M. rosea</i> (SBNa008) plus the AGPAT domain of synthetic gene <i>pfa3</i> originating from <i>A. fasciculatus</i> (SBSr002) via <i>FseI</i> and <i>AvrII</i>                                                                                                                         |
| pSynHybPfaPpt6 (pHyb6)                 | Derivative of pSynPfaPptAf4 in which the AGPAT domain of synthetic gene <i>pfa3</i> was replaced by the DH4 domain plus the AGPAT domain of synthetic gene <i>pfa3</i> from <i>M. rosea</i> (SBNa008) via <i>FseI</i> and <i>AvrII</i>                                                                                                                                                                                                          |
| pSynHybPfaPpt6b (pHyb6b)               | Derivative of pSynPfaPptAf4 in which the AGPAT domain of synthetic gene <i>pfa3</i> was replaced by the DH4 domain of synthetic gene <i>pfa3</i> from <i>M. rosea</i> (SBNa008) plus the AGPAT domain of synthetic gene <i>pfa3</i> originating from <i>A. fasciculatus</i> (SBSr002) via <i>FseI</i> and <i>AvrII</i>                                                                                                                          |
| pSynHybPfaPpt6b-H2270A (pHyb6b-H2270A) | Derivative of pSynHybPfaPpt6b in which the DH4 and the AGPAT domain of synthetic gene <i>pfa3</i> were replaced by the identical domains, but carrying an active site H2270A point mutation within the DH4 domain, via <i>FseI</i> and <i>AvrII</i>                                                                                                                                                                                             |

Continuation of Supplementary Table 12.

| Plasmid                                                                           | Characteristics                                                                                                                                                                                                                                                                                                                                                                                                                                                                                                                                                    |
|-----------------------------------------------------------------------------------|--------------------------------------------------------------------------------------------------------------------------------------------------------------------------------------------------------------------------------------------------------------------------------------------------------------------------------------------------------------------------------------------------------------------------------------------------------------------------------------------------------------------------------------------------------------------|
| pSynHybPfaPpt7 (pHyb7)                                                            | Derivative of pSynPfaPptAf4 in which synthetic genes <i>pfa2</i> and <i>pfa3</i> were replaced by synthetic genes <i>pfa2</i> and <i>pfa3</i> originating from <i>M. rosea</i> (SBNa008) via <i>ApaLI</i> and <i>AvrII</i>                                                                                                                                                                                                                                                                                                                                         |
| pACYC_SynHyb3                                                                     | Derivative of pACYC_BB1-4_C1_V1 in which synthetic gene <i>pfa2</i> was replaced by synthetic gene <i>pfa2</i> originating from <i>M. rosea</i> (SBNa008) via <i>ApaLI</i> and <i>AcII</i>                                                                                                                                                                                                                                                                                                                                                                         |
| pSynHybPfaPpt8 (pHyb8)                                                            | Derivative of pACYC_SynHyb3 in which the vector backbone was exchanged for the vector backbone of pKG2-PIS via <i>SdaI</i> and <i>PacI</i>                                                                                                                                                                                                                                                                                                                                                                                                                         |
| pACYC_SynHyb4                                                                     | Derivative of pACYC_BB1-4_C1_V1 in which the DH1 domain of synthetic gene <i>pfa2</i> was replaced by the PCR product of the homologous domain of synthetic gene <i>pfa2</i> originating from <i>M. rosea</i> (SBNa008) via <i>KfII</i> and <i>AcII</i>                                                                                                                                                                                                                                                                                                            |
| pSynHybPfaPpt9 (pHyb9)                                                            | Derivative of pACYC_SynHyb4 in which the vector backbone was exchanged for the vector backbone of pKG2-PIS via <i>SdaI</i> and <i>PacI</i>                                                                                                                                                                                                                                                                                                                                                                                                                         |
| pACYC_SynHyb7                                                                     | Derivative of pACYC_BB1-6_C3_BB1+2+4+6_mod 5' in which the KR and the DH1 domain of synthetic gene <i>pfa2</i> were replaced by the fusion PCR product consisting of the KR domain of synthetic gene <i>pfa2</i> originating from <i>M. rosea</i> (SBNa008) and the DH1 domain of synthetic gene <i>pfa2</i> originating from <i>A. fasciculatus</i> (SBSr002) via <i>SalI</i> and <i>AcII</i>                                                                                                                                                                     |
| pSynHybPfaPpt15 (pHyb15)                                                          | Derivative of pACYC_SynHyb7 in which the vector backbone was exchanged for the vector backbone of pKG2-PIS via <i>SdaI</i> and <i>PacI</i>                                                                                                                                                                                                                                                                                                                                                                                                                         |
| pACYC_BB1-4_C1_V2                                                                 | Derivative of pACYC_assembly in which building block 1 of the synthetic <i>pfa</i> gene cluster version C1_V2 was inserted via <i>SdaI</i> and <i>ApaLI</i> , in which building block 2 of the synthetic <i>pfa</i> gene cluster version C1_V2 was inserted via <i>ApaLI</i> and <i>AcII</i> , in which building block 3 of the synthetic <i>pfa</i> gene cluster version C1_V2 was inserted via <i>AcII</i> and <i>AvrII</i> , and in which building block 4 of the synthetic <i>pfa</i> gene cluster version C1_V2 was inserted via <i>AvrII</i> and <i>PacI</i> |
| pSynPfaPptAf7 (pAf7)                                                              | Derivative of pACYC_BB1-4_C1_V2 in which the vector backbone was exchanged for the vector backbone of pKG2-PIS via <i>SdaI</i> and <i>PacI</i>                                                                                                                                                                                                                                                                                                                                                                                                                     |
| pACYC_BB1-4_C1_V1_ <i>pfa2</i> - <i>mcherry</i>                                   | Derivative of pACYC_BB1-4_C1_V1 in which the 3' end of synthetic gene <i>pfa2</i> was replaced by the 3' end of synthetic gene <i>pfa2</i> with fused <i>mcherry</i> coding sequence via <i>KfII</i> and <i>AcII</i>                                                                                                                                                                                                                                                                                                                                               |
| pACYC_BB1-4_C1_V2_ <i>pfa2</i> - <i>mcherry</i>                                   | Derivative of pACYC_BB1-4_C1_V2 in which the 3' end of synthetic gene <i>pfa2</i> was replaced by the 3' end of synthetic gene <i>pfa2</i> with fused <i>mcherry</i> coding sequence via <i>KfII</i> and <i>AcII</i>                                                                                                                                                                                                                                                                                                                                               |
| pACYC_BB1-4_C1_V1_ <i>pfa3</i> - <i>mcherry</i>                                   | Derivative of pACYC_BB1-4_C1_V1 in which the 3' end of synthetic gene <i>pfa3</i> was replaced by the 3' end of synthetic gene <i>pfa3</i> with fused <i>mcherry</i> coding sequence via <i>PdiI</i> and <i>AvrII</i>                                                                                                                                                                                                                                                                                                                                              |
| pSynPfaPptAf4- <i>pfa2</i> - <i>mcherry</i> (pAf4- <i>pfa2</i> - <i>mcherry</i> ) | Derivative of pACYC_BB1-4_C1_V1_ <i>pfa2</i> - <i>mcherry</i> in which the vector backbone was exchanged for the vector backbone of pKG2-PIS via <i>SdaI</i> and <i>PacI</i>                                                                                                                                                                                                                                                                                                                                                                                       |
| pSynPfaPptAf7- <i>pfa2</i> - <i>mcherry</i> (pAf7- <i>pfa2</i> - <i>mcherry</i> ) | Derivative of pACYC_BB1-4_C1_V2_ <i>pfa2</i> - <i>mcherry</i> in which the vector backbone was exchanged for the vector backbone of pKG2-PIS via <i>SdaI</i> and <i>PacI</i>                                                                                                                                                                                                                                                                                                                                                                                       |

**Continuation of Supplementary Table 12.**

| <b>Plasmid</b>                                                     | <b>Characteristics</b>                                                                                                                                                                                            |
|--------------------------------------------------------------------|-------------------------------------------------------------------------------------------------------------------------------------------------------------------------------------------------------------------|
| pSynPfaPptAf4- <i>pfa3-mcherry</i><br>(pAf4- <i>pfa3-mcherry</i> ) | Derivative of pACYC_BB1-4_C1_V1- <i>pfa3-mcherry</i> in which the vector backbone was exchanged for the vector backbone of pKG2-PIS via <i>SdaI</i> and <i>PacI</i>                                               |
| pSynPfaPptAf7- <i>pfa3-mcherry</i><br>(pAf7- <i>pfa3-mcherry</i> ) | Derivative of pSynPfaPptAf7 in which the 3' end of synthetic gene <i>pfa3</i> was replaced by the 3' end of synthetic gene <i>pfa3</i> with fused <i>mcherry</i> coding sequence via <i>FseI</i> and <i>AvrII</i> |

**Supplementary Table 13: Expression strains constructed in this study.**

| <b>Strain</b>                                                                                     | <b>Characteristics</b>                                                                                                                                                                                            |
|---------------------------------------------------------------------------------------------------|-------------------------------------------------------------------------------------------------------------------------------------------------------------------------------------------------------------------|
| <i>Y. lipolytica</i> Po1h::SynPfaPptAf2 clones<br>( <i>Y. lipolytica</i> Po1h::Af2 clones)        | <i>Y. lipolytica</i> Po1h with the “yeast cassette” of pSynPfaPptAf2 (liberated with <i>NotI</i> ) randomly integrated in the genome                                                                              |
| <i>Y. lipolytica</i> Po1h::SynPfaPptAf4<br>( <i>Y. lipolytica</i> Po1h::Af4)                      | <i>Y. lipolytica</i> Po1h with the “yeast cassette” of pSynPfaPptAf4 (liberated with <i>SwaI</i> and <i>NotI</i> ) integrated into the preferred integration site ( <i>YALIO_C05907g</i> ) of the genome          |
| <i>Y. lipolytica</i> Po1h::SynPfaPptMr1<br>( <i>Y. lipolytica</i> Po1h::Mr1)                      | <i>Y. lipolytica</i> Po1h with the “yeast cassette” of pSynPfaPptMr1 (liberated with <i>SwaI</i> and <i>NotI</i> ) integrated into the preferred integration site ( <i>YALIO_C05907g</i> ) of the genome          |
| <i>Y. lipolytica</i> Po1h::SynPfaPptMr2<br>( <i>Y. lipolytica</i> Po1h::Mr2)                      | <i>Y. lipolytica</i> Po1h with the “yeast cassette” of pSynPfaPptMr2 (liberated with <i>SwaI</i> and <i>NotI</i> ) integrated into the preferred integration site ( <i>YALIO_C05907g</i> ) of the genome          |
| <i>Y. lipolytica</i> Po1h::SynHybPfaPpt1<br>( <i>Y. lipolytica</i> Po1h::Hyb1)                    | <i>Y. lipolytica</i> Po1h with the “yeast cassette” of pSynHybPfaPpt1 (liberated with <i>SwaI</i> and <i>NotI</i> ) integrated into the preferred integration site ( <i>YALIO_C05907g</i> ) of the genome         |
| <i>Y. lipolytica</i><br>Po1h::SynHybPfaPpt2a<br>( <i>Y. lipolytica</i> Po1h::Hyb2a)               | <i>Y. lipolytica</i> Po1h with the “yeast cassette” of pSynHybPfaPpt2a (liberated with <i>SwaI</i> and <i>NotI</i> ) integrated into the preferred integration site ( <i>YALIO_C05907g</i> ) of the genome        |
| <i>Y. lipolytica</i><br>Po1h::SynHybPfaPpt5a<br>( <i>Y. lipolytica</i> Po1h::Hyb5a)               | <i>Y. lipolytica</i> Po1h with the “yeast cassette” of pSynHybPfaPpt5a (liberated with <i>SwaI</i> and <i>NotI</i> ) integrated into the preferred integration site ( <i>YALIO_C05907g</i> ) of the genome        |
| <i>Y. lipolytica</i> Po1h::SynHybPfaPpt6<br>( <i>Y. lipolytica</i> Po1h::Hyb6)                    | <i>Y. lipolytica</i> Po1h with the “yeast cassette” of pSynHybPfaPpt6 (liberated with <i>SwaI</i> and <i>NotI</i> ) integrated into the preferred integration site ( <i>YALIO_C05907g</i> ) of the genome         |
| <i>Y. lipolytica</i><br>Po1h::SynHybPfaPpt6b<br>( <i>Y. lipolytica</i> Po1h::Hyb6b)               | <i>Y. lipolytica</i> Po1h with the “yeast cassette” of pSynHybPfaPpt6b (liberated with <i>SwaI</i> and <i>NotI</i> ) integrated into the preferred integration site ( <i>YALIO_C05907g</i> ) of the genome        |
| <i>Y. lipolytica</i><br>Po1h::SynHybPfaPpt6b-H2270A<br>( <i>Y. lipolytica</i> Po1h::Hyb6b-H2270A) | <i>Y. lipolytica</i> Po1h with the “yeast cassette” of pSynHybPfaPpt6b-H2270A (liberated with <i>SwaI</i> and <i>NotI</i> ) integrated into the preferred integration site ( <i>YALIO_C05907g</i> ) of the genome |
| <i>Y. lipolytica</i> Po1h::SynHybPfaPpt7<br>( <i>Y. lipolytica</i> Po1h::Hyb7)                    | <i>Y. lipolytica</i> Po1h with the “yeast cassette” of pSynHybPfaPpt7 (liberated with <i>SwaI</i> and <i>NotI</i> ) integrated into the preferred integration site ( <i>YALIO_C05907g</i> ) of the genome         |
| <i>Y. lipolytica</i> Po1h::SynHybPfaPpt8<br>( <i>Y. lipolytica</i> Po1h::Hyb8)                    | <i>Y. lipolytica</i> Po1h with the “yeast cassette” of pSynHybPfaPpt8 (liberated with <i>SwaI</i> and <i>NotI</i> ) integrated into the preferred integration site ( <i>YALIO_C05907g</i> ) of the genome         |
| <i>Y. lipolytica</i> Po1h::SynHybPfaPpt9<br>( <i>Y. lipolytica</i> Po1h::Hyb9)                    | <i>Y. lipolytica</i> Po1h with the “yeast cassette” of pSynHybPfaPpt9 (liberated with <i>SwaI</i> and <i>NotI</i> ) integrated into the preferred integration site ( <i>YALIO_C05907g</i> ) of the genome         |
| <i>Y. lipolytica</i><br>Po1h::SynHybPfaPpt15<br>( <i>Y. lipolytica</i> Po1h::Hyb15)               | <i>Y. lipolytica</i> Po1h with the “yeast cassette” of pSynHybPfaPpt15 (liberated with <i>SwaI</i> and <i>NotI</i> ) integrated into the preferred integration site ( <i>YALIO_C05907g</i> ) of the genome        |
| <i>Y. lipolytica</i> Po1h::SynPfaPptAf7<br>( <i>Y. lipolytica</i> Po1h::Af7)                      | <i>Y. lipolytica</i> Po1h with the “yeast cassette” of pSynPfaPptAf7 (liberated with <i>SwaI</i> and <i>NotI</i> ) integrated into the preferred integration site ( <i>YALIO_C05907g</i> ) of the genome          |

**Continuation of Supplementary Table 13.**

| <b>Strain</b>                                                                                                        | <b>Characteristics</b>                                                                                                                                                                                                         |
|----------------------------------------------------------------------------------------------------------------------|--------------------------------------------------------------------------------------------------------------------------------------------------------------------------------------------------------------------------------|
| <i>Y. lipolytica</i> Po1h::SynPfaPptAf4- <i>pfa2-mcherry</i> ( <i>Y. lipolytica</i> Po1h::Af4- <i>pfa2-mcherry</i> ) | <i>Y. lipolytica</i> Po1h with the “yeast cassette” of pSynPfaPptAf4- <i>pfa2-mcherry</i> (liberated with <i>Swa</i> I and <i>Not</i> I) integrated into the preferred integration site ( <i>YAL10_C05907g</i> ) of the genome |
| <i>Y. lipolytica</i> Po1h::SynPfaPptAf7- <i>pfa2-mcherry</i> ( <i>Y. lipolytica</i> Po1h::Af7- <i>pfa2-mcherry</i> ) | <i>Y. lipolytica</i> Po1h with the “yeast cassette” of pSynPfaPptAf7- <i>pfa2-mcherry</i> (liberated with <i>Swa</i> I and <i>Not</i> I) integrated into the preferred integration site ( <i>YAL10_C05907g</i> ) of the genome |
| <i>Y. lipolytica</i> Po1h::SynPfaPptAf4- <i>pfa3-mcherry</i> ( <i>Y. lipolytica</i> Po1h::Af4- <i>pfa3-mcherry</i> ) | <i>Y. lipolytica</i> Po1h with the “yeast cassette” of pSynPfaPptAf4- <i>pfa3-mcherry</i> (liberated with <i>Swa</i> I and <i>Not</i> I) integrated into the preferred integration site ( <i>YAL10_C05907g</i> ) of the genome |
| <i>Y. lipolytica</i> Po1h::SynPfaPptAf7- <i>pfa3-mcherry</i> ( <i>Y. lipolytica</i> Po1h::Af7- <i>pfa3-mcherry</i> ) | <i>Y. lipolytica</i> Po1h with the “yeast cassette” of pSynPfaPptAf7- <i>pfa3-mcherry</i> (liberated with <i>Swa</i> I and <i>Not</i> I) integrated into the preferred integration site ( <i>YAL10_C05907g</i> ) of the genome |



**Supplementary Table 14: Modified and subsequently normalized codon usage table of a subset of the *Yarrowia lipolytica* CLIB122 CDSs generated for the design of the artificial *pfa* gene cluster C1\_V2.** Codon counts (n) were obtained by omitting the first 20 and last 10 codons of the 1609 selected protein coding sequences, leading to synonymous codon fractions (f) and the formal relative adaptiveness values (w). 20 codons (shaded) bearing the lowest w' according to a reference codon table (Supplementary Table 13) generated from a reference set of predominantly ribosomal genes (Supplementary Table 19) were excluded, corresponding to a relative adaptiveness threshold of 0.04 regarding w'. The synonymous codon fractions were recalculated without the excluded codons (fn) before applying the codon usage table for sequence optimization. Relative adaptiveness values w' from the reference codon table were used for local CAI calculations. Orange and blue marks depict codons that are maximally enriched and depleted, respectively, in the reference set.

| AA      | Cod. | n     | f    | fn   | w     | AA      | Cod.    | n     | f     | fn   | w     |
|---------|------|-------|------|------|-------|---------|---------|-------|-------|------|-------|
| A (Ala) | GCC  | 31617 | 0.55 | 0.61 | 1     | P (Pro) | CCC     | 20128 | 0.63  | 0.67 | 1     |
|         | GCT  | 20624 | 0.36 | 0.39 | 0.652 |         | CCT     | 10125 | 0.32  | 0.33 | 0.503 |
|         | GCA  | 3000  | 0.05 | 0    | 0.095 |         | CCG     | 860   | 0.03  | 0    | 0.043 |
|         | GCG  | 2113  | 0.04 | 0    | 0.067 |         | CCA     | 765   | 0.02  | 0    | 0.038 |
| C (Cys) | TGC  | 3914  | 0.55 | 0.55 | 1     | Q (Gln) | CAG     | 22106 | 0.92  | 1    | 1     |
|         | TGT  | 3192  | 0.45 | 0.45 | 0.816 |         | CAA     | 1819  | 0.08  | 0    | 0.082 |
| D (Asp) | GAC  | 26588 | 0.69 | 0.69 | 1     | R (Arg) | CGA     | 20693 | 0.78  | 0.92 | 1     |
|         | GAT  | 11740 | 0.31 | 0.31 | 0.442 |         | CGG     | 2174  | 0.08  | 0    | 0.105 |
| E (Glu) | GAG  | 36448 | 0.88 | 0.88 | 1     |         | CGT     | 1760  | 0.07  | 0.08 | 0.085 |
|         | GAA  | 4771  | 0.12 | 0.12 | 0.131 |         | AGA     | 1477  | 0.06  | 0    | 0.071 |
| F (Phe) | TTC  | 17809 | 0.7  | 0.7  | 1     |         | CGC     | 336   | 0.01  | 0    | 0.016 |
|         | TTT  | 7814  | 0.3  | 0.3  | 0.439 |         | AGG     | 127   | 0     | 0    | 0.006 |
| G (Gly) | GGC  | 17657 | 0.37 | 0.38 | 1     | S (Ser) | TCC     | 18141 | 0.4   | 0.42 | 1     |
|         | GGT  | 16509 | 0.35 | 0.35 | 0.935 |         | TCT     | 16772 | 0.37  | 0.39 | 0.925 |
|         | GGA  | 12844 | 0.27 | 0.27 | 0.727 |         | TCG     | 5143  | 0.11  | 0.12 | 0.284 |
|         | GGG  | 537   | 0.01 | 0    | 0.03  |         | AGC     | 3088  | 0.07  | 0.07 | 0.17  |
| H (His) | CAC  | 9922  | 0.75 | 0.75 | 1     |         | TCA     | 1432  | 0.03  | 0    | 0.079 |
|         | CAT  | 3342  | 0.25 | 0.25 | 0.337 |         | AGT     | 1127  | 0.02  | 0    | 0.062 |
| I (Ile) | ATC  | 19269 | 0.56 | 0.56 | 1     | T (Thr) | ACC     | 23975 | 0.62  | 0.68 | 1     |
|         | ATT  | 15066 | 0.44 | 0.44 | 0.782 |         | ACT     | 11311 | 0.29  | 0.32 | 0.472 |
|         | ATA  | 139   | 0    | 0    | 0.007 |         | ACA     | 2197  | 0.06  | 0    | 0.092 |
| K (Lys) | AAG  | 38631 | 0.94 | 1    | 1     |         | ACG     | 1376  | 0.04  | 0    | 0.057 |
|         | AAA  | 2296  | 0.06 | 0    | 0.059 | V (Val) | GTC     | 19676 | 0.43  | 0.44 | 1     |
| L (Leu) | CTG  | 22138 | 0.43 | 0.46 | 1     |         | GTG     | 12731 | 0.28  | 0.29 | 0.647 |
|         | CTC  | 17232 | 0.34 | 0.36 | 0.778 |         | GTT     | 12232 | 0.27  | 0.27 | 0.622 |
|         | CTT  | 8705  | 0.17 | 0.18 | 0.393 |         | GTA     | 895   | 0.02  | 0    | 0.045 |
|         | TTG  | 2072  | 0.04 | 0    | 0.094 | W (Trp) | TGG     | 7647  | 1     | 1    | 1     |
|         | CTA  | 1147  | 0.02 | 0    | 0.052 |         | Y (Tyr) | TAC   | 17858 | 0.9  | 0.9   |
|         | TTA  | 104   | 0    | 0    | 0.005 | TAT     |         | 1988  | 0.1   | 0.1  | 0.111 |
| M (Met) | ATG  | 11836 | 1    | 1    | 1     | * (Ter) | TAA     | 1002  | 0.62  | -    | -     |
| N (Asn) | AAC  | 24250 | 0.9  | 0.9  | 1     |         | TAG     | 525   | 0.33  | -    | -     |
|         | AAT  | 2570  | 0.1  | 0.1  | 0.106 |         | TGA     | 82    | 0.05  | -    | -     |

**Supplementary Table 15: Codon usage table of predominantly ribosomal genes from *Yarrowia lipolytica* generated for the design of the artificial *pfa* gene cluster C1\_V2.** Codon counts (n) were obtained by omitting the first 20 and last 10 codons of the 92 selected protein coding sequences (Supplementary Table 17), leading to synonymous codon fractions (f) and the relative adaptiveness values (w). The latter were used for local CAI calculations of the artificial *pfa* gene cluster C1\_V2. Codons with relative adaptiveness values up to 0.04 are shaded. For comparison purposes the gene copy number (GCN) for the matching tRNA is given. Note that base modification is assumed where matching tRNAs are missing (e.g., GCC:IGC and GCU:IGC for Ala). Orange and blue marks depict codons that are maximally enriched and depleted, respectively, compared to the genomic codon usage.

| AA      | Cod. | n    | f    | w     | GCN | AA      | Cod.    | n    | f    | w     | GCN |
|---------|------|------|------|-------|-----|---------|---------|------|------|-------|-----|
| A (Ala) | GCC  | 853  | 0.61 | 1     | 0   | P (Pro) | CCC     | 488  | 0.73 | 1     | 0   |
|         | GCT  | 505  | 0.36 | 0.592 | 30  |         | CCT     | 168  | 0.25 | 0.344 | 21  |
|         | GCA  | 34   | 0.02 | 0.04  | 4   |         | CCG     | 9    | 0.01 | 0.018 | 2   |
|         | GCG  | 14   | 0.01 | 0.016 | 2   |         | CCA     | 7    | 0.01 | 0.014 | 3   |
| C (Cys) | TGC  | 100  | 0.66 | 1     | 8   | Q (Gln) | CAG     | 480  | 0.97 | 1     | 15  |
|         | TGT  | 51   | 0.34 | 0.51  | 0   |         | CAA     | 16   | 0.03 | 0.033 | 3   |
| D (Asp) | GAC  | 551  | 0.7  | 1     | 28  | R (Arg) | CGA     | 1071 | 0.9  | 1     | 25  |
|         | GAT  | 237  | 0.3  | 0.43  | 0   |         | CGT     | 47   | 0.04 | 0.044 | 1   |
| E (Glu) | GAG  | 960  | 0.94 | 1     | 27  |         | AGA     | 31   | 0.03 | 0.029 | 4   |
|         | GAA  | 57   | 0.06 | 0.059 | 6   |         | CGG     | 27   | 0.02 | 0.025 | 0   |
| F (Phe) | TTC  | 449  | 0.81 | 1     | 17  |         | CGC     | 9    | 0.01 | 0.008 | 0   |
|         | TTT  | 106  | 0.19 | 0.236 | 0   | AGG     | 0       | 0    | 0    | 1     |     |
| G (Gly) | GGT  | 589  | 0.51 | 1     | 0   | S (Ser) | TCC     | 450  | 0.49 | 1     | 0   |
|         | GGC  | 385  | 0.33 | 0.654 | 30  |         | TCT     | 367  | 0.4  | 0.816 | 21  |
|         | GGA  | 175  | 0.15 | 0.297 | 11  |         | AGC     | 43   | 0.05 | 0.096 | 6   |
|         | GGG  | 3    | 0    | 0.005 | 0   |         | TCG     | 30   | 0.03 | 0.067 | 4   |
| H (His) | CAC  | 283  | 0.83 | 1     | 12  |         | AGT     | 13   | 0.01 | 0.029 | 0   |
|         | CAT  | 57   | 0.17 | 0.201 | 0   |         | TCA     | 13   | 0.01 | 0.029 | 2   |
| I (Ile) | ATC  | 600  | 0.68 | 1     | 0   | T (Thr) | ACC     | 667  | 0.76 | 1     | 0   |
|         | ATT  | 274  | 0.31 | 0.457 | 26  |         | ACT     | 183  | 0.21 | 0.274 | 22  |
|         | ATA  | 2    | 0    | 0.003 | 1   |         | ACA     | 20   | 0.02 | 0.03  | 3   |
| K (Lys) | AAG  | 1472 | 0.98 | 1     | 34  |         | ACG     | 12   | 0.01 | 0.018 | 2   |
|         | AAA  | 29   | 0.02 | 0.02  | 4   | V (Val) | GTC     | 698  | 0.54 | 1     | 0   |
| L (Leu) | CTC  | 574  | 0.46 | 1     | 0   |         | GTT     | 400  | 0.31 | 0.573 | 24  |
|         | CTG  | 412  | 0.33 | 0.718 | 13  |         | GTG     | 183  | 0.14 | 0.262 | 8   |
|         | CTT  | 244  | 0.2  | 0.425 | 21  |         | GTA     | 8    | 0.01 | 0.011 | 2   |
|         | TTG  | 12   | 0.01 | 0.021 | 3   | W (Trp) | TGG     | 161  | 1    | 1     | 13  |
|         | CTA  | 7    | 0.01 | 0.012 | 2   |         | Y (Tyr) | TAC  | 444  | 0.94  | 1   |
|         | TTA  | 2    | 0    | 0.003 | 1   | TAT     |         | 28   | 0.06 | 0.063 | 0   |
| M (Met) | ATG  | 253  | 1    | 1     | 18  | * (Ter) | TAA     | 79   | 0.86 | -     | -   |
| N (Asn) | AAC  | 588  | 0.95 | 1     | 16  |         | TAG     | 11   | 0.12 | -     | -   |
|         | AAT  | 28   | 0.05 | 0.048 | 0   |         | TGA     | 2    | 0.02 | -     | -   |

**Supplementary Table 16: Codon usage table of predominantly ribosomal genes from *Aetherobacter fasciculatus* (SBSr002) generated for the design of the artificial *pfa* gene cluster C1\_V2.** Codon counts (n) were obtained by omitting the first 20 and last 10 codons of the 57 selected protein coding sequences (Supplementary Table 18), leading to synonymous codon fractions (f) and the relative adaptiveness values (w). The latter were used for local CAI calculations of the native *pfa* gene cluster. For comparison purposes the gene copy number (GCN) for the matching tRNA is given. Note that base modification is assumed where matching tRNAs are missing. Orange and blue marks depict codons that are formally enriched and depleted, respectively, compared to the genomic codon usage.

| AA      | Cod. | n   | f    | w     | GCN | AA      | Cod. | n   | f    | w     | GCN |
|---------|------|-----|------|-------|-----|---------|------|-----|------|-------|-----|
| A (Ala) | GCC  | 551 | 0.49 | 1     | 2   | P (Pro) | CCG  | 249 | 0.5  | 1     | 2   |
|         | GCG  | 434 | 0.39 | 0.788 | 2   |         | CCC  | 227 | 0.45 | 0.912 | 2   |
|         | GCT  | 123 | 0.11 | 0.223 | 0   |         | CCT  | 22  | 0.04 | 0.088 | 0   |
|         | GCA  | 18  | 0.02 | 0.033 | 2   |         | CCA  | 2   | 0    | 0.008 | 1   |
| C (Cys) | TGC  | 60  | 0.95 | 1     | 2   | Q (Gln) | CAG  | 303 | 0.95 | 1     | 2   |
|         | TGT  | 3   | 0.05 | 0.05  | 0   |         | CAA  | 17  | 0.05 | 0.056 | 2   |
| D (Asp) | GAC  | 458 | 0.83 | 1     | 2   | R (Arg) | CGC  | 639 | 0.78 | 1     | 0   |
|         | GAT  | 94  | 0.17 | 0.205 | 0   |         | CGG  | 98  | 0.12 | 0.153 | 2   |
| E (Glu) | GAG  | 625 | 0.85 | 1     | 2   |         | CGT  | 70  | 0.08 | 0.11  | 2   |
|         | GAA  | 112 | 0.15 | 0.179 | 2   |         | CGA  | 9   | 0.01 | 0.014 | 1   |
| F (Phe) | TTC  | 308 | 0.98 | 1     | 1   |         | AGG  | 8   | 0.01 | 0.013 | 1   |
|         | TTT  | 5   | 0.02 | 0.016 | 0   |         | AGA  | 0   | 0    | 0.001 | 2   |
| G (Gly) | GGC  | 722 | 0.74 | 1     | 3   | S (Ser) | TCG  | 222 | 0.44 | 1     | 1   |
|         | GGG  | 123 | 0.13 | 0.17  | 2   |         | AGC  | 177 | 0.35 | 0.797 | 1   |
|         | GGT  | 103 | 0.11 | 0.143 | 0   |         | TCC  | 96  | 0.19 | 0.432 | 1   |
|         | GGA  | 24  | 0.02 | 0.033 | 2   |         | TCT  | 6   | 0.01 | 0.027 | 0   |
| H (His) | CAC  | 211 | 0.93 | 1     | 2   |         | AGT  | 4   | 0.01 | 0.018 | 0   |
|         | CAT  | 15  | 0.07 | 0.071 | 0   |         | TCA  | 1   | 0    | 0.005 | 1   |
| I (Ile) | ATC  | 536 | 0.97 | 1     | 2   | T (Thr) | ACG  | 292 | 0.5  | 1     | 2   |
|         | ATT  | 15  | 0.03 | 0.028 | 0   |         | ACC  | 285 | 0.48 | 0.976 | 2   |
|         | ATA  | 0   | 0    | 0.001 | 1   |         | ACT  | 9   | 0.02 | 0.031 | 0   |
| K (Lys) | AAG  | 761 | 0.96 | 1     | 2   |         | ACA  | 3   | 0.01 | 0.01  | 1   |
|         | AAA  | 34  | 0.04 | 0.045 | 2   | V (Val) | GTC  | 596 | 0.63 | 1     | 2   |
| L (Leu) | CTC  | 597 | 0.73 | 1     | 2   |         | GTG  | 308 | 0.32 | 0.517 | 2   |
|         | CTG  | 186 | 0.23 | 0.312 | 1   |         | GTT  | 41  | 0.04 | 0.069 | 0   |
|         | CTT  | 24  | 0.03 | 0.04  | 0   |         | GTA  | 3   | 0    | 0.005 | 1   |
|         | TTG  | 13  | 0.02 | 0.022 | 2   | W (Trp) | TGG  | 65  | 1    | 1     | 2   |
|         | CTA  | 1   | 0    | 0.002 | 2   | Y (Tyr) | TAC  | 192 | 0.95 | 1     | 2   |
|         | TTA  | 0   | 0    | 0.001 | 1   |         | TAT  | 10  | 0.05 | 0.052 | 0   |
| M (Met) | ATG  | 201 | 1    | 1     | 2   | * (Ter) | TGA  | 26  | 0.46 | -     | -   |
| N (Asn) | AAC  | 246 | 0.97 | 1     | 2   |         | TAG  | 23  | 0.4  | -     | -   |
|         | AAT  | 7   | 0.03 | 0.028 | 0   |         | TAA  | 8   | 0.14 | -     | -   |

**Supplementary Table 17: Formal codon bias of the reference gene subsets used for adaptation of the local CAI of genes *pfa1*, *pfa2*, *pfa3*, and *ppt* from the artificial *pfa* biosynthetic gene cluster C1\_V2.** DF denotes degrees of freedom (sum of the individual sizes of the synonymous codon groups, in each case subtracted by 1).  $N_{\text{codons}}$  are the codon counts of the ribosomal reference subsets and the automatically clustered larger subsets, respectively. G is the raw value from the G-statistic and  $\Delta H$  is 50 % of the G-value (the log likelihood ratio), normalized by the observed codon count ( $N_{\text{codons}}$ ) in the gene subsets<sup>33</sup>.  $\Delta H$  values of the reference sets which were used for the optimization of the local CAI of cluster C1\_V2 are underlined. A minimum length of 200 bp and offsets of 60 bp at the 5' ends as well as 30 bp at the 3' ends were applied to the evaluated coding sequences, respectively.

| Gene set                                         | DF | $N_{\text{codons}}$ | G         | p-value | $\Delta H^*)$ |
|--------------------------------------------------|----|---------------------|-----------|---------|---------------|
| <i>Aetherobacter fasciculatus</i> (SBSr002) Ribo | 41 | 10298               | 739.92    | < .001  | <u>0.036</u>  |
| <i>Aetherobacter fasciculatus</i> (SBSr002) Auto | 41 | 1309210             | 58247.04  | <.001   | 0.022         |
| <i>Yarrowia lipolytica</i> CLIB122 Ribo          | 41 | 15565               | 6368.89   | < .001  | <u>0.205</u>  |
| <i>Yarrowia lipolytica</i> CLIB122 Auto          | 41 | 616372              | 103085.57 | < .001  | 0.084         |

**Supplementary Table 18: Reference set of predominantly ribosomal genes coding for hypothetically highly expressed proteins from *Aetherobacter fasciculatus* (SBSr002) (MSr9330).** The initial collection of 64 sequences was reduced to 57 due to the applied length threshold of 200bp.

| No. | Product                      | Locus_tag     | No. | Product                   | Locus_tag     |
|-----|------------------------------|---------------|-----|---------------------------|---------------|
| 1   | 30S ribosomal protein S1     | MSr9330_18190 | 30  | 50S ribosomal protein L9  | MSr9330_17660 |
| 2   | 30S ribosomal protein S1     | MSr9330_50480 | 31  | 50S ribosomal protein L10 | MSr9330_46440 |
| 3   | 30S ribosomal protein S2     | MSr9330_72100 | 32  | 50S ribosomal protein L11 | MSr9330_46420 |
| 4   | 30S ribosomal protein S3     | MSr9330_25510 | 33  | 50S ribosomal protein L13 | MSr9330_22270 |
| 5   | 30S ribosomal protein S4     | MSr9330_25710 | 34  | 50S ribosomal protein L14 | MSr9330_25550 |
| 6   | 30S ribosomal protein S4     | MSr9330_46070 | 35  | 50S ribosomal protein L15 | MSr9330_25640 |
| 7   | 30S ribosomal protein S5     | MSr9330_25620 | 36  | 50S ribosomal protein L16 | MSr9330_25520 |
| 8   | 30S ribosomal protein S6     | MSr9330_17680 | 37  | 50S ribosomal protein L17 | MSr9330_25730 |
| 9   | 30S ribosomal protein S7     | MSr9330_14540 | 38  | 50S ribosomal protein L18 | MSr9330_25610 |
| 10  | 30S ribosomal protein S8     | MSr9330_25590 | 39  | 50S ribosomal protein L19 | MSr9330_88640 |
| 11  | 30S ribosomal protein S9     | MSr9330_22260 | 40  | 50S ribosomal protein L20 | MSr9330_39100 |
| 12  | 30S ribosomal protein S10    | MSr9330_14510 | 41  | 50S ribosomal protein L21 | MSr9330_22640 |
| 13  | 30S ribosomal protein S11    | MSr9330_25700 | 42  | 50S ribosomal protein L22 | MSr9330_25500 |
| 14  | 30S ribosomal protein S12    | MSr9330_14550 | 43  | 50S ribosomal protein L23 | MSr9330_14490 |
| 15  | 30S ribosomal protein S13    | MSr9330_25690 | 44  | 50S ribosomal protein L24 | MSr9330_25560 |
| 16  | 30S ribosomal protein S15    | MSr9330_65250 | 45  | 50S ribosomal protein L25 | MSr9330_17700 |
| 17  | 30S ribosomal protein S16    | MSr9330_67560 | 46  | 50S ribosomal protein L27 | MSr9330_22650 |
| 18  | 30S ribosomal protein S17    | MSr9330_25540 | 47  | 50S ribosomal protein L28 | MSr9330_67670 |
| 19  | 30S ribosomal protein S18    | MSr9330_17670 | 48  | 50S ribosomal protein L29 | MSr9330_25530 |
| 20  | 30S ribosomal protein S19    | MSr9330_14470 | 49  | 50S ribosomal protein L30 | MSr9330_25630 |
| 21  | 30S ribosomal protein S20    | MSr9330_25150 | 50  | 50S ribosomal protein L31 | MSr9330_27610 |
| 22  | 30S ribosomal protein S21    | MSr9330_54870 | 51  | elongation factor G       | MSr9330_14530 |
| 23  | 50S ribosomal protein L1     | MSr9330_46430 | 52  | elongation factor G       | MSr9330_42950 |
| 24  | 50S ribosomal protein L2     | MSr9330_14480 | 53  | elongation factor G       | MSr9330_52660 |
| 25  | 50S ribosomal protein L3     | MSr9330_48250 | 54  | elongation factor G       | MSr9330_89640 |
| 26  | 50S ribosomal protein L4     | MSr9330_14500 | 55  | elongation factor Ts      | MSr9330_72110 |
| 27  | 50S ribosomal protein L5     | MSr9330_25570 | 56  | elongation factor Tu      | MSr9330_14520 |
| 28  | 50S ribosomal protein L6     | MSr9330_25600 | 57  | elongation factor Tu      | MSr9330_46370 |
| 29  | 50S ribosomal protein L7/L12 | MSr9330_46450 |     |                           |               |

**Supplementary Table 19: Reference set of predominantly ribosomal genes coding for hypothetically highly expressed proteins from *Yarrowia lipolytica* CLIB122.** The initial collection of 97 sequences was reduced to 92 due to the applied length threshold of 200 bp.

| No. | Product                           | Locus_tag    | No. | Product                                                              | Locus_tag    |
|-----|-----------------------------------|--------------|-----|----------------------------------------------------------------------|--------------|
| 1   | 40S ribosomal protein S0          | YALIOA18205g | 47  | 60S ribosomal protein L13                                            | YALIOB12826g |
| 2   | 40S ribosomal protein S1          | YALIOF05676g | 48  | 60S ribosomal protein L14                                            | YALIOE00550g |
| 3   | 40S ribosomal protein S2          | YALIOE14465g | 49  | 60S ribosomal protein L15                                            | YALIOD24387g |
| 4   | 40S ribosomal protein S3          | YALIOE23694g | 50  | 60S ribosomal protein L16                                            | YALIOC09218g |
| 5   | 40S ribosomal protein S4          | YALIOD12903g | 51  | 60S ribosomal protein L17                                            | YALIOC15895g |
| 6   | 40S ribosomal protein S5          | YALIOF08569g | 52  | 60S ribosomal protein L18                                            | YALIOB08866g |
| 7   | 40S ribosomal protein S6          | YALIOF18766g | 53  | 60S ribosomal protein L19                                            | YALIOE25025g |
| 8   | 40S ribosomal protein S7          | YALIOA10725g | 54  | 60S ribosomal protein L20                                            | YALIOF24123g |
| 9   | 40S ribosomal protein S8          | YALIOF24959g | 55  | 60S ribosomal protein L21                                            | YALIOF05522g |
| 10  | 40S ribosomal protein S9          | YALIOF05544g | 56  | 60S ribosomal protein L22                                            | YALIOE32208g |
| 11  | 40S ribosomal protein S11         | YALIOF20482g | 57  | 60S ribosomal protein L23                                            | YALIOD10263g |
| 12  | 40S ribosomal protein S12         | YALIOF06160g | 58  | 60S ribosomal protein L24                                            | YALIOE23584g |
| 13  | 40S ribosomal protein S13         | YALIOF11055g | 59  | 60S ribosomal protein L25                                            | YALIOF25531g |
| 14  | 40S ribosomal protein S14         | YALIOD05753g | 60  | 60S ribosomal protein L26                                            | YALIOE21241g |
| 15  | 40S ribosomal protein S15         | YALIOF05803g | 61  | 60S ribosomal protein L27                                            | YALIOB05896g |
| 16  | 40S ribosomal protein S16         | YALIOB12848g | 62  | 60S ribosomal protein L28                                            | YALIOB21076g |
| 17  | 40S ribosomal protein S17         | YALIOF14465g | 63  | 60S ribosomal protein L30                                            | YALIOE23562g |
| 18  | 40S ribosomal protein S18         | YALIOD20614g | 64  | 60S ribosomal protein L31                                            | YALIOE24475g |
| 19  | 40S ribosomal protein S19         | YALIOB20504g | 65  | 60S ribosomal protein L32                                            | YALIOE30811g |
| 20  | 40S ribosomal protein S20         | YALIOE20581g | 66  | 60S ribosomal protein L33                                            | YALIOE31955g |
| 21  | 40S ribosomal protein S21         | YALIOD13794g | 67  | 60S ribosomal protein L33                                            | YALIOF31405g |
| 22  | 40S ribosomal protein S22         | YALIOD05731g | 68  | 60S ribosomal protein L34                                            | YALIOC05082g |
| 23  | 40S ribosomal protein S22         | YALIOF25399g | 69  | 60S ribosomal protein L35                                            | YALIOA09922g |
| 24  | 40S ribosomal protein S23         | YALIOA20746g | 70  | 60S ribosomal protein L36                                            | YALIOE30602g |
| 25  | 40S ribosomal protein S24         | YALIOD13728g | 71  | 60S ribosomal protein L37                                            | YALIOE01452g |
| 26  | 40S ribosomal protein S25         | YALIOC03872g | 72  | 60S ribosomal protein L42                                            | YALIOB04224g |
| 27  | 40S ribosomal protein S26         | YALIOE19701g | 73  | 60S ribosomal protein L43                                            | YALIOE34573g |
| 28  | 40S ribosomal protein S27         | YALIOE34826g | 74  | 66S preribosome component MAK16                                      | YALIOC08052g |
| 29  | 40S ribosomal protein S28         | YALIOC05148g | 75  | 90S preribosome/SSU processome component KRR1                        | YALIOF30393g |
| 30  | 60S acidic ribosomal protein P0   | YALIOB14146g | 76  | acetate--CoA ligase                                                  | YALIOF05962g |
| 31  | 60S acidic ribosomal protein P1   | YALIOB12804g | 77  | ADP/ATP carrier protein                                              | YALIOA10659g |
| 32  | 60S acidic ribosomal protein P1   | YALIOB21252g | 78  | ADP/ATP carrier protein                                              | YALIOD08228g |
| 33  | 60S acidic ribosomal protein P2   | YALIOF05808g | 79  | ADP/ATP carrier protein                                              | YALIOF19712g |
| 34  | 60S ribosomal export protein NMD3 | YALIOF08151g | 80  | AGC family protein serine/threonine kinase domain-containing protein | YALIOC15444g |
| 35  | 60S ribosomal protein L1          | YALIOE31911g | 81  | CBS/PBI domain-containing protein                                    | YALIOD18106g |
| 36  | 60S ribosomal protein L2          | YALIOF24739g | 82  | elongation factor 1 gamma domain-containing protein                  | YALIOB12562g |
| 37  | 60S ribosomal protein L3          | YALIOC21560g | 83  | elongation factor 1 gamma domain-containing protein                  | YALIOC24420g |
| 38  | 60S ribosomal protein L4          | YALIOC06820g | 84  | mRNA turnover protein MRT4                                           | YALIOF31317g |
| 39  | 60S ribosomal protein L5          | YALIOE22352g | 85  | ribosome biogenesis protein BRX1                                     | YALIOB11880g |
| 40  | 60S ribosomal protein L6          | YALIOE27830g | 86  | ribosome biogenesis protein NIP7                                     | YALIOE34287g |
| 41  | 60S ribosomal protein L7          | YALIOE13618g | 87  | ribosome biogenesis protein NSA2                                     | YALIOE10461g |
| 42  | 60S ribosomal protein L8          | YALIOF24695g | 88  | ribosome biogenesis protein RLP24                                    | YALIOB09779g |
| 43  | 60S ribosomal protein L9          | YALIOE29073g | 89  | rRNA methyltransferase NOP1                                          | YALIOC15873g |
| 44  | 60S ribosomal protein L10         | YALIOD13104g | 90  | small nucleolar ribonucleoprotein SNU13                              | YALIOF24497g |
| 45  | 60S ribosomal protein L11         | YALIOB15103g | 91  | ubiquitin-40S ribosomal protein S31 fusion protein                   | YALIOF09790g |
| 46  | 60S ribosomal protein L12         | YALIOD13882g | 92  | ubiquitin-60S ribosomal protein L40 fusion protein                   | YALIOF08745g |

## Supplementary References

1. Chaney, J. L., Steele, A., Carmichael, R., Rodriguez, A., Specht, A. T., Ngo, K., Li, J., Emrich, S. & Clark, P. L. Widespread position-specific conservation of synonymous rare codons within coding sequences. *PLoS Comput. Biol.* **13**, e1005531 (2017).
2. Qian, W., Yang, J. R., Pearson, N. M., Maclean, C. & Zhang, J. Balanced codon usage optimizes eukaryotic translational efficiency. *PLoS Genet.* **8**, e1002603 (2012).
3. Ikemura, T. Codon usage and tRNA content in unicellular and multicellular organisms. *Mol. Biol. Evol.* **2**, 13-34 (1985).
4. Sharp, P. M. & Li, W. H. The codon Adaptation Index--a measure of directional synonymous codon usage bias and its potential applications. *Nucleic acids Res.* **15**, 1281–1295 (1987).
5. Chu, D. et al. Translation elongation can control translation initiation on eukaryotic mRNAs. *EMBO J.* **33**, 21–34 (2014).
6. Pedersen, M. et al. The functional half-life of an mRNA depends on the ribosome spacing in an early coding region. *J. Mol. Biol.* **407**, 35–44 (2011).
7. Shirokikh, N. E. & Preiss, T. Translation initiation by cap-dependent ribosome recruitment: Recent insights and open questions. *Wiley Interdiscip. Rev. RNA* **9**, e1473 (2018).
8. Dvir, S. et al. Deciphering the rules by which 5'-UTR sequences affect protein expression in yeast. *Proc. Natl. Acad. Sci. USA* **110**, E2792–E2801 (2013).
9. Shah, P., Ding, Y., Niemczyk, M., Kudla, G. & Plotkin, J. B. Rate-limiting steps in yeast protein translation. *Cell* **153**, 1589–1601 (2013).
10. Lorenz, R. et al. ViennaRNA Package 2.0. *Algorithms Mol. Biol.* **6**, 26 (2011).
11. Komar, A. A. A pause for thought along the co-translational folding pathway. *Trends Biochem. Sci.* **34**, 16–24 (2009).
12. O'Brien, E. P., Vendruscolo, M. & Dobson, C. M. Kinetic modelling indicates that fast-translating codons can coordinate cotranslational protein folding by avoiding misfolded intermediates. *Nat. Commun.* **5**, 2988 (2014).
13. Angov, E., Hillier, C. J., Kincaid, R. L. & Lyon, J. A. Heterologous protein expression is enhanced by harmonizing the codon usage frequencies of the target gene with those of the expression host. *PloS One* **3**, e2189 (2008).
14. Buhr, F. et al. Synonymous Codons Direct Cotranslational Folding toward Different Protein Conformations. *Mol. Cell* **61**, 341–351 (2016).
15. Zhang, G., Hubalewska, M. & Ignatova, Z. Transient ribosomal attenuation coordinates protein synthesis and co-translational folding. *Nat. Struct. Mol. Biol.* **16**, 274 (2009).
16. Sander, I. M., Chaney, J. L. & Clark, P. L. Expanding Anfinsen's principle: contributions of synonymous codon selection to rational protein design. *J. Am. Chem. Soc.* **136**, 858–861 (2014).
17. Navon, S. & Pilpel, Y. The role of codon selection in regulation of translation efficiency deduced from synthetic libraries. *Genome Biol.* **12**, R12 (2011).
18. Pershing, N. L. et al. Rare codons capacitate Kras-driven de novo tumorigenesis. *J. Clin. Invest.* **125**, 222–233 (2015).

19. Spencer, P. S., Siller, E., Anderson, J. F. & Barral, J. M. Silent substitutions predictably alter translation elongation rates and protein folding efficiencies. *J. Mol. Biol.* **422**, 328–335 (2012).
20. Brockmann, R., Beyer, A., Heinisch, J. J. & Wilhelm, T. Posttranscriptional expression regulation: what determines translation rates? *PLoS Comput. Biol.* **3**, e57 (2007).
21. Weinberg, D. E. et al. Improved Ribosome-Footprint and mRNA Measurements Provide Insights into Dynamics and Regulation of Yeast Translation. *Cell Rep.* **14**, 1787–1799 (2016).
22. Gardin, J. et al. Measurement of average decoding rates of the 61 sense codons in vivo. *Elife* **3**, e03735 (2014).
23. Villada, J. C., Brustolini, O. J. B. & Batista da Silveira, W. Integrated analysis of individual codon contribution to protein biosynthesis reveals a new approach to improving the basis of rational gene design. *DNA Res.* **24**, 419–434 (2017).
24. Ran, W. & Higgs, P. G. Contributions of speed and accuracy to translational selection in bacteria. *PloS One* **7**, e51652 (2012).
25. Burke, E. K. & Bykov, Y. The late acceptance Hill-Climbing heuristic. *European Journal of Operational Research* **258**, 70–78 (2017).
26. Wen, J. D. et al. Following translation by single ribosomes one codon at a time. *Nature* **452**, 598 (2008).
27. Neuveglise-Degouy, C., Marck, C. & Gaillardin, C. The intronome of budding yeasts. *C. R. Biol.* **334**, 662–670 (2011).
28. Seligmann, H. & Pollock, D. D. The ambush hypothesis: hidden stop codons prevent off-frame gene reading. *DNA Cell Biol.* **23**, 701–705 (2004).
29. Noé, L. & Kucherov, G. YASS: enhancing the sensitivity of DNA similarity search. *Nucleic acids Res.* **33**, W540–W543 (2005).
30. Anikin, M., Molodtsov, V., Temiakov, D. & McAllister, W. T. *Transcript Slippage and Recoding. In Recoding: Expansion of Decoding Rules Enriches Gene Expression* (Springer, New York, 2010).
31. Reis, M. D., Savva, R. & Wernisch, L. Solving the riddle of codon usage preferences: a test for translational selection. *Nucleic acids Res.* **32**, 5036–5044 (2004).
32. Tuller, T. et al. An evolutionarily conserved mechanism for controlling the efficiency of protein translation. *Cell* **141**, 344–354 (2010).
33. Waldman, Y. Y., Tuller, T., Shlomi, T., Sharan, R. & Ruppin, E. Translation efficiency in humans: tissue specificity, global optimization and differences between developmental stages. *Nucleic acids Res.* **38**, 2964–2974 (2010).
34. Grosjean, H., de Crécy-Lagard, V. & Marck, C. Deciphering synonymous codons in the three domains of life: co-evolution with specific tRNA modification enzymes. *FEBS Lett.* **584**, 252–264 (2010).
35. Percudani, R., Pavesi, A. & Ottonello, S. Transfer RNA gene redundancy and translational selection in *Saccharomyces cerevisiae*. *J. Mol. Biol.* **268**, 322–330 (1997).
36. Novoa, E. M., Pavon-Eternod, M., Pan, T. & de Pouplana, L. R. A role for tRNA modifications in genome structure and codon usage. *Cell* **149**, 202–213 (2012).
37. Diwan, G. D. & Agashe, D. Wobbling Forth and Drifting Back: The Evolutionary History and Impact of Bacterial tRNA Modifications. *Mol. Biol. Evol.* **35**, 2046–2059 (2018).

38. Chan, P. P. & Lowe, T. M. GtRNAdb 2.0: an expanded database of transfer RNA genes identified in complete and draft genomes. *Nucleic acids Res.* **44**, D184–D189 (2015).
39. Lowe, T. M. & Chan, P. P. tRNAscan-SE On-line: integrating search and context for analysis of transfer RNA genes. *Nucleic acids Res.* **44**, W54–W57 (2016).
40. Weenink, T., McKiernan, R. M. & Ellis, T. Rational Design of RNA Structures that Predictably Tune Eukaryotic Gene Expression. *BioRxiv* 137877 (2017).
41. Davidow, L. S. et al. The *Yarrowia lipolytica* *LEU2* gene. *Curr. Genet.* **11**, 377–383 (1987).
42. Nicaud, J.M. et al. Protein expression and secretion in the yeast *Yarrowia lipolytica*. *FEMS Yeast Res.* **2**, 371–379 (2002).
